# Supplementary material for: Traceless enzymatic protein synthesis without ligation sites constraint
Source: Research Square preprint supplement (doi:10.21203/rs.3.rs-143176/v1), 2021-02-04
Supplement: Supplementary file 1 [file 4a58e656659ff44c32f13246.docx]

Supplementary HPLC traces and MS figures for

**Traceless enzymatic protein synthesis**

**without ligation sites constraint**

Ruifeng Li1,2#, Marcel Schmidt3#, Tong Zhu1,2#, Xinyu Yang1,2, Jing Feng1,2, Yu’e Tian1, Yinglu Cui1, Timo Nuijens3*, Bian Wu1*

1 CAS Key Laboratory of Microbial Physiological and Metabolic Engineering, State Key Laboratory of Microbial Resources, Institute of Microbiology, Chinese Academy of Sciences, China

2  University of Chinese Academy of Sciences, China

3 Fresenius Kabi iPSUM, I&D Center EnzyPep B.V., the Netherlands

# Equal contribution.

* Email: [timo.nuijens@fresenius-kabi.com](mailto:timo.nuijens@fresenius-kabi.com) or [wub@im.ac.cn](mailto:wub@im.ac.cn)

Table of contents

[1 Alcohol screening for enzymatic ligation 1](#_Toc58246452)

[2 Substrate screening of Omniligase-1 4](#_Toc58246453)

[2.1 screening of Omniligase-1 P4 substrates 4](#_Toc58246454)

[2.2 screening of Omniligase-1 P3 substrates 9](#_Toc58246455)

[2.3 screening of Omniligase-1 P2 substrates 14](#_Toc58246456)

[2.4 screening of Omniligase-1 P1 substrates 19](#_Toc58246457)

[2.5 screening of Omniligase-1 P1’ substrates 24](#_Toc58246458)

[2.6 screening of Omniligase-1 P2’ substrates 29](#_Toc58246459)

[3 Substrate screening of PAM12B 34](#_Toc58246460)

[3.1 screening of PAM12B P2 substrates 34](#_Toc58246461)

[3.2 screening of PAM12B P1 substrates 36](#_Toc58246462)

[4 Screening of PHM, PAL & PAM12B P1 substrates 38](#_Toc58246463)

# 1 Alcohol screening for enzymatic ligation

1. **aliphatic alcohols, 2-hydroxyacetamide analogues, fluoroalcohols**


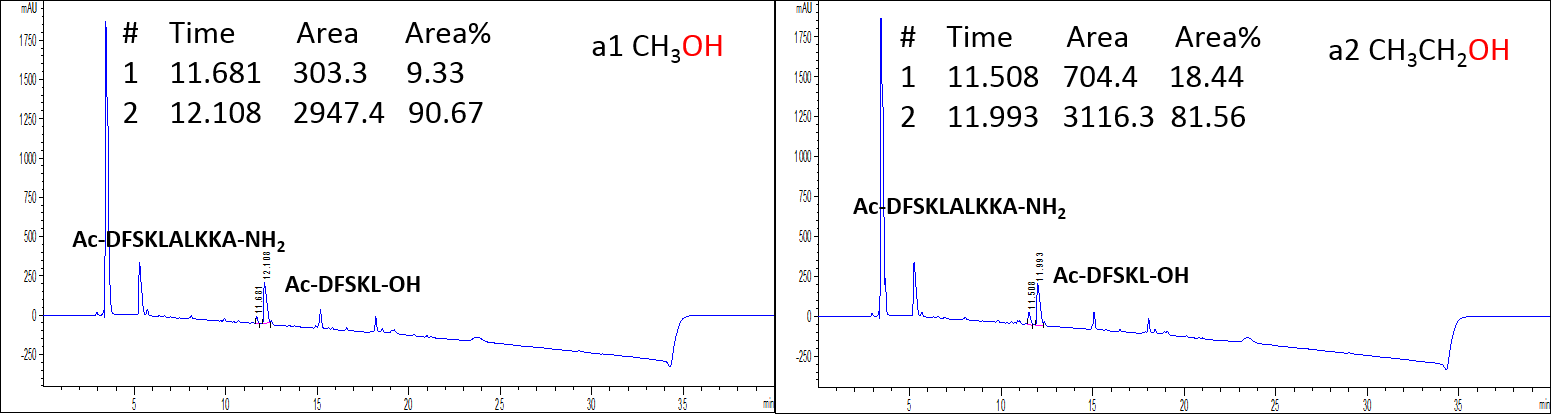

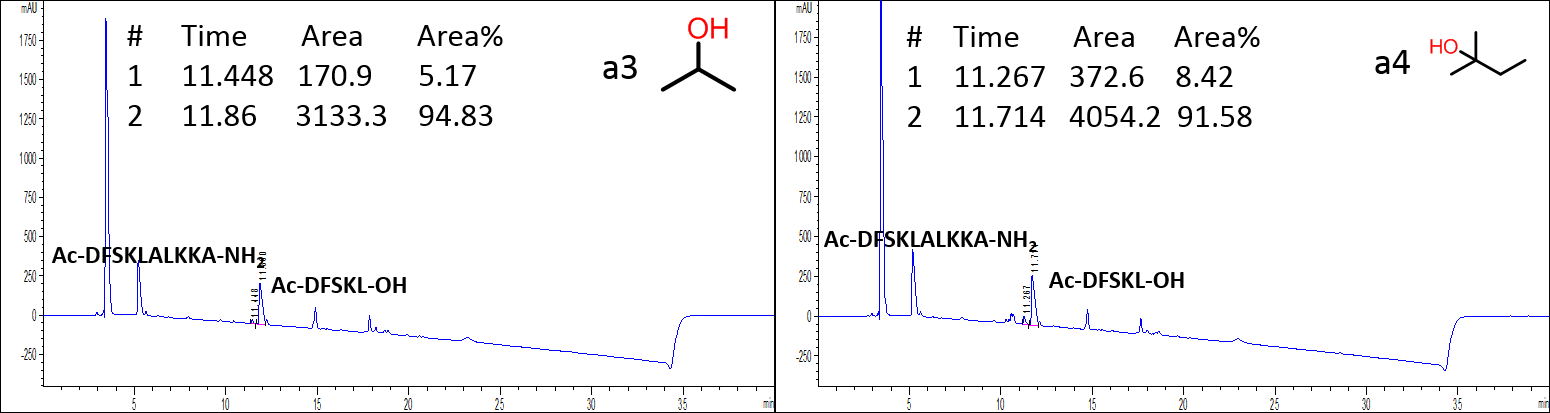

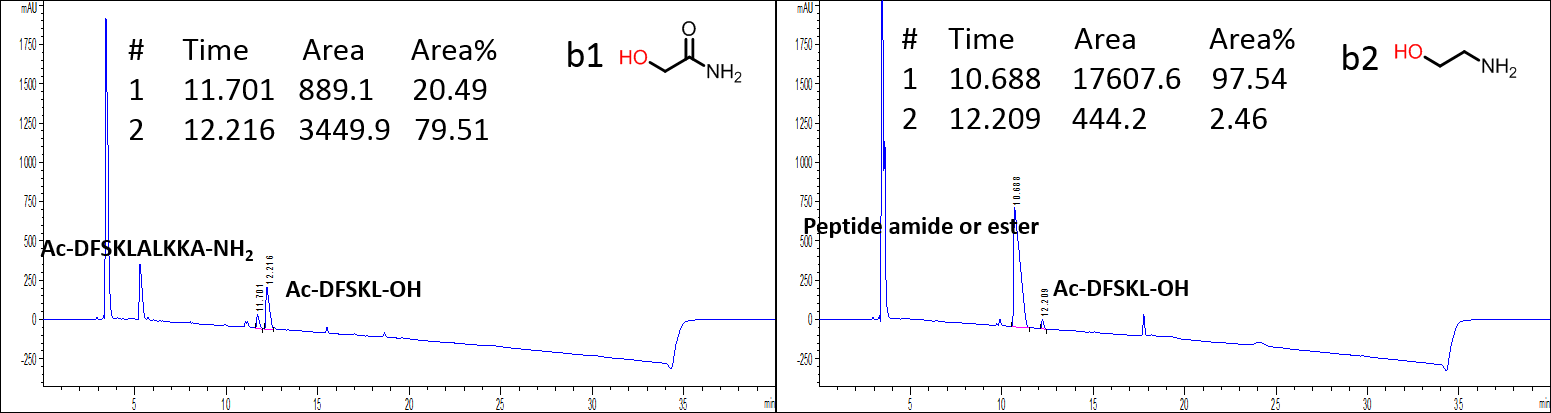

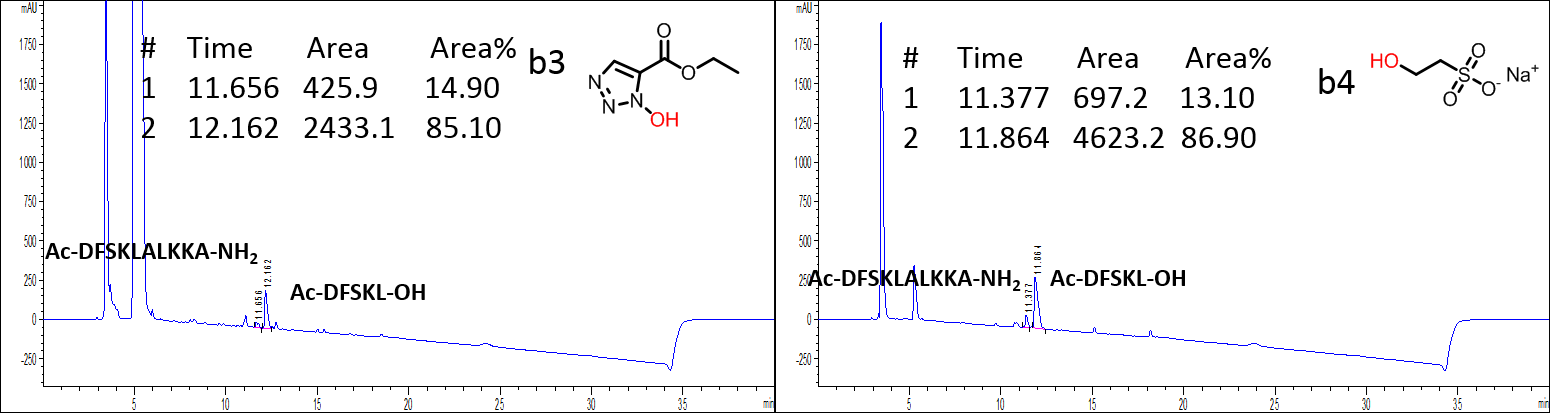

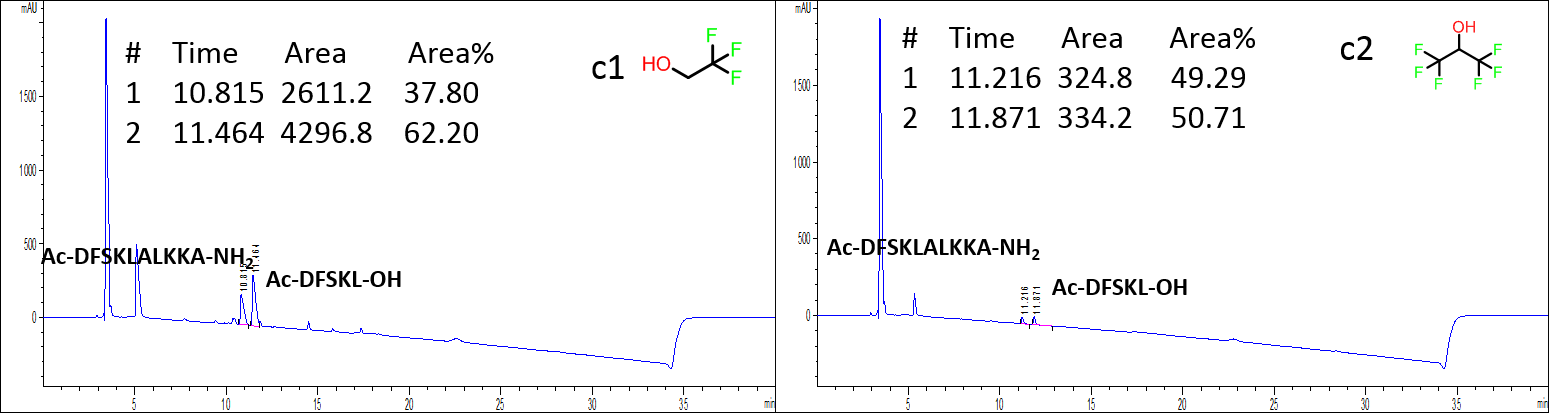


1. **aromatic alcohols**


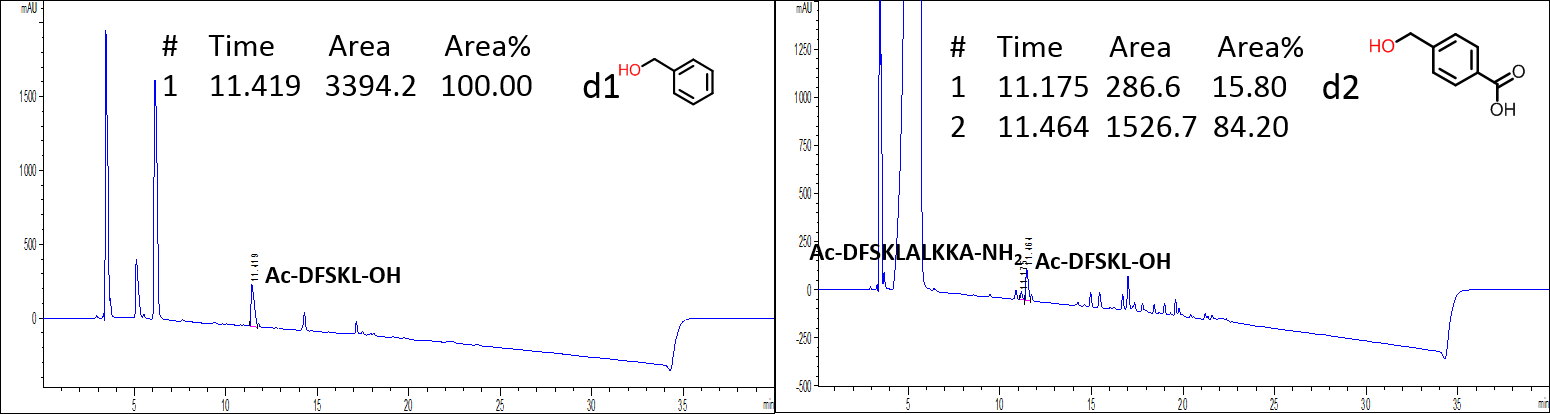

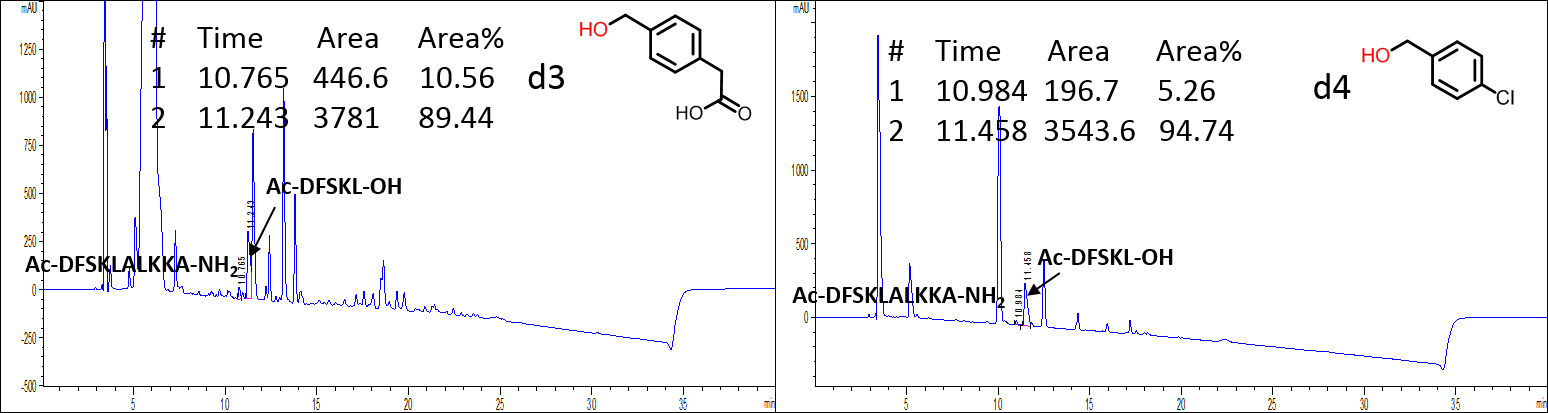

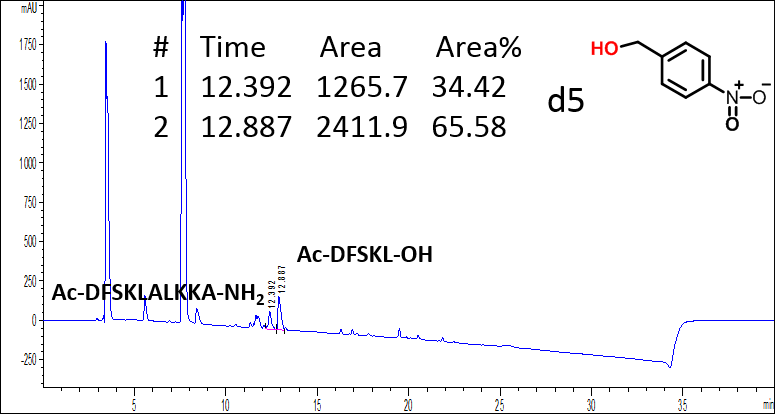


1. **phenol derivatives**


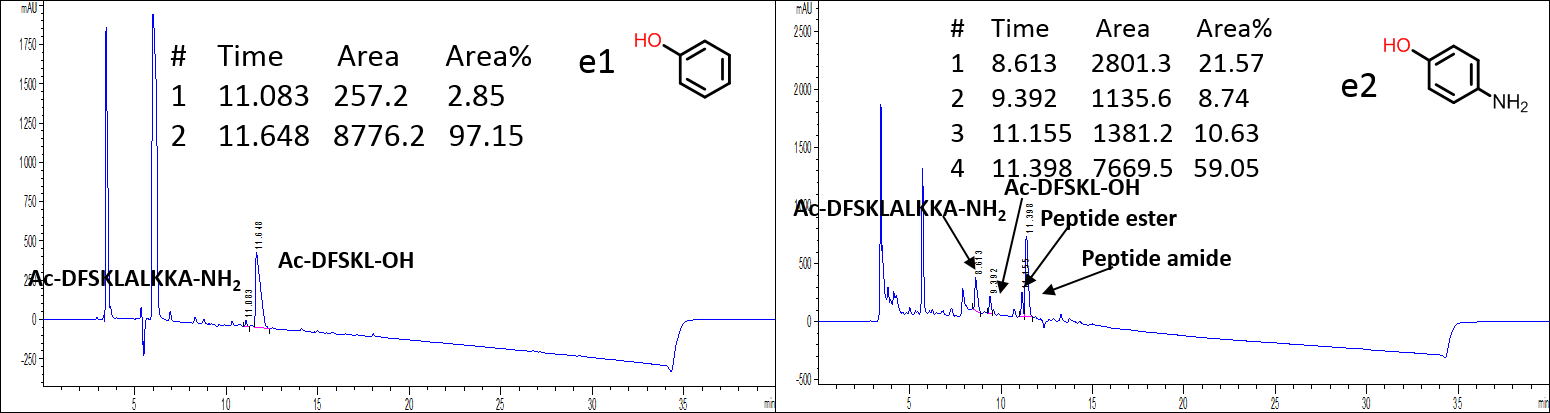

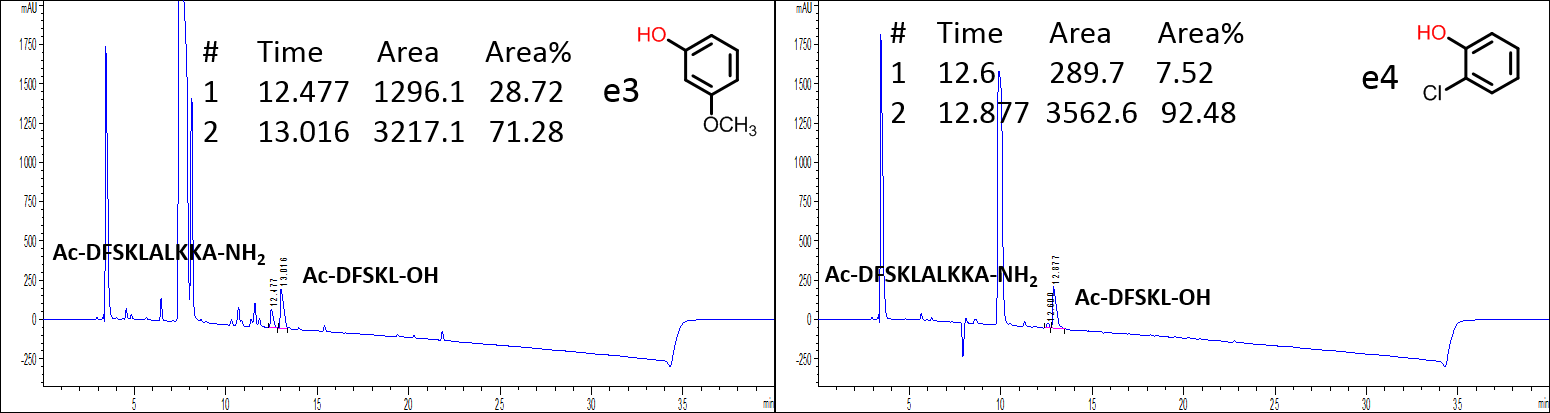

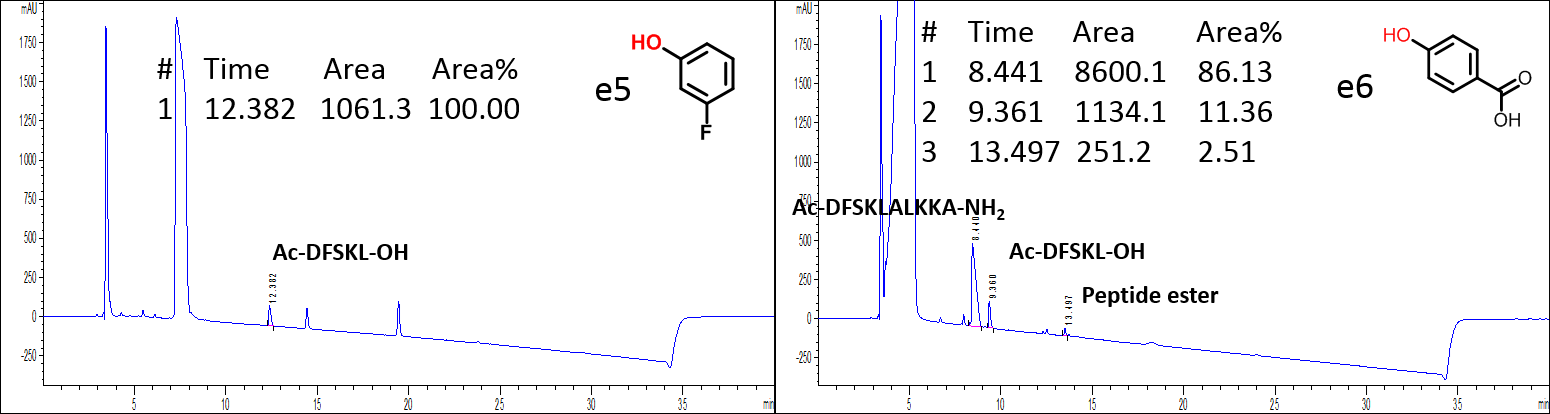

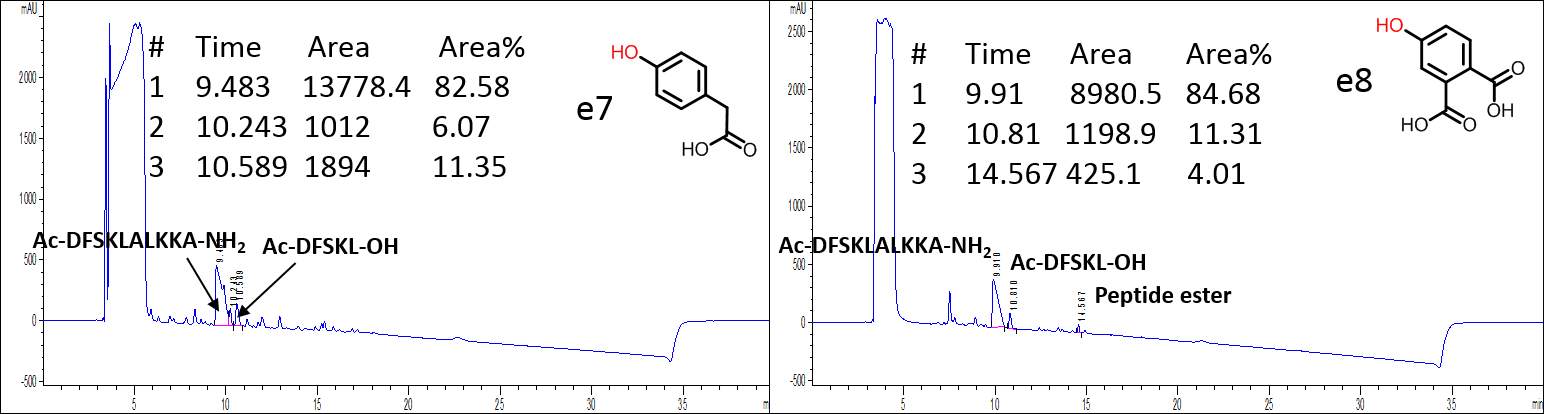

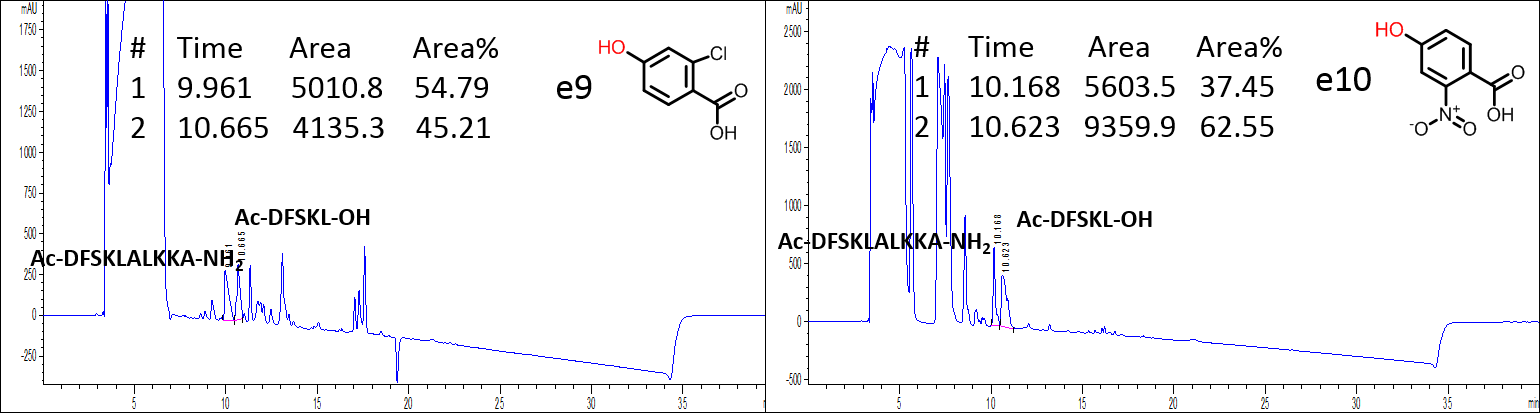


# 2 Substrate screening of Omniligase-1

## 2.1 screening of Omniligase-1 P4 substrates

1. **P4 = V, I, M, L**


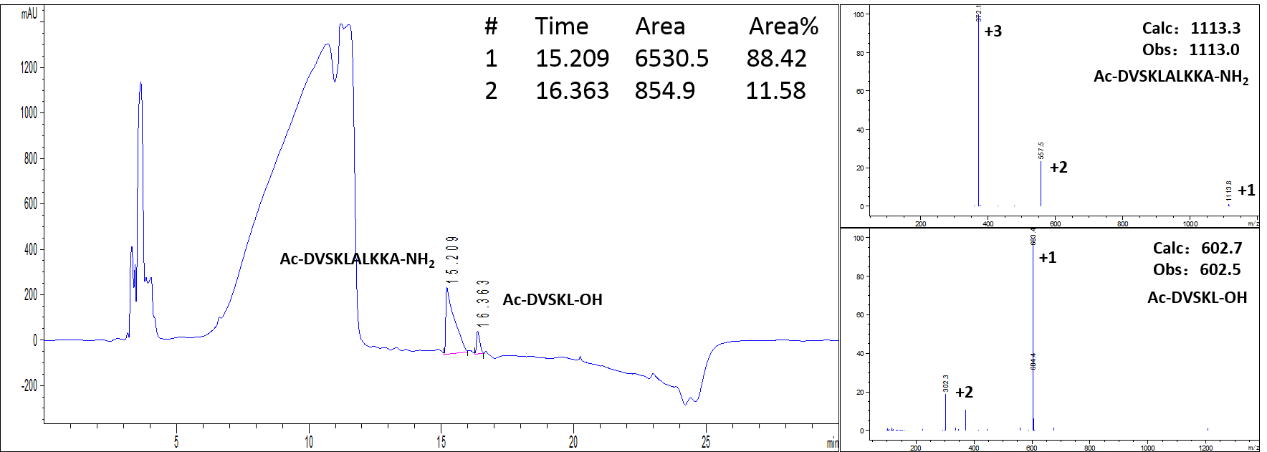

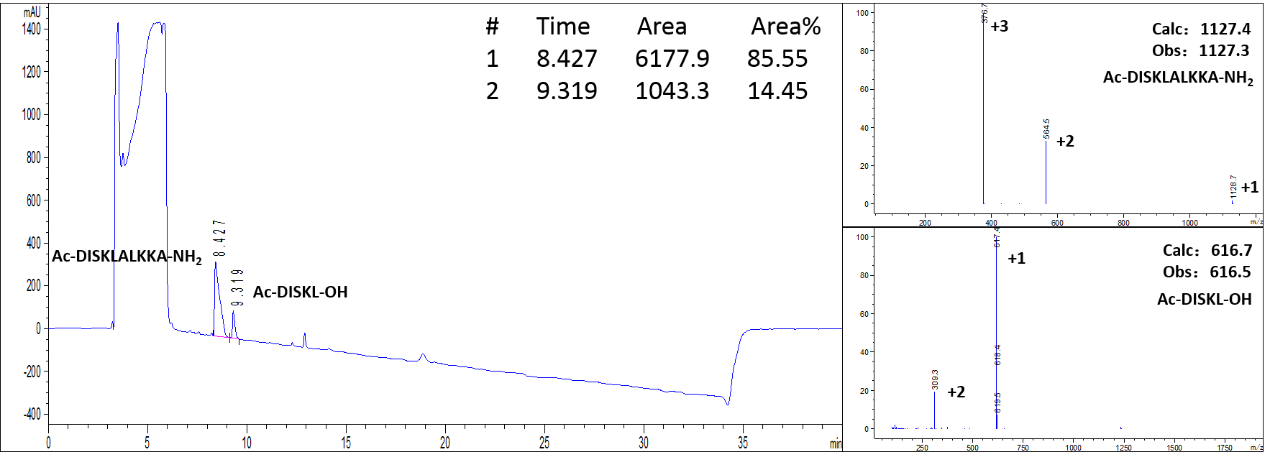

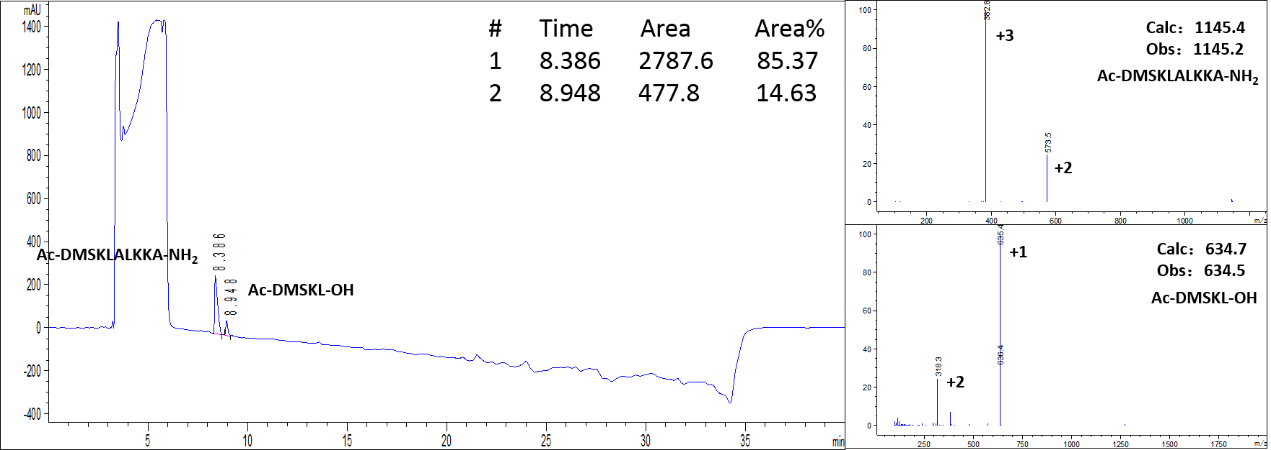

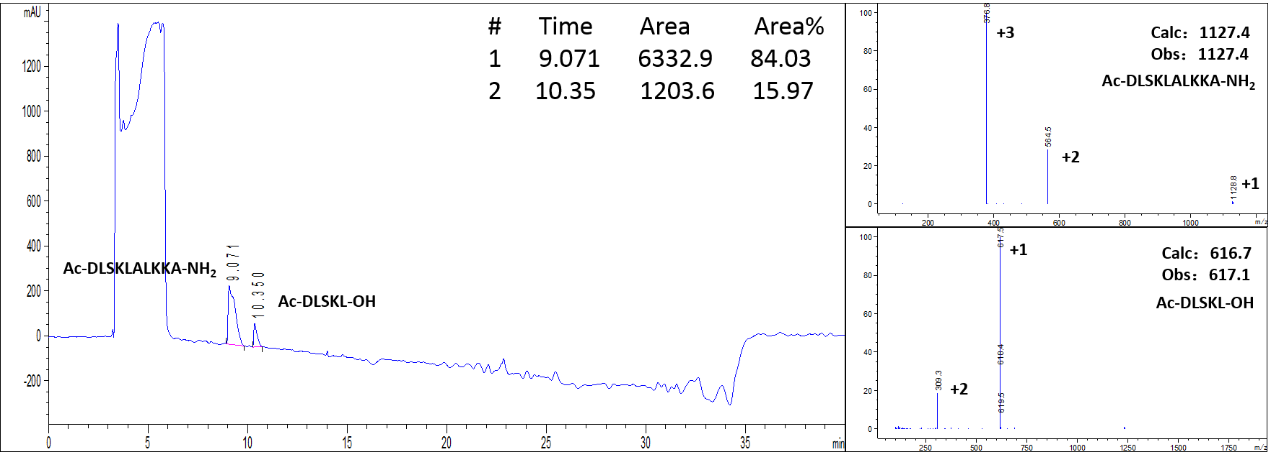


1. **P4 = C, A, W, Y**


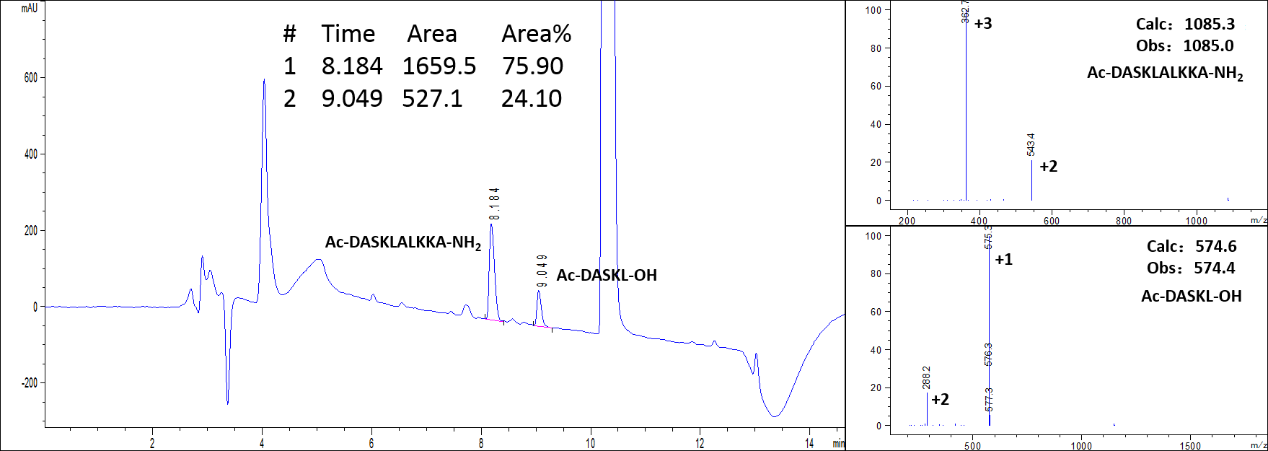

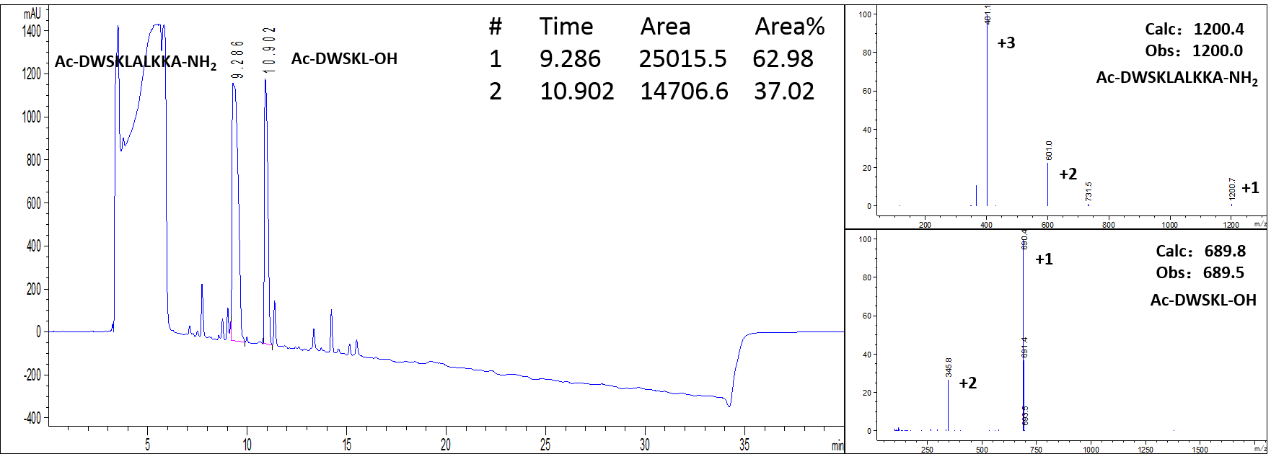

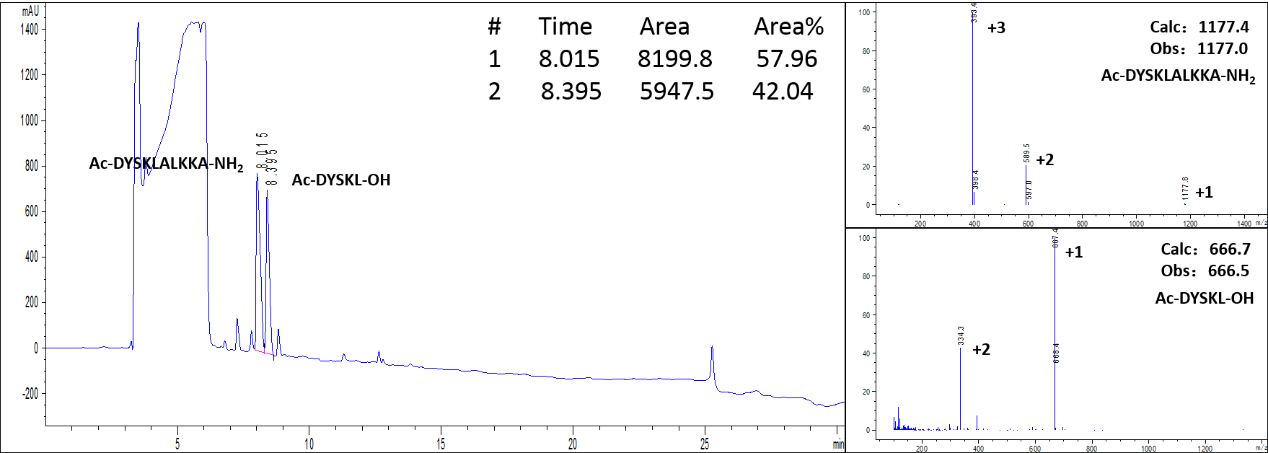

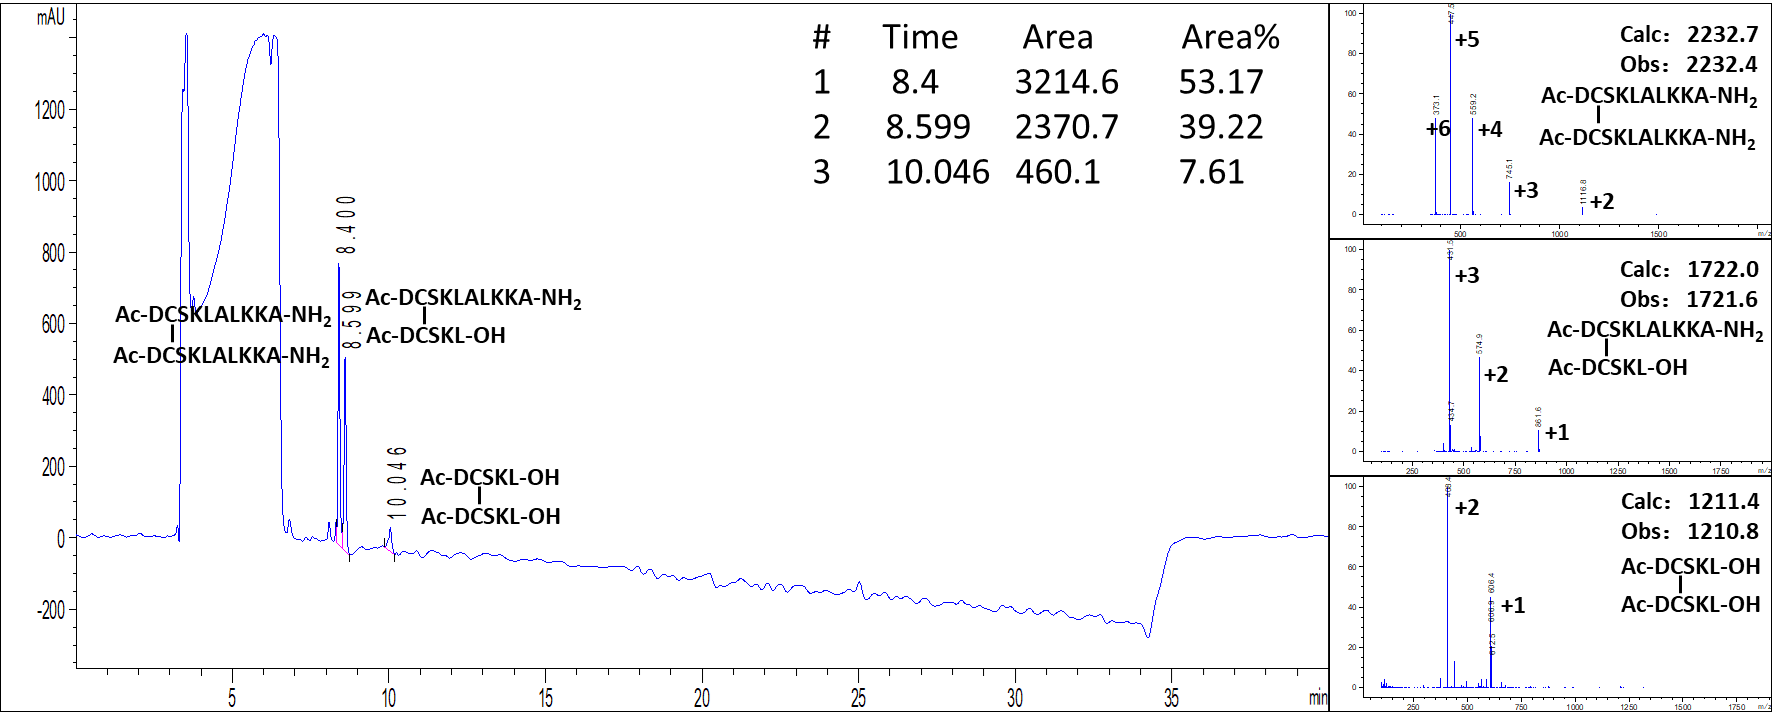


1. **P4 = S, R, Q, D**


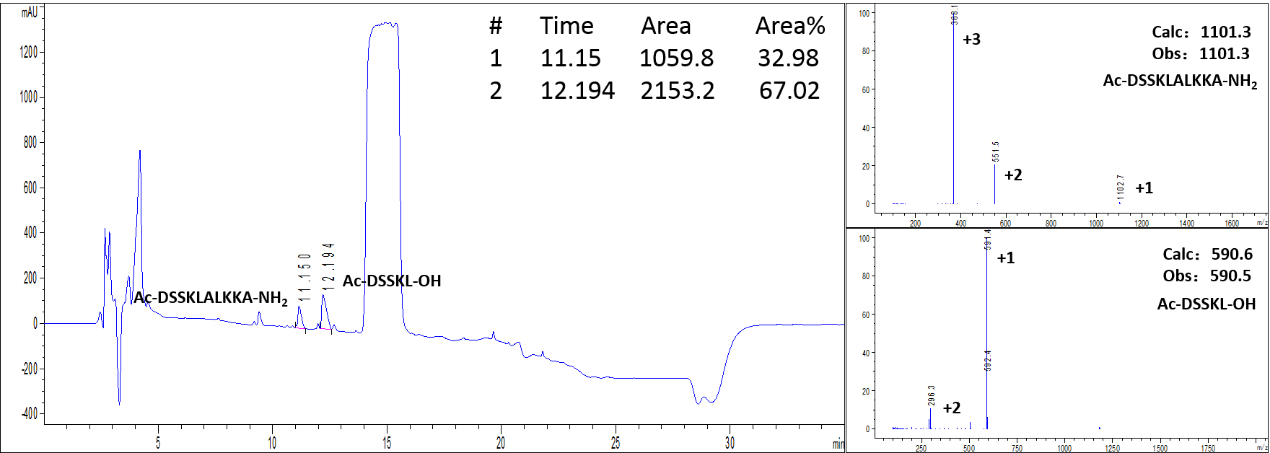

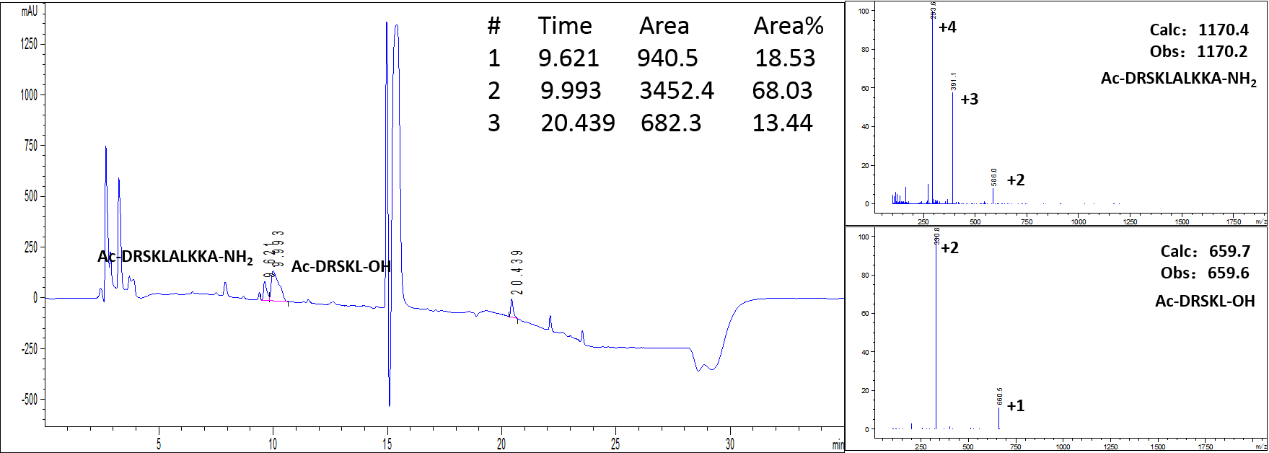

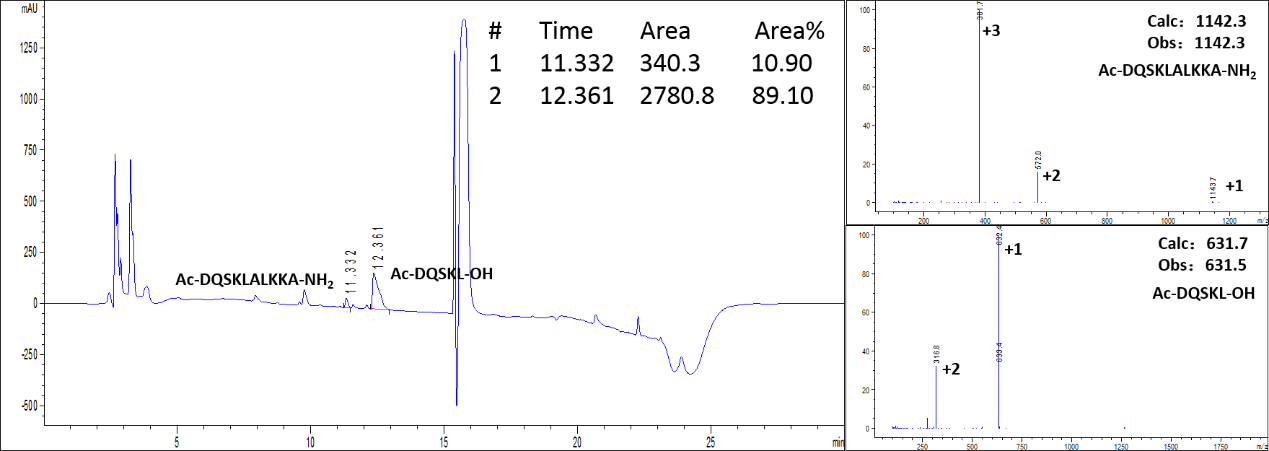

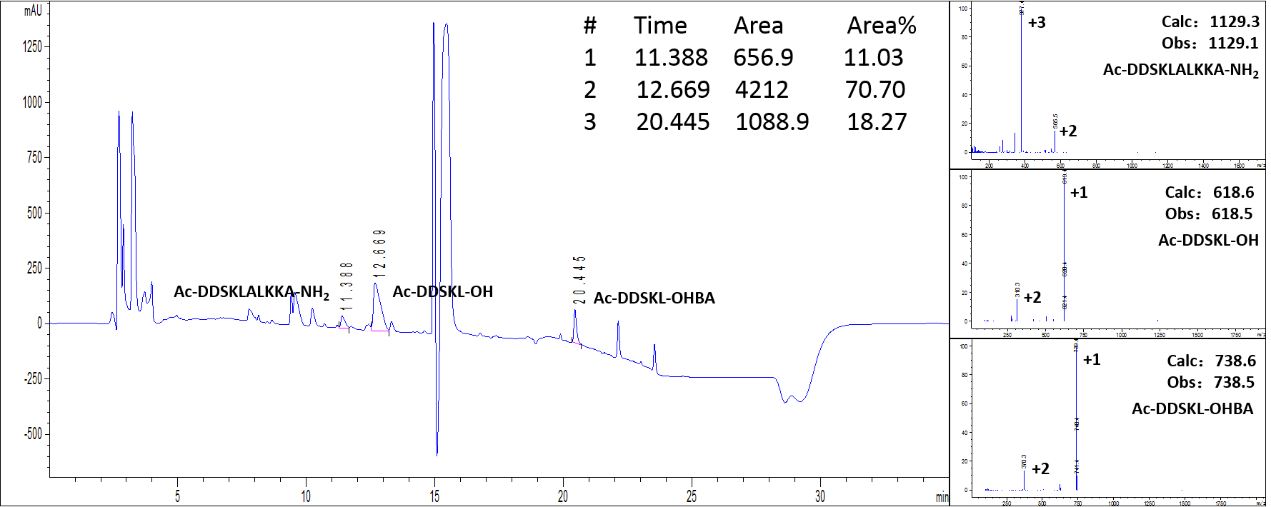


1. **P4 = N, G, H, E**


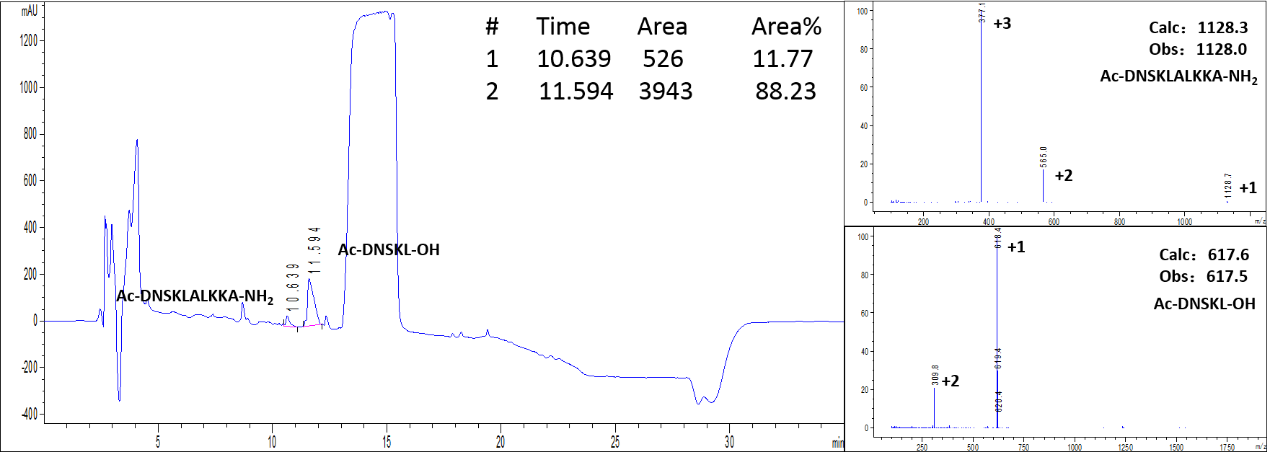

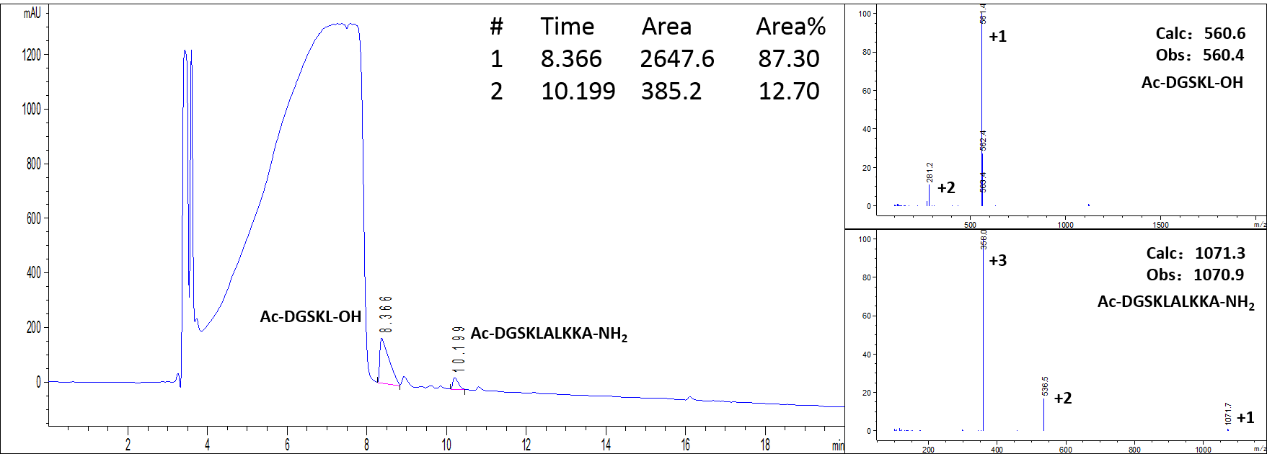

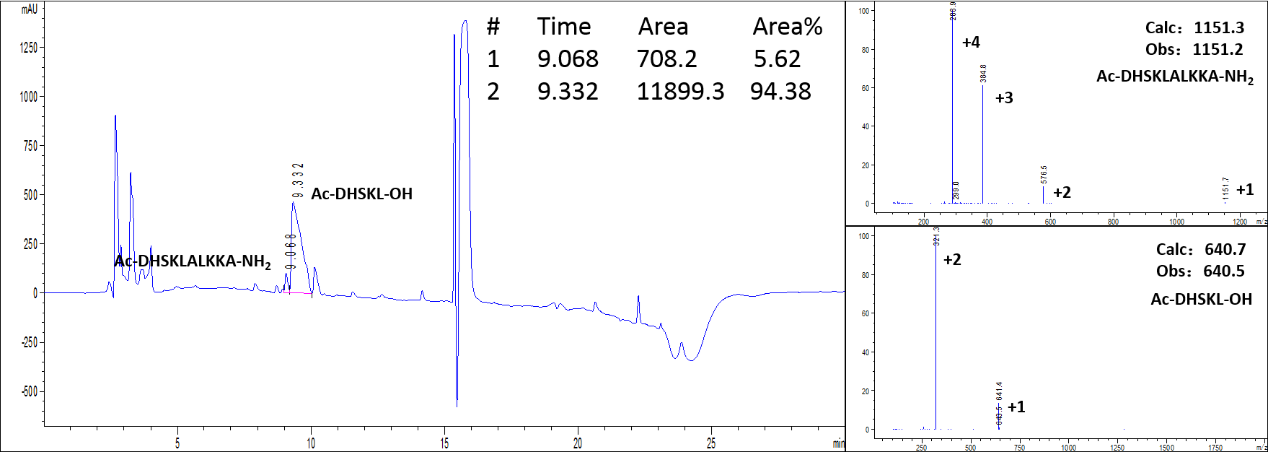

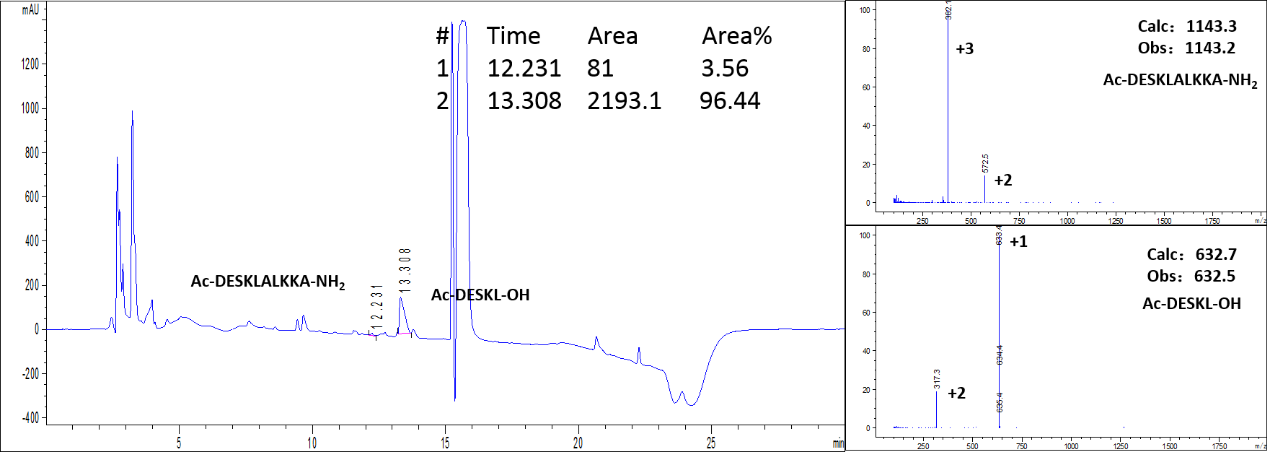


1. **P4 = K, P, T**


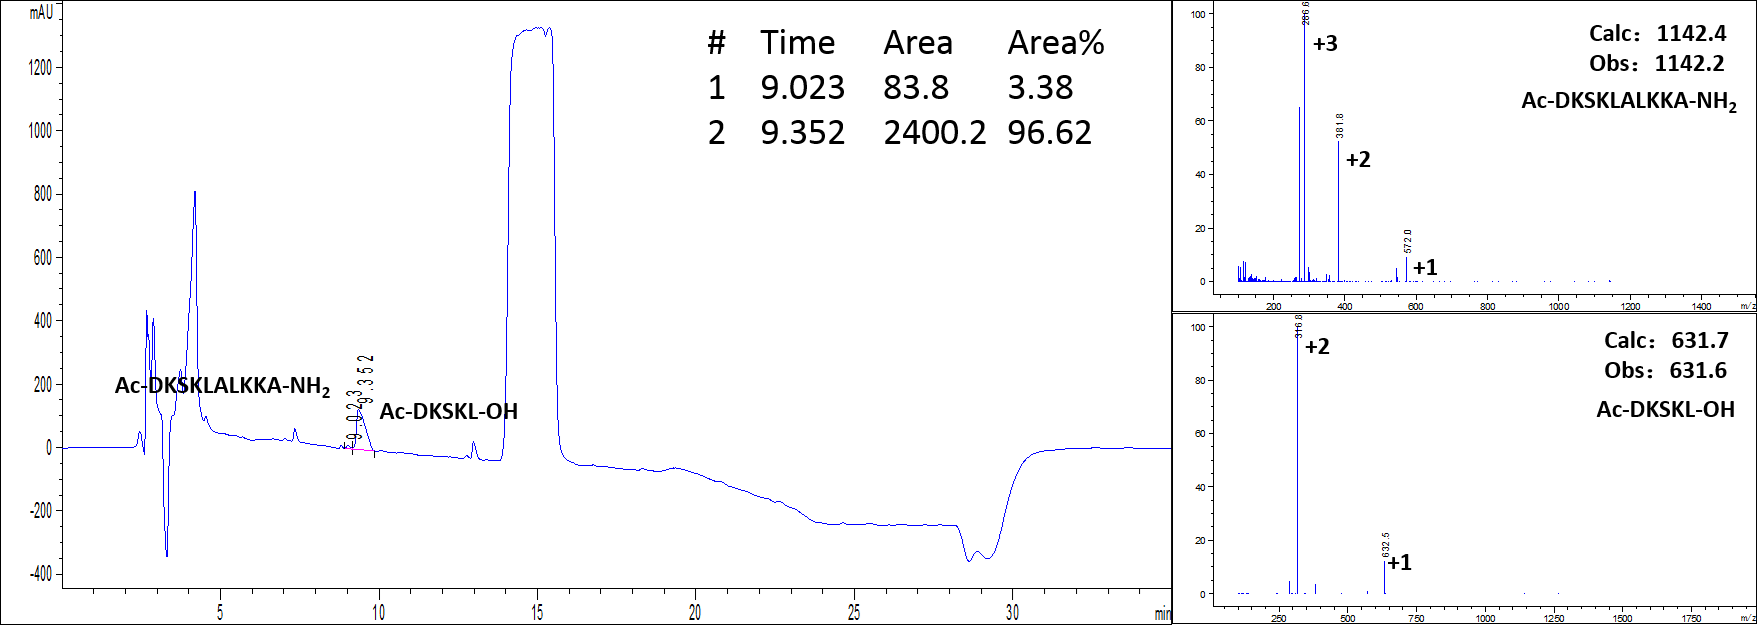

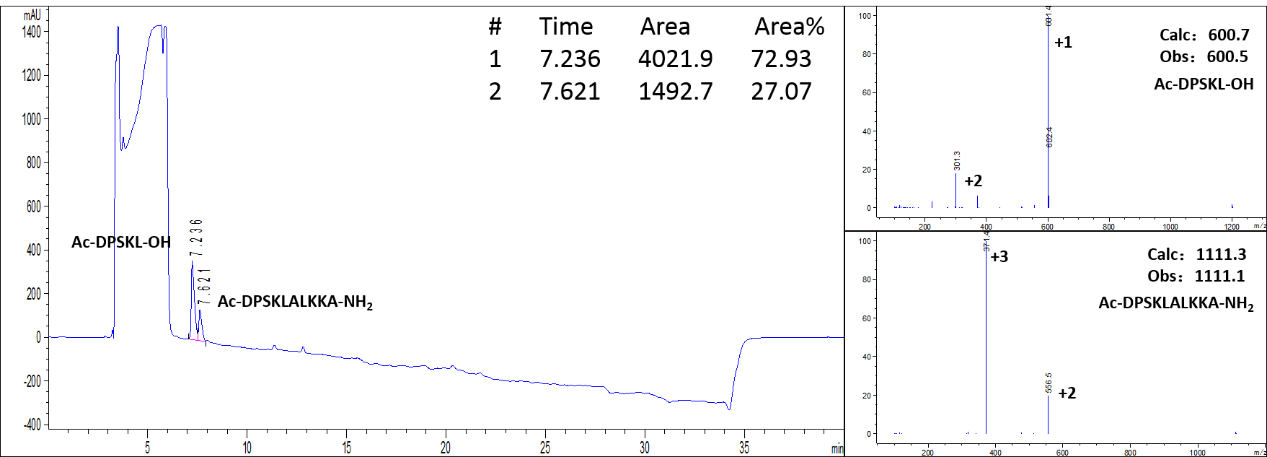

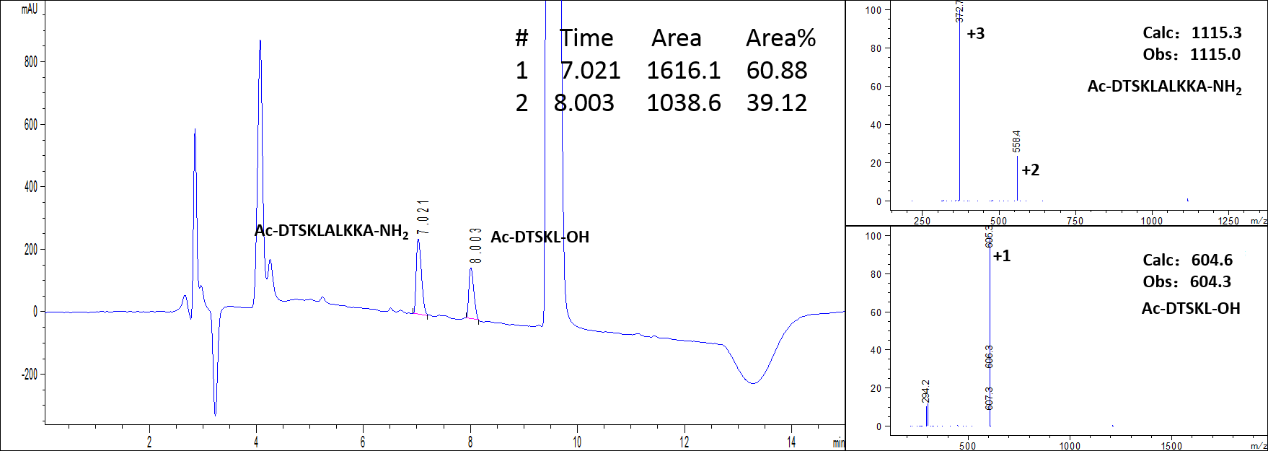


## 2.2 screening of Omniligase-1 P3 substrates

1. **P3 = F, V, I, M**


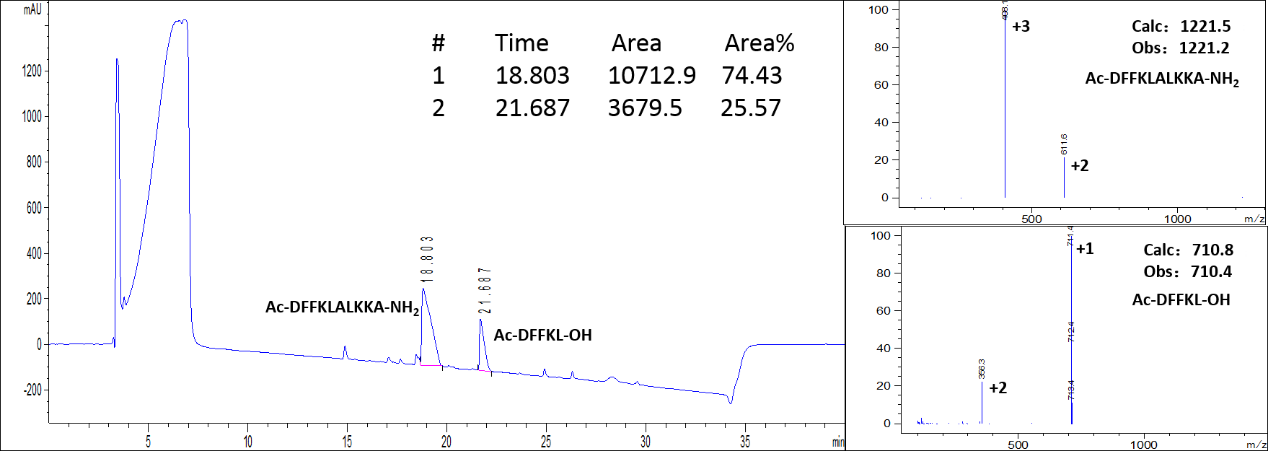

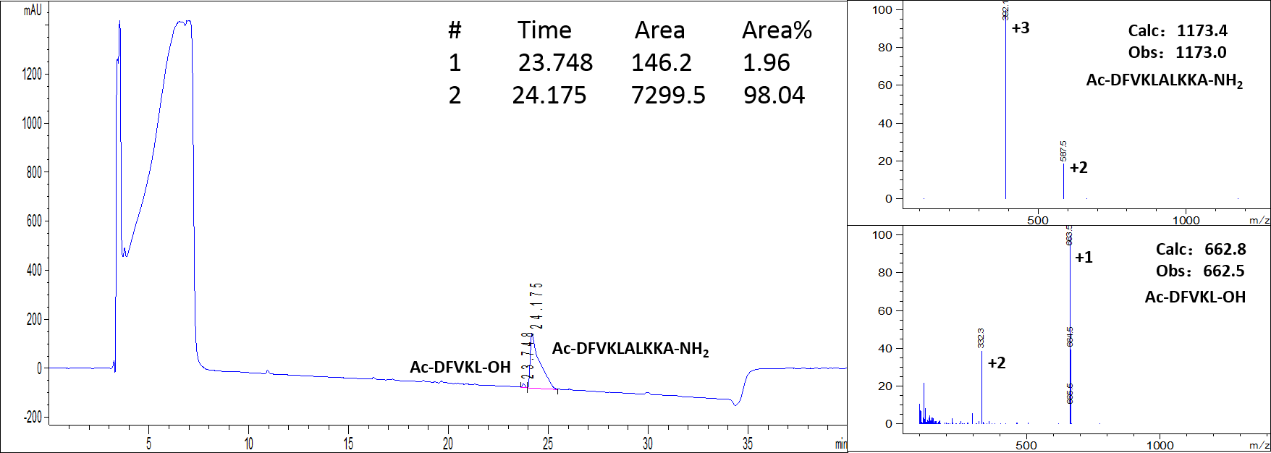

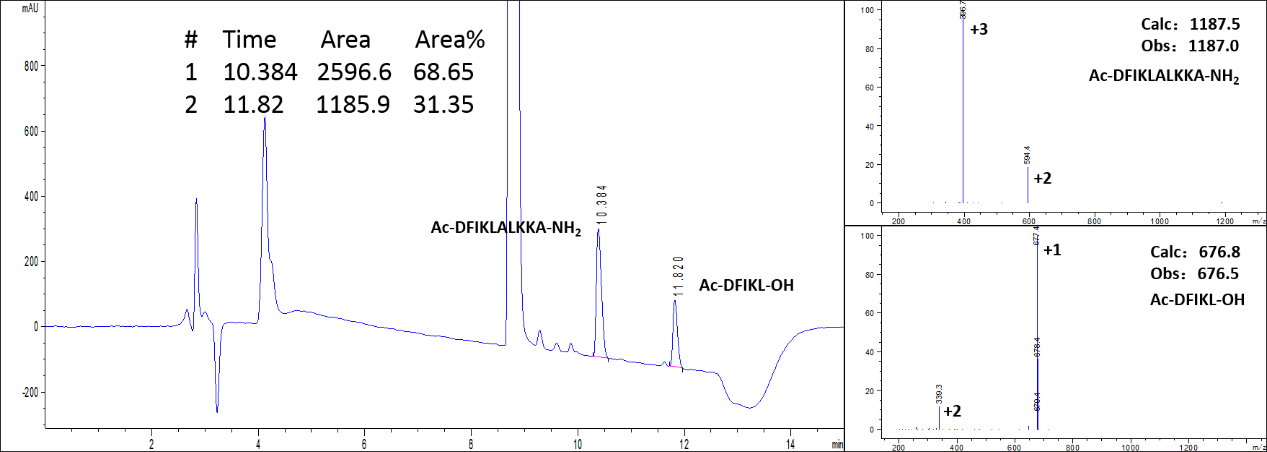

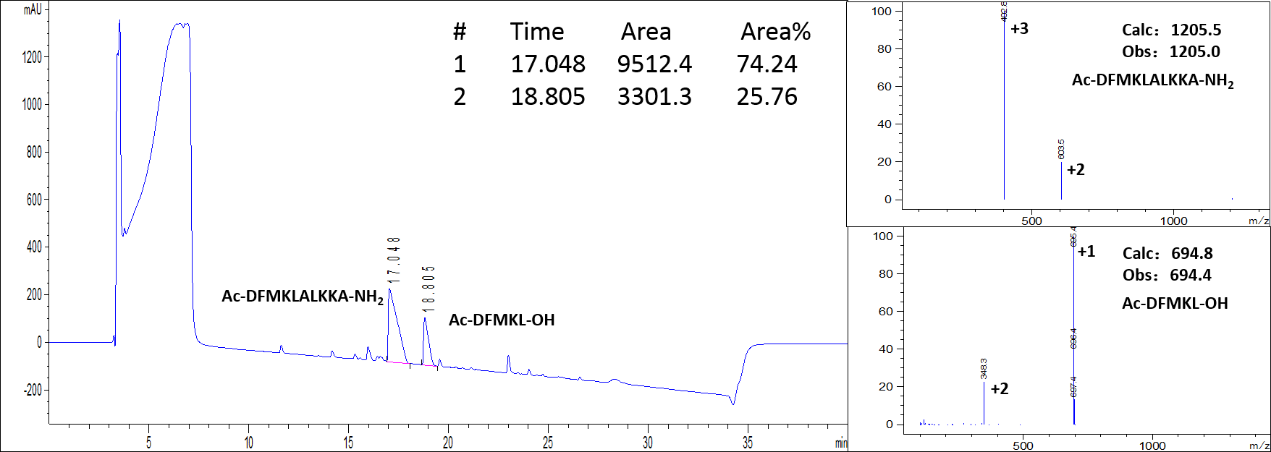


1. **P3 = K, C, A, W**


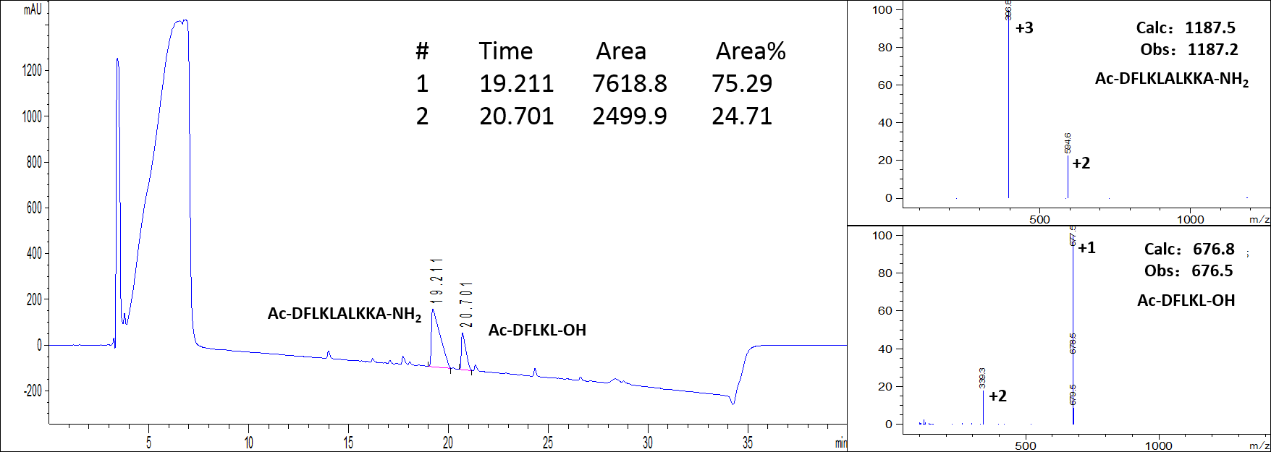

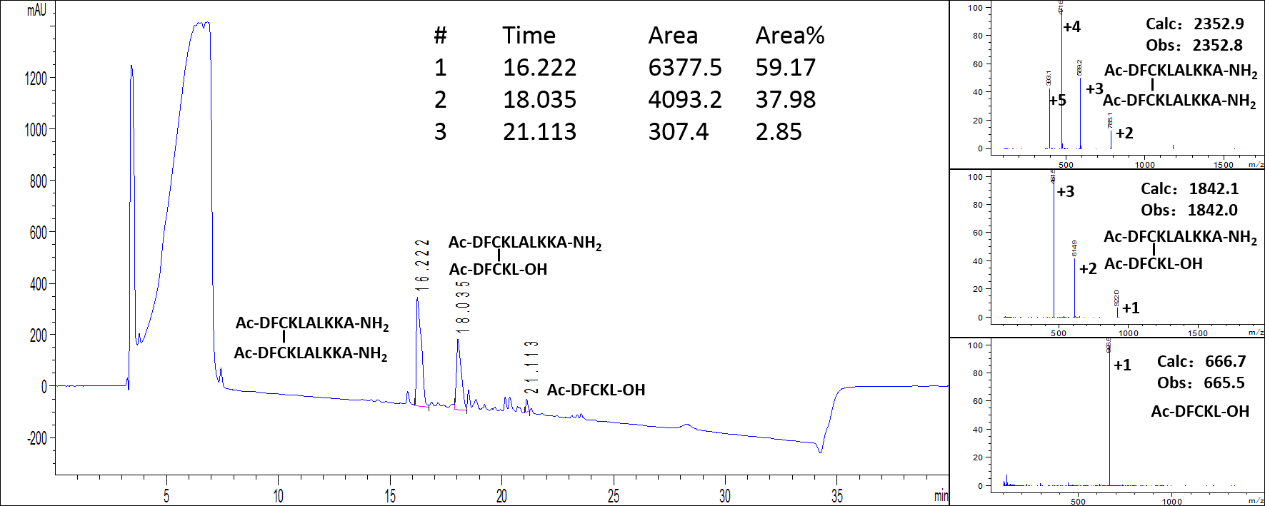

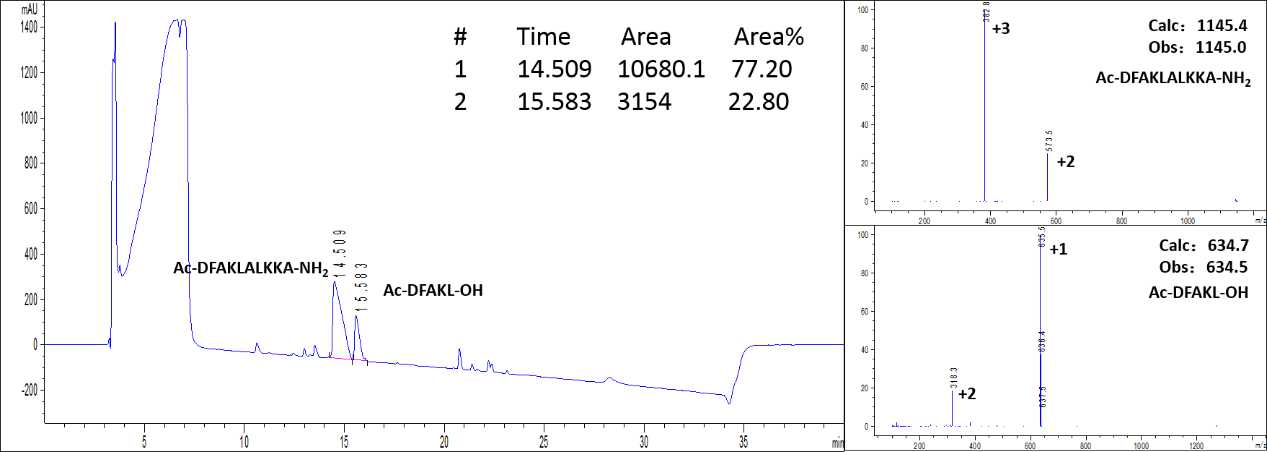

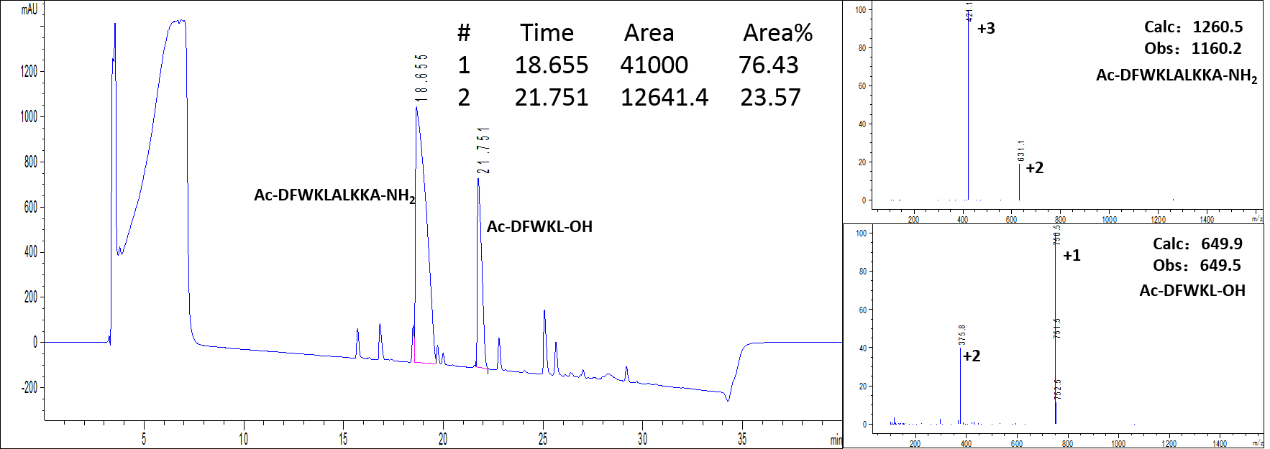


1. **P3 = Y, R, Q, D**


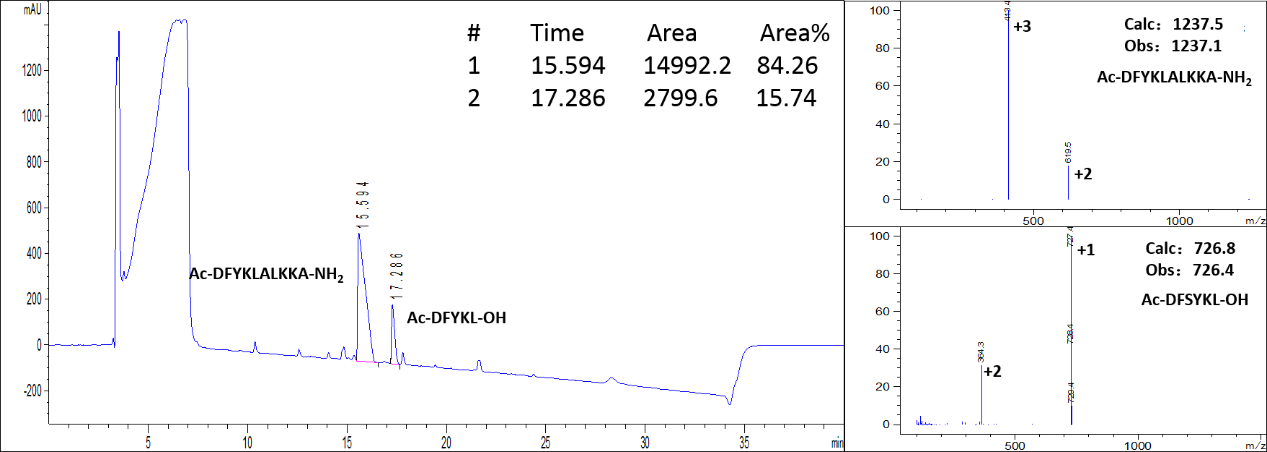

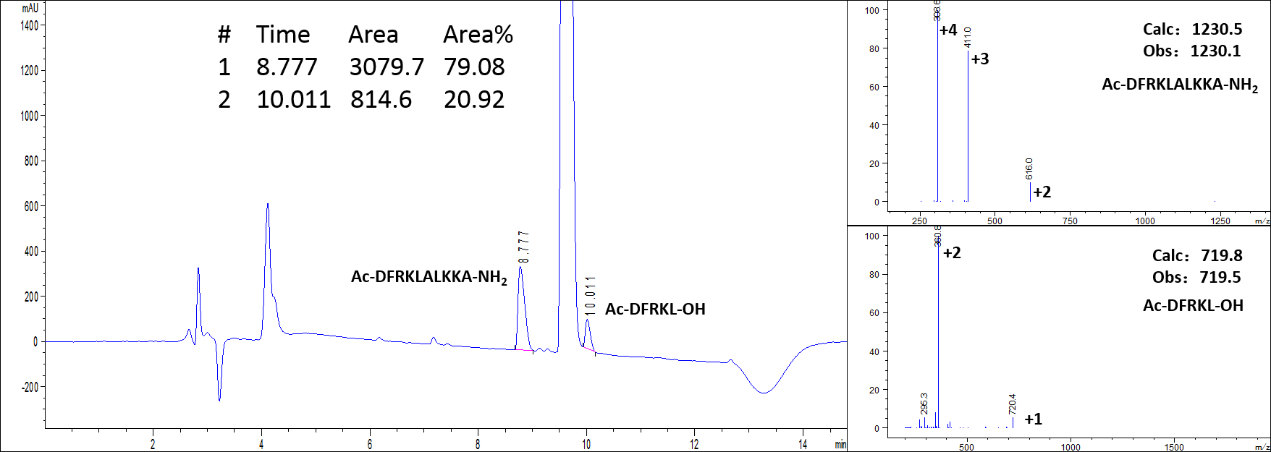

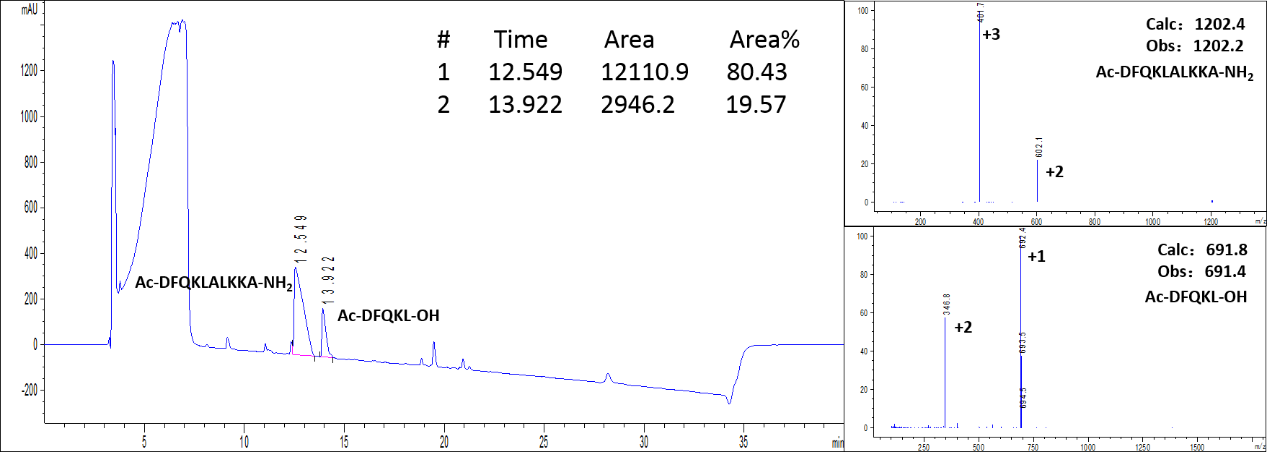

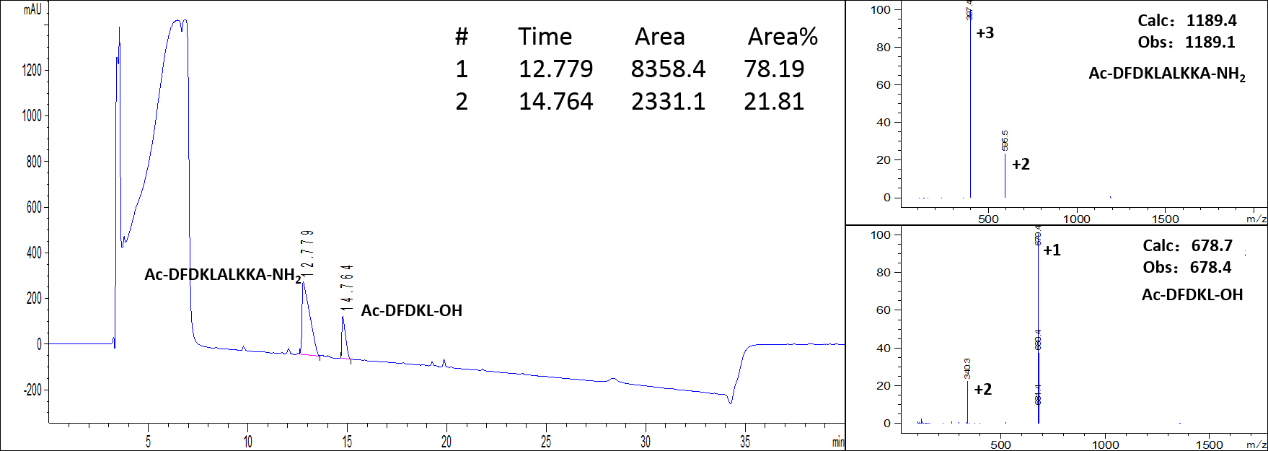


1. **P3 = N, G, H, E**


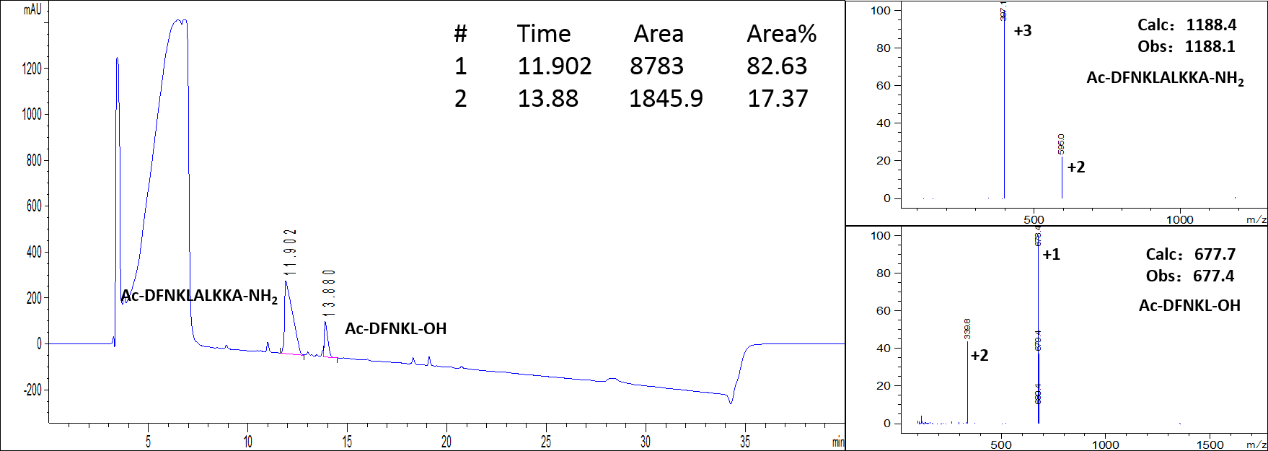

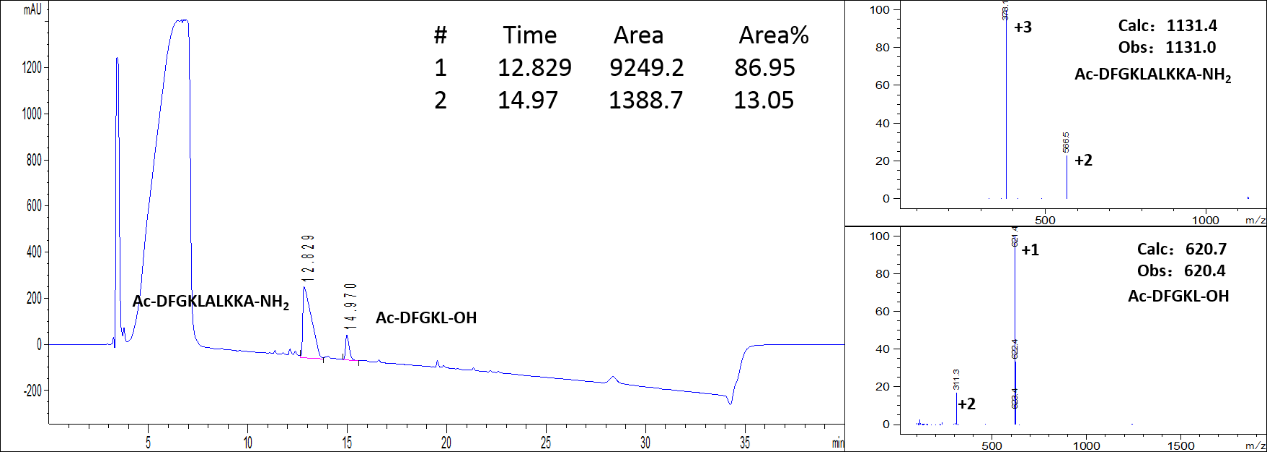

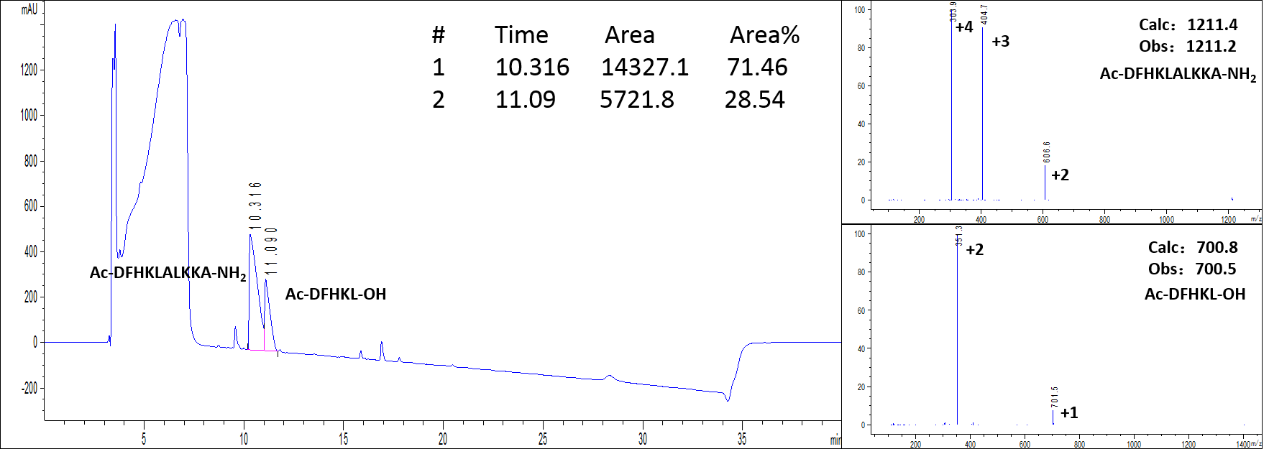

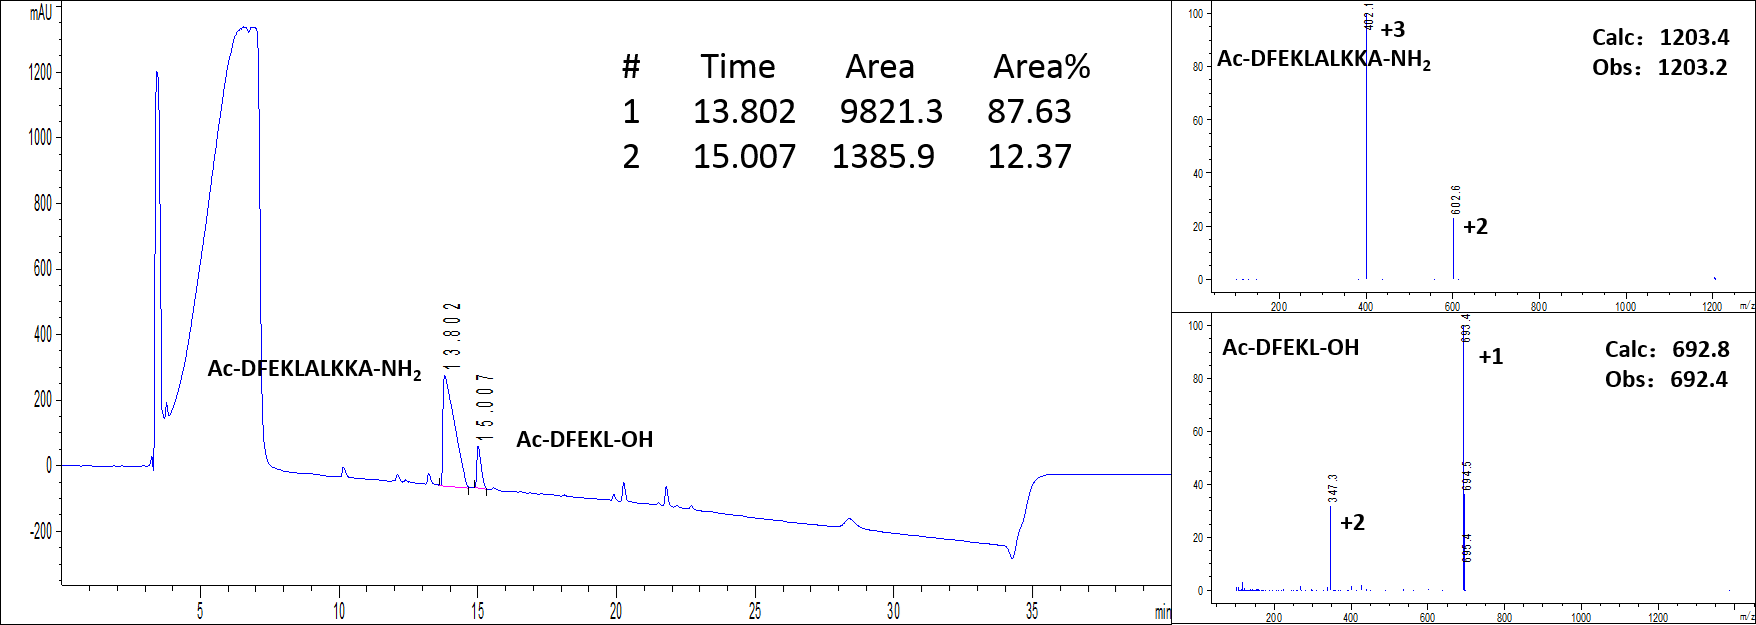


1. **P3 = K, P, T**


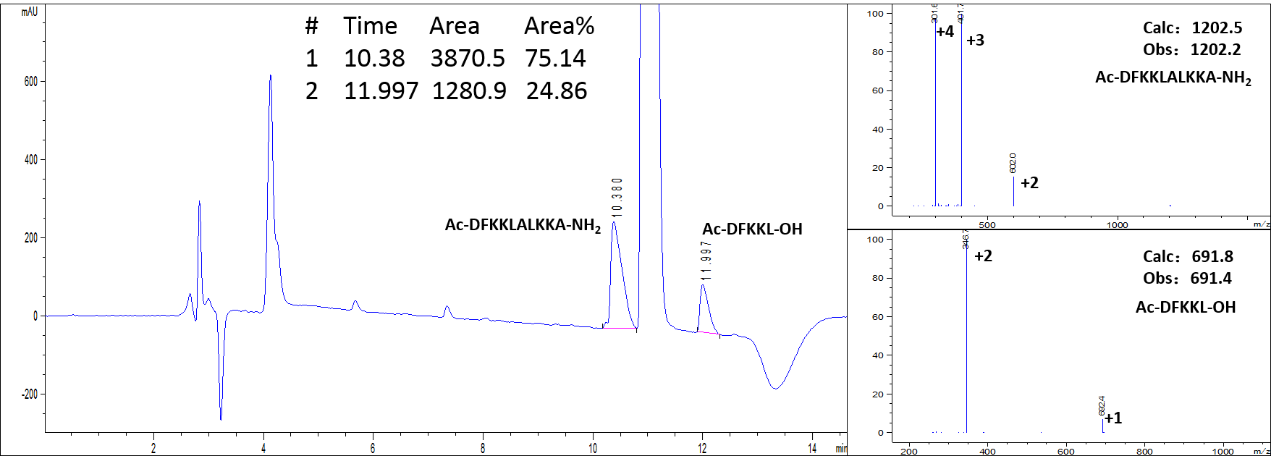

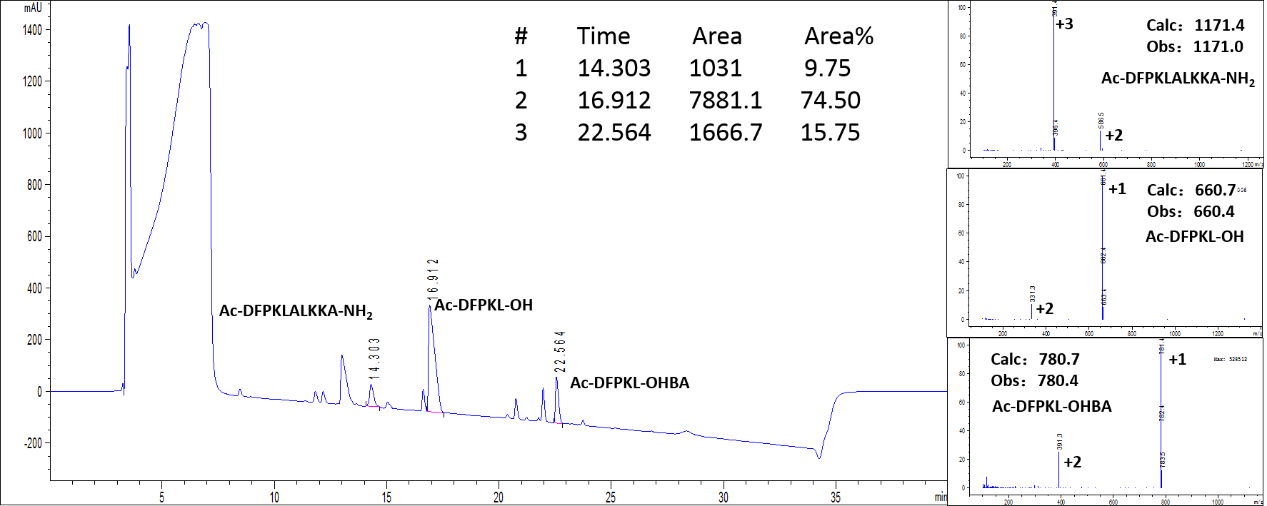

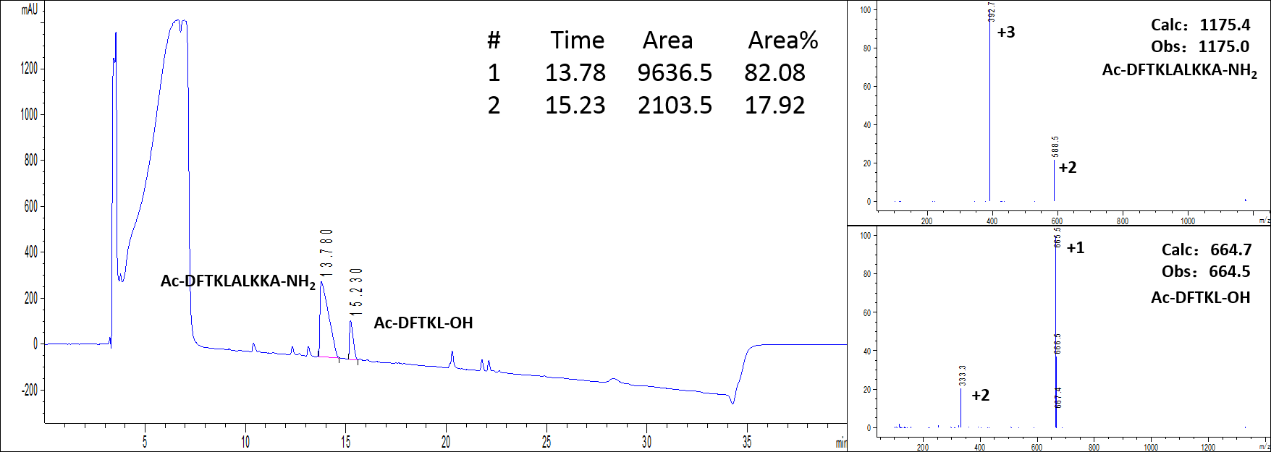


## 2.3 screening of Omniligase-1 P2 substrates

1. **P2 = F, V, I, M**


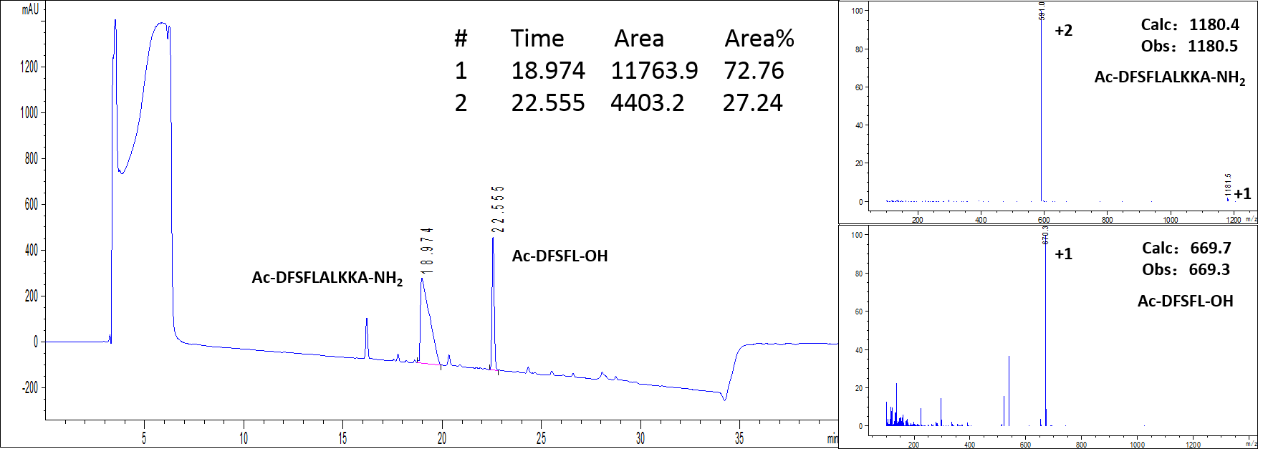

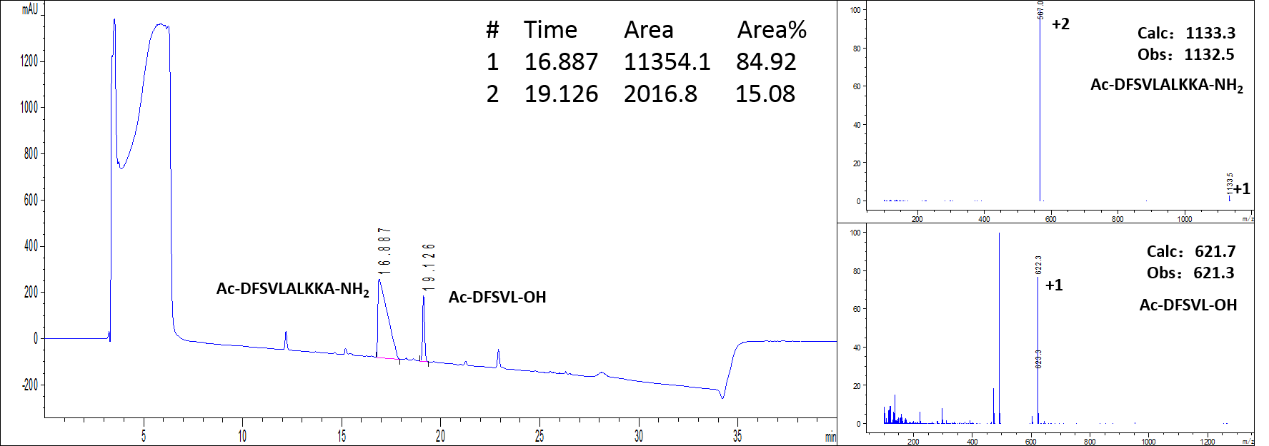

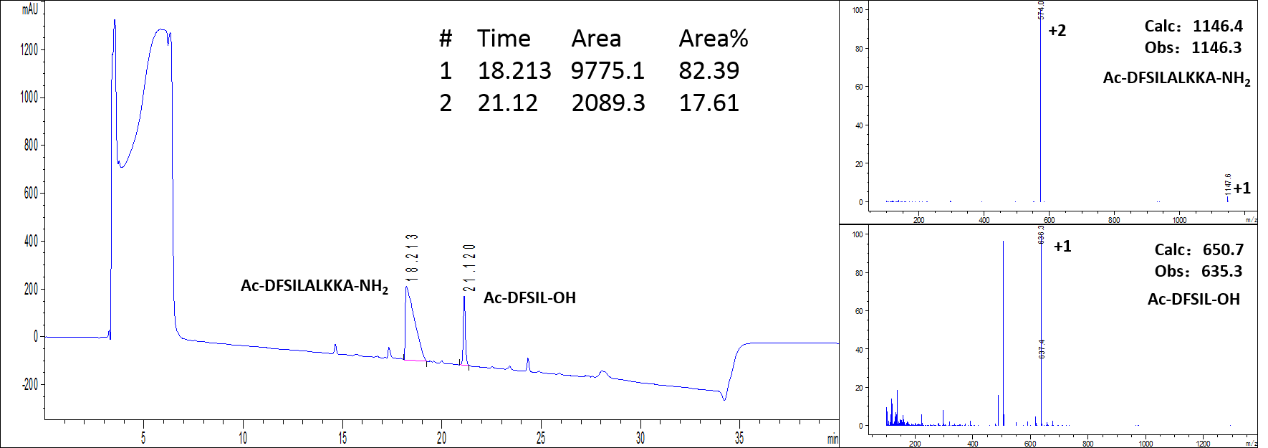

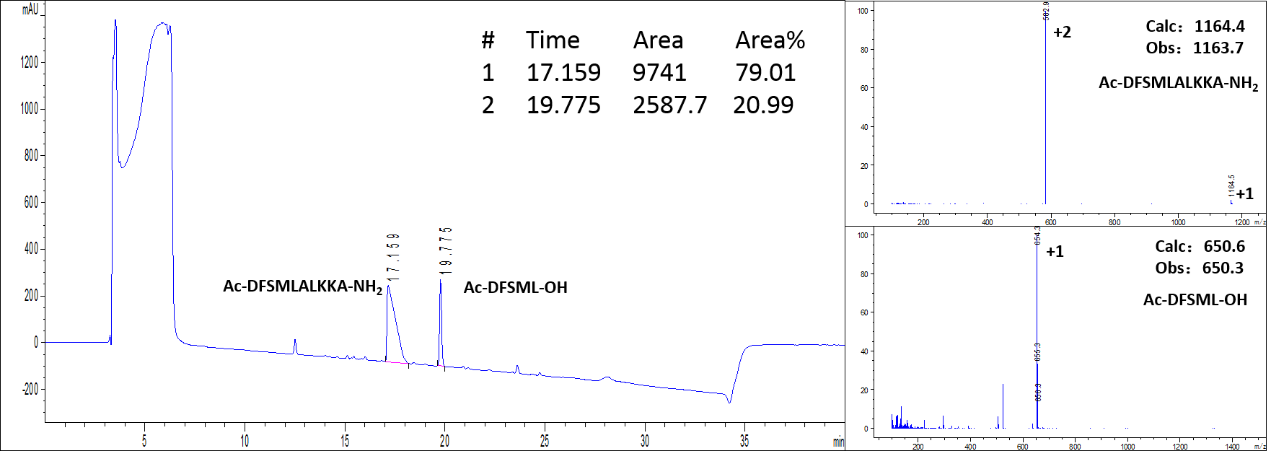


1. **P2 = L, C, A, W**


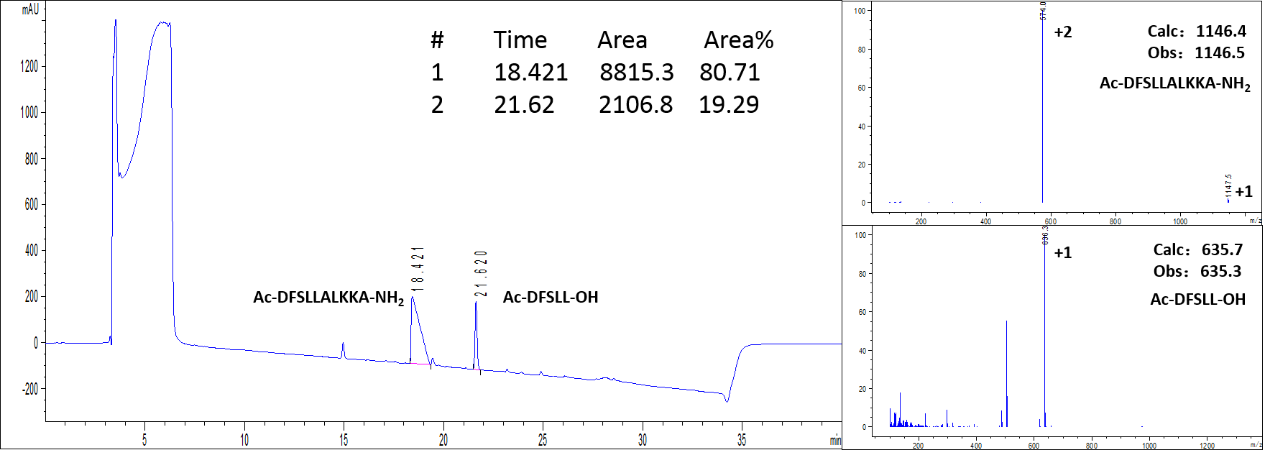

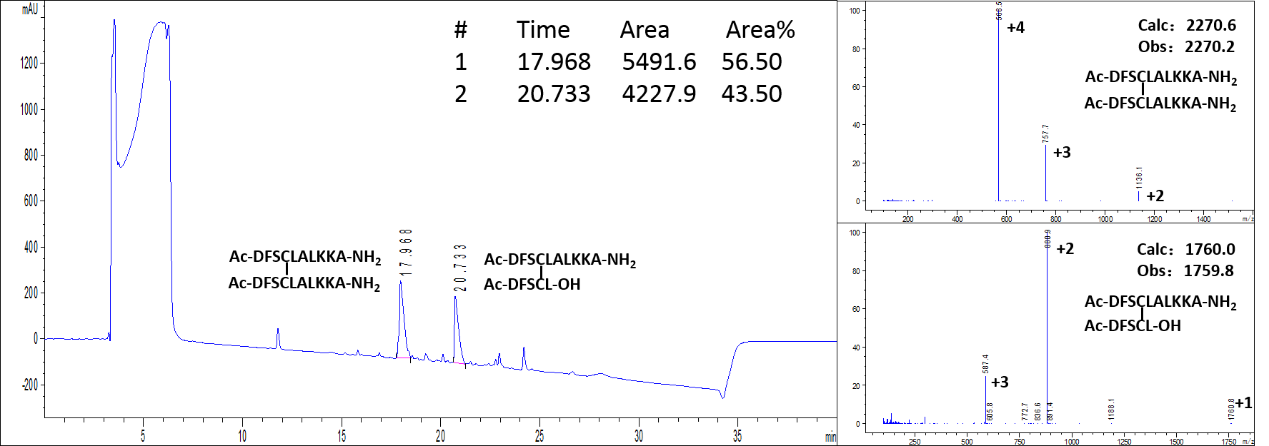

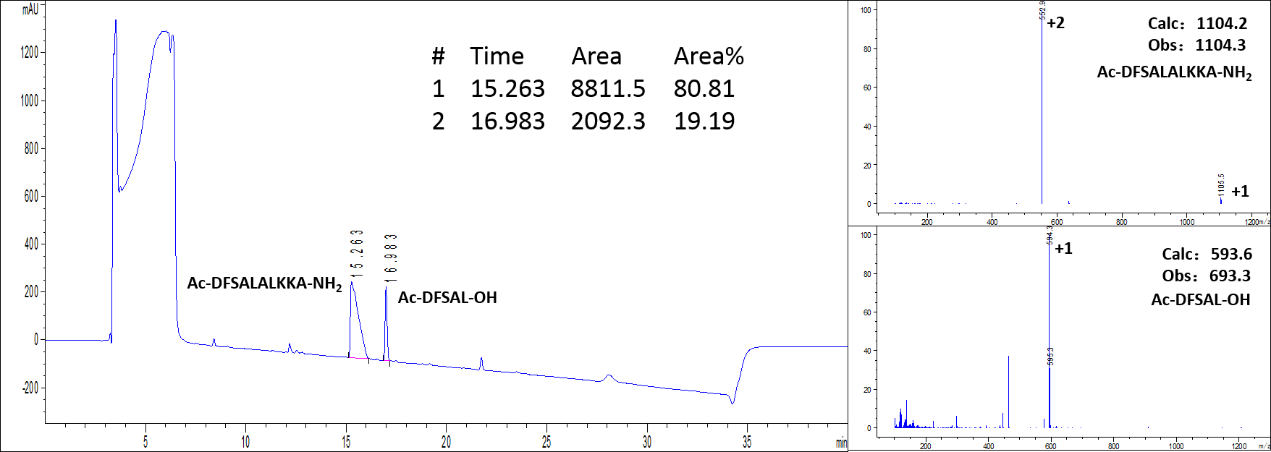

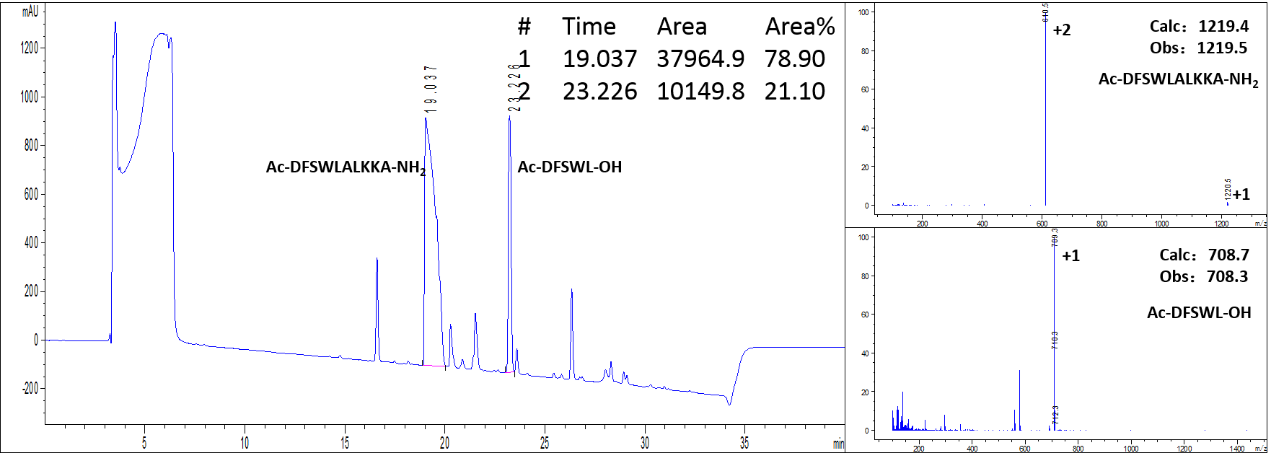


1. **P2 = Y, S, R, Q**


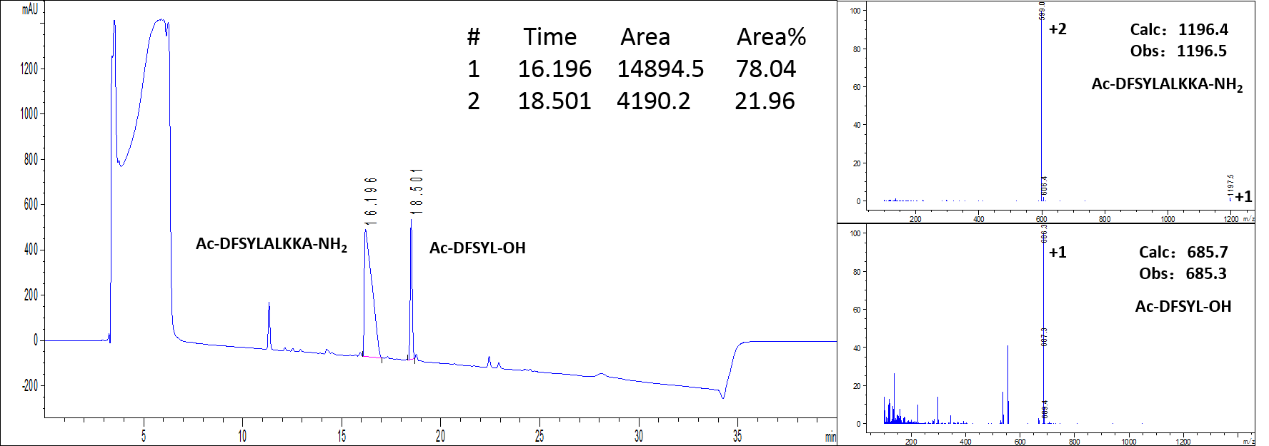

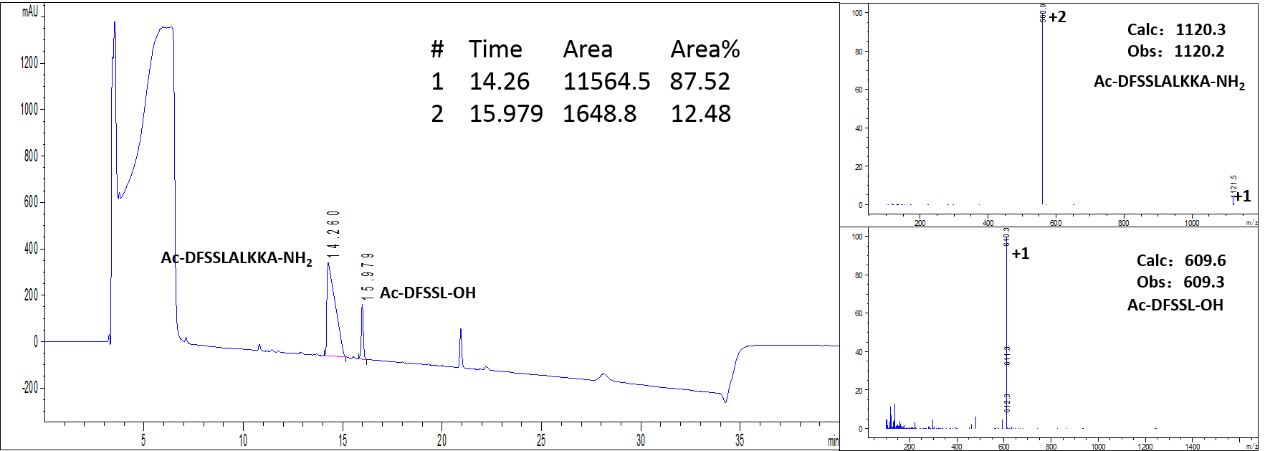

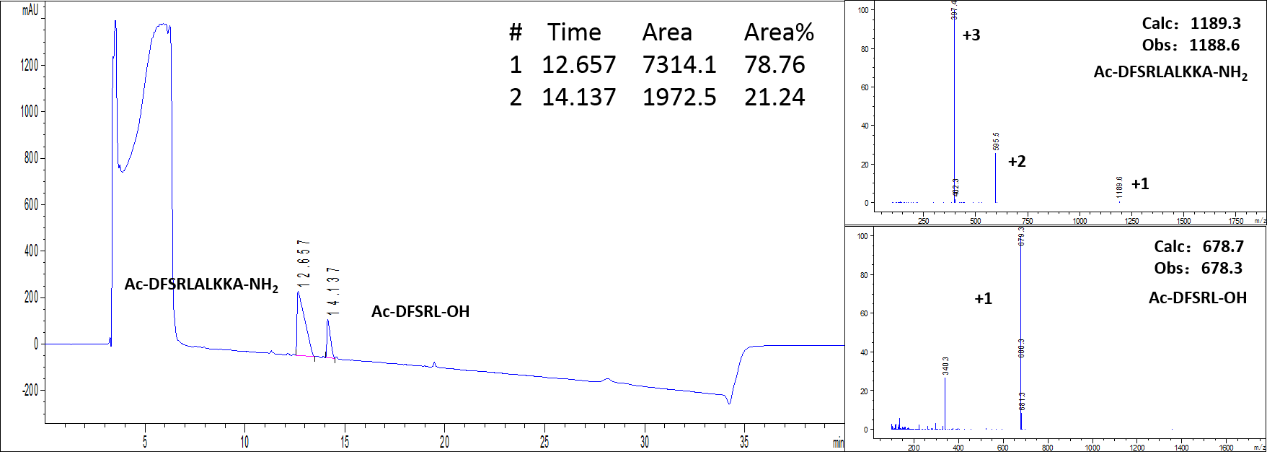

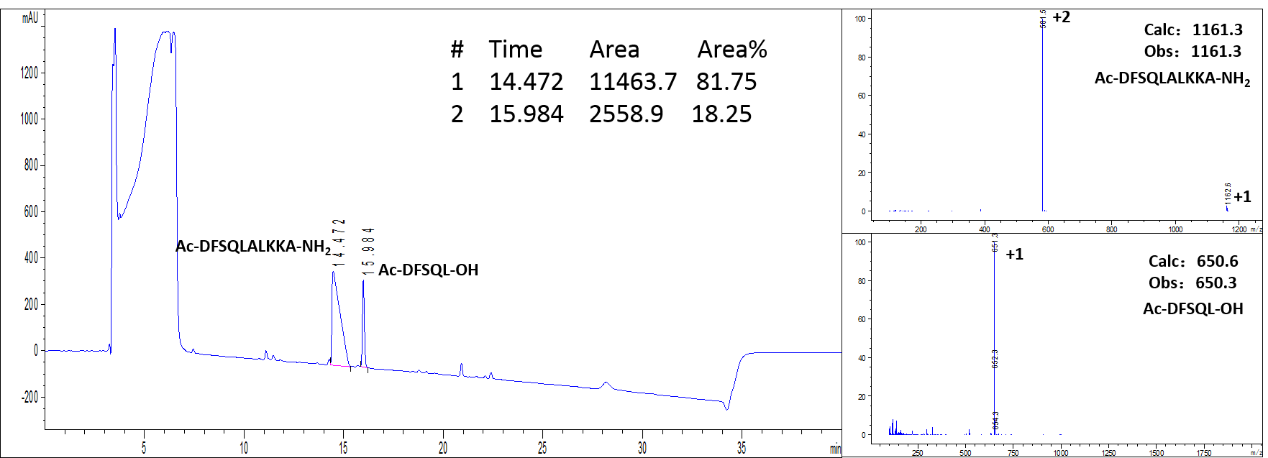


1. **P2 = D, N, G, H**


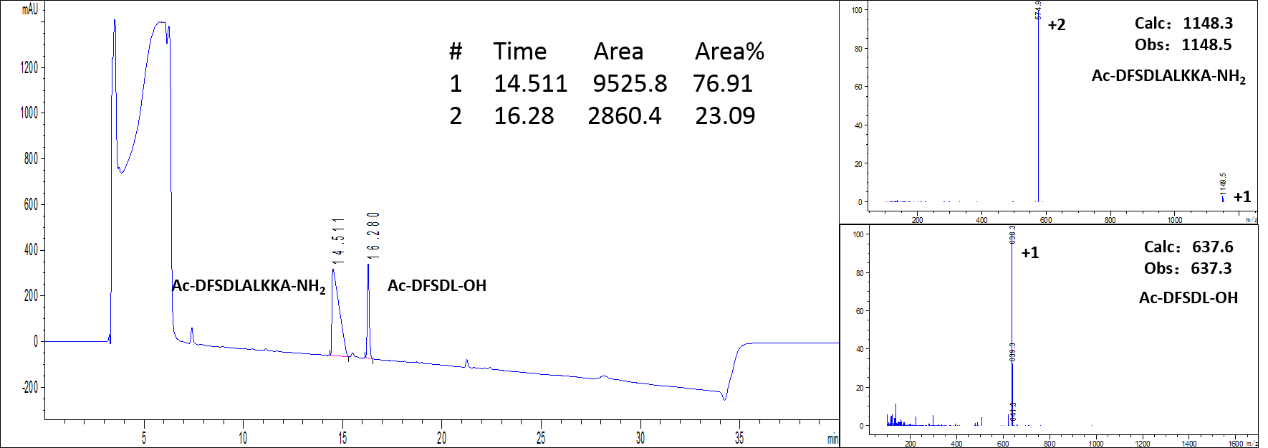

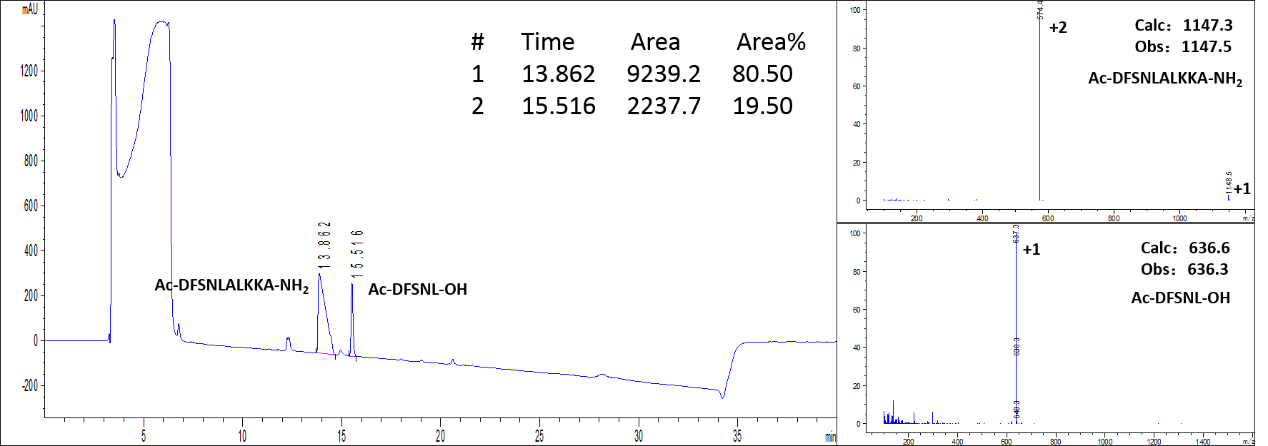

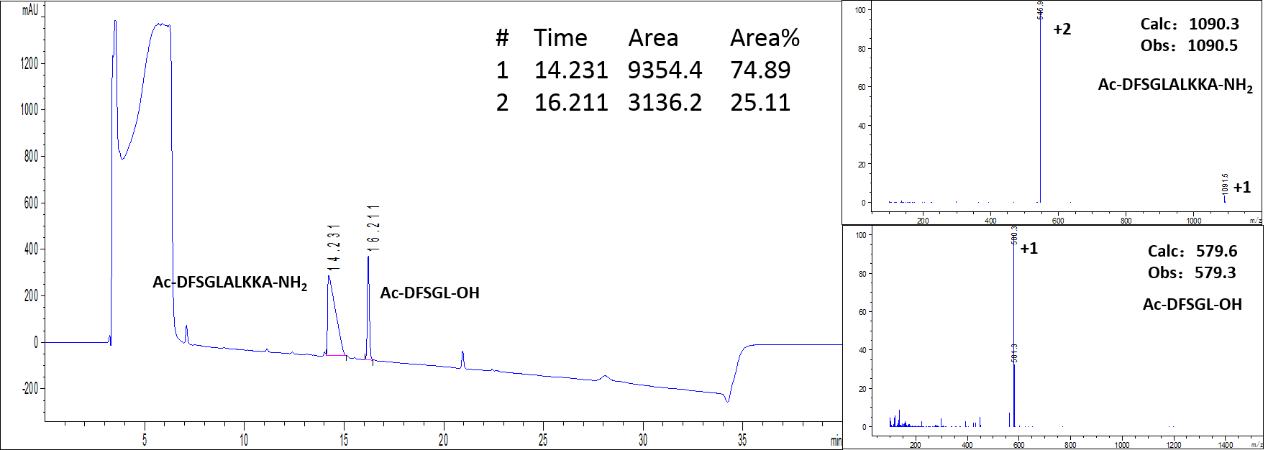

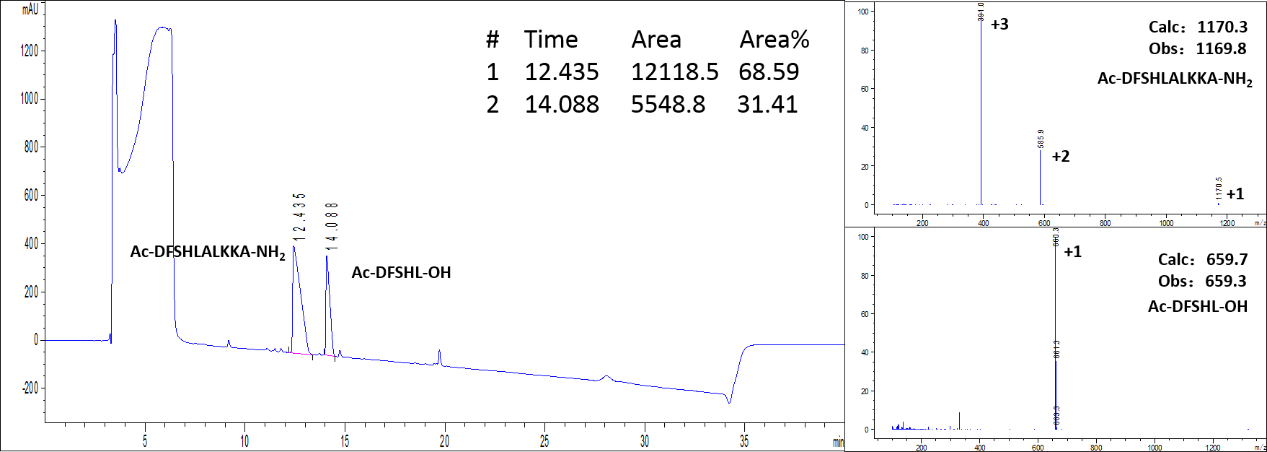


1. **P2 = E, P, T**


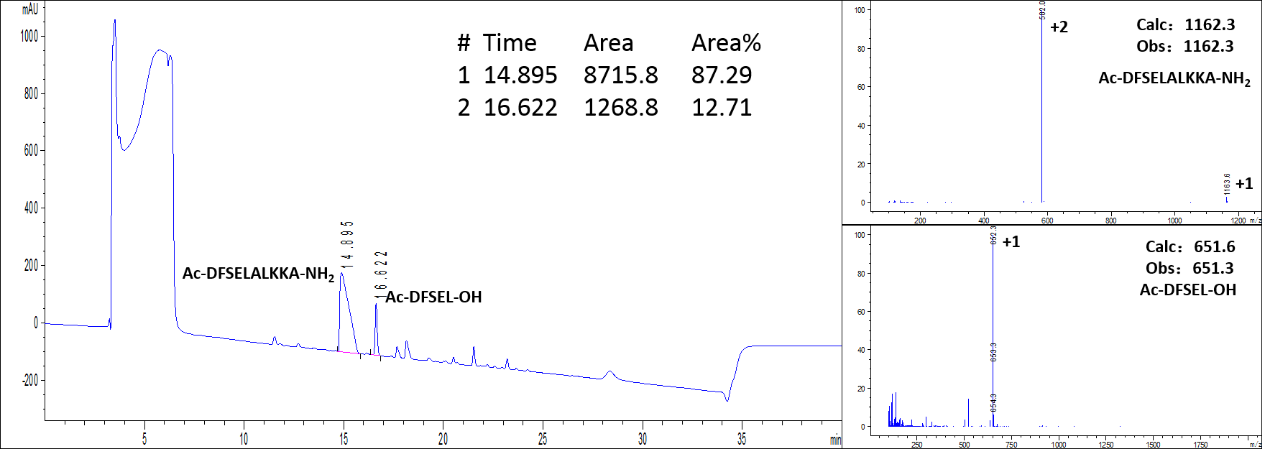

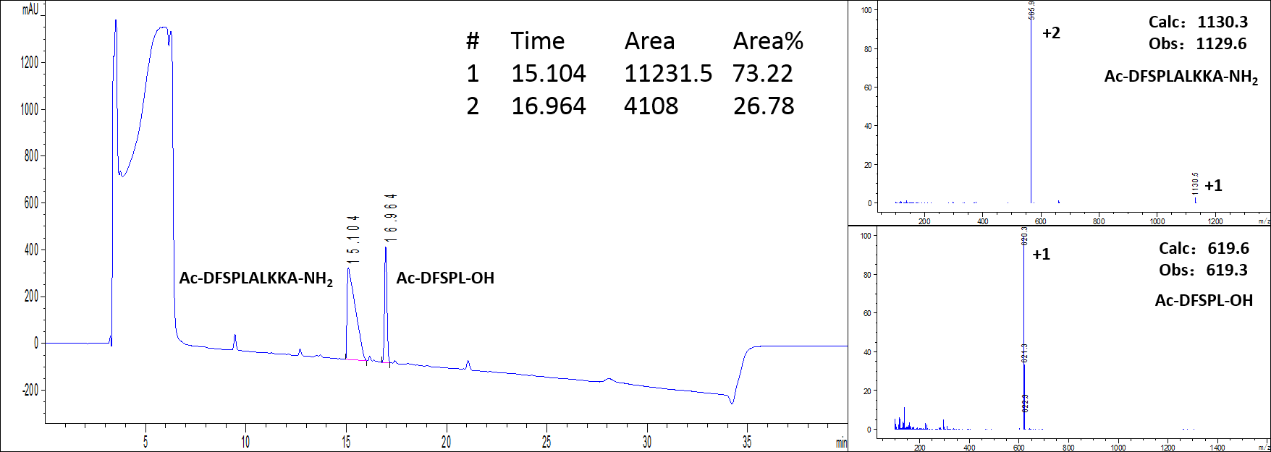

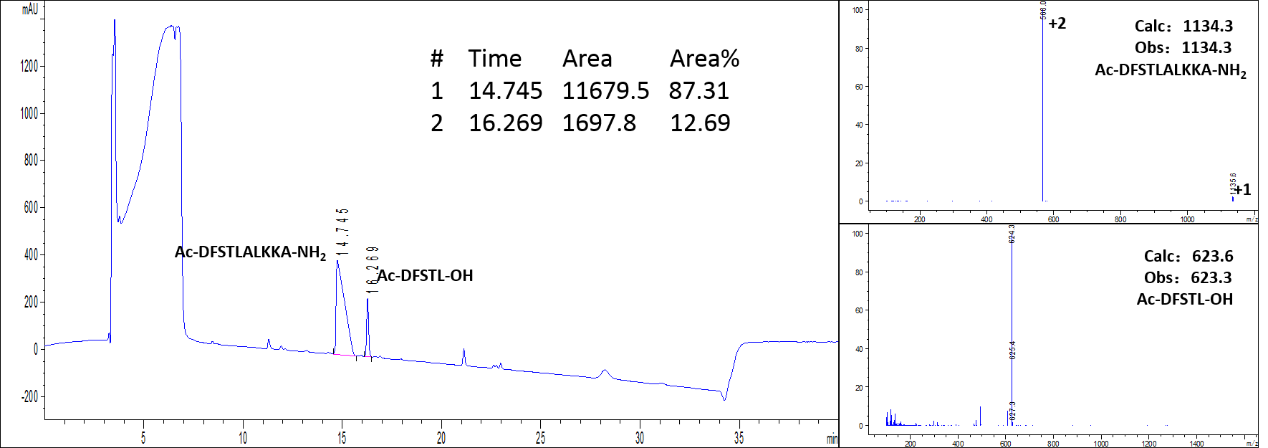


## 2.4 screening of Omniligase-1 P1 substrates

1. **P1 = C, R, D, P**


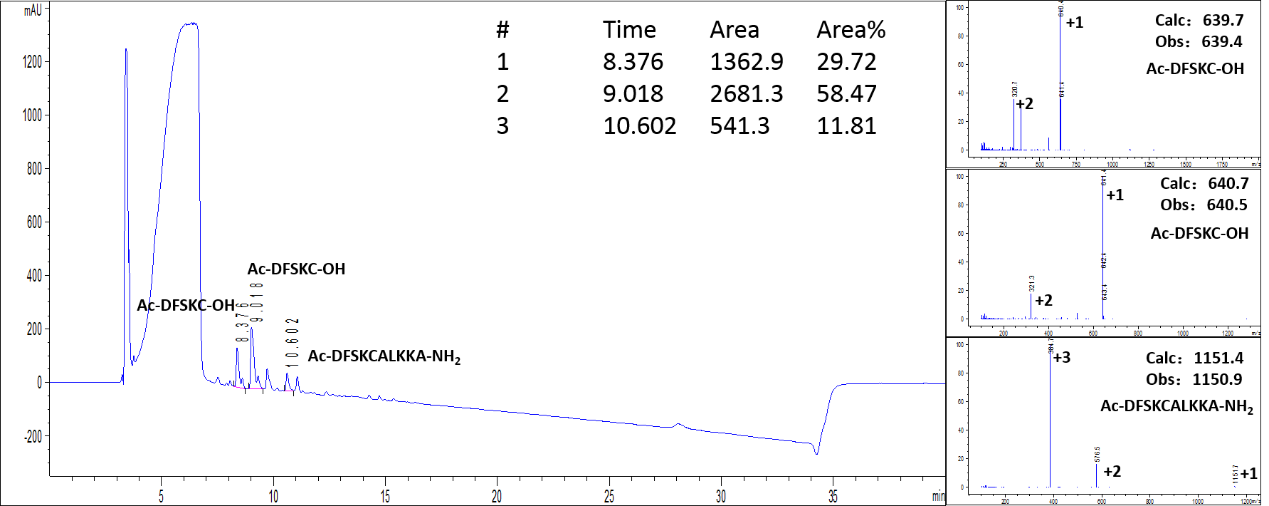

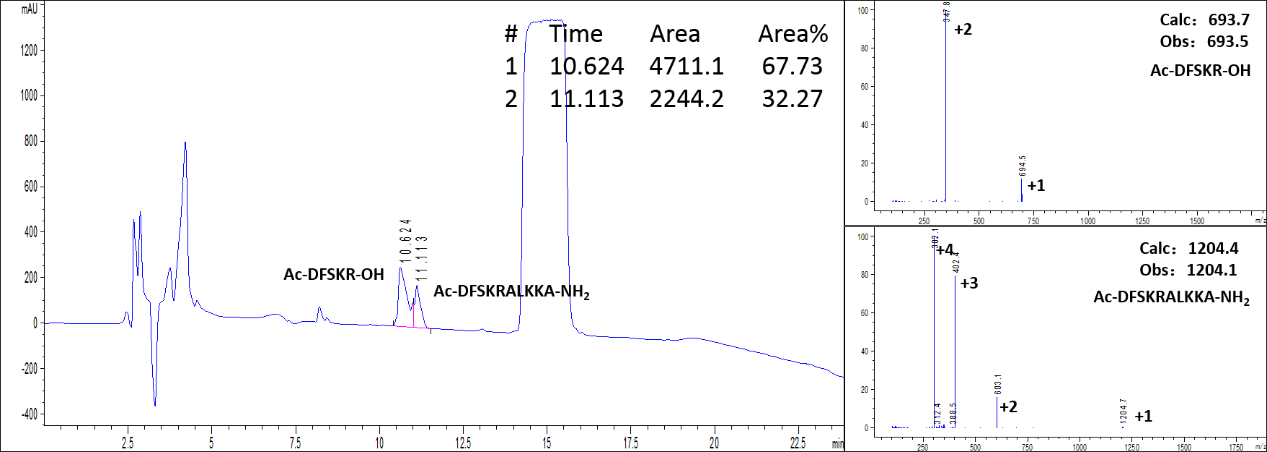

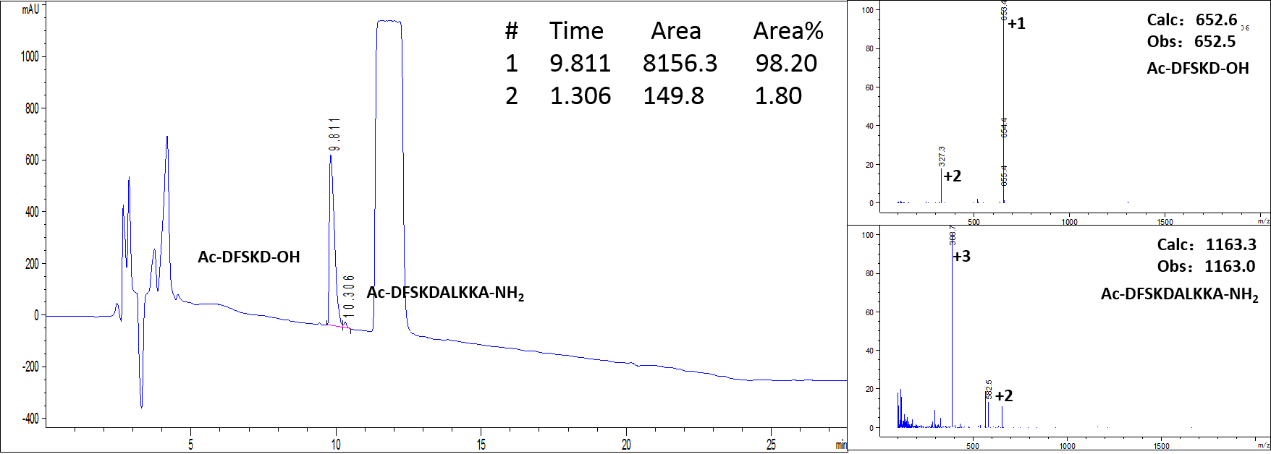

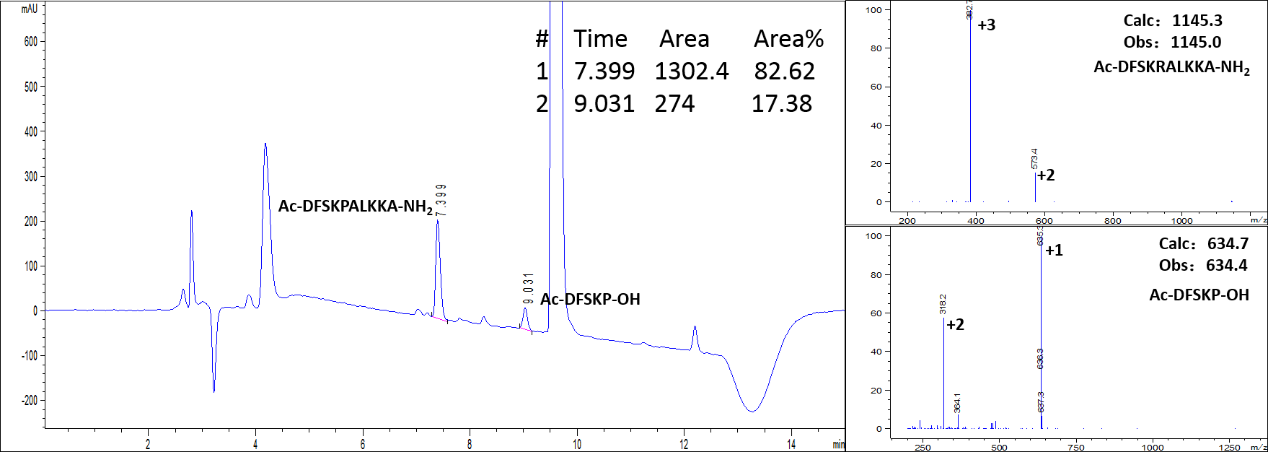


1. **P1 = F, V, I, M**


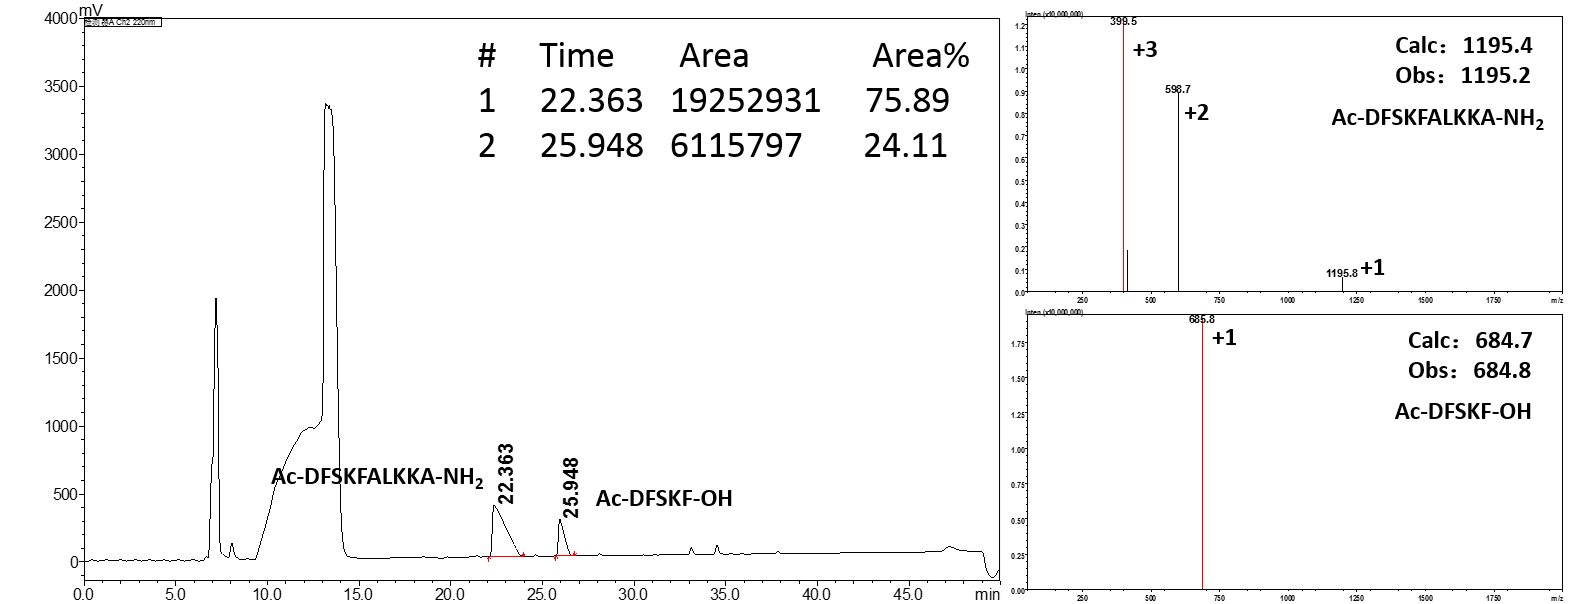

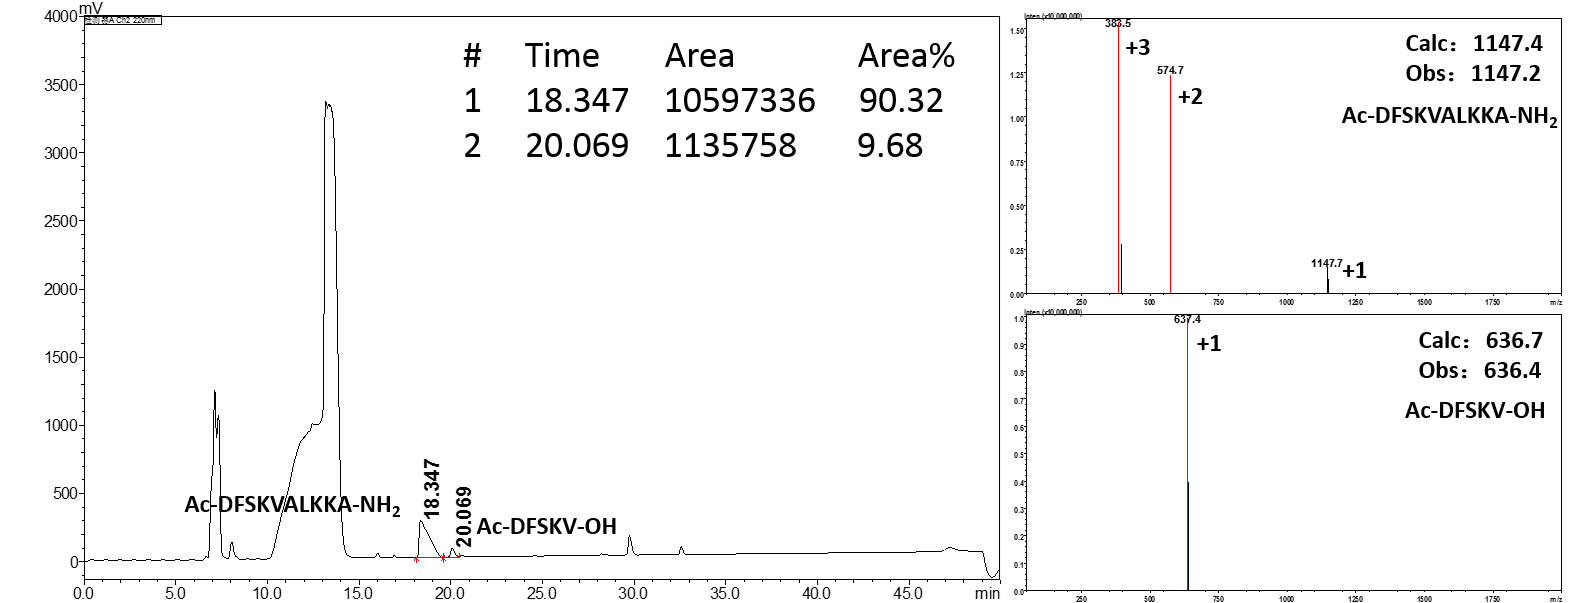

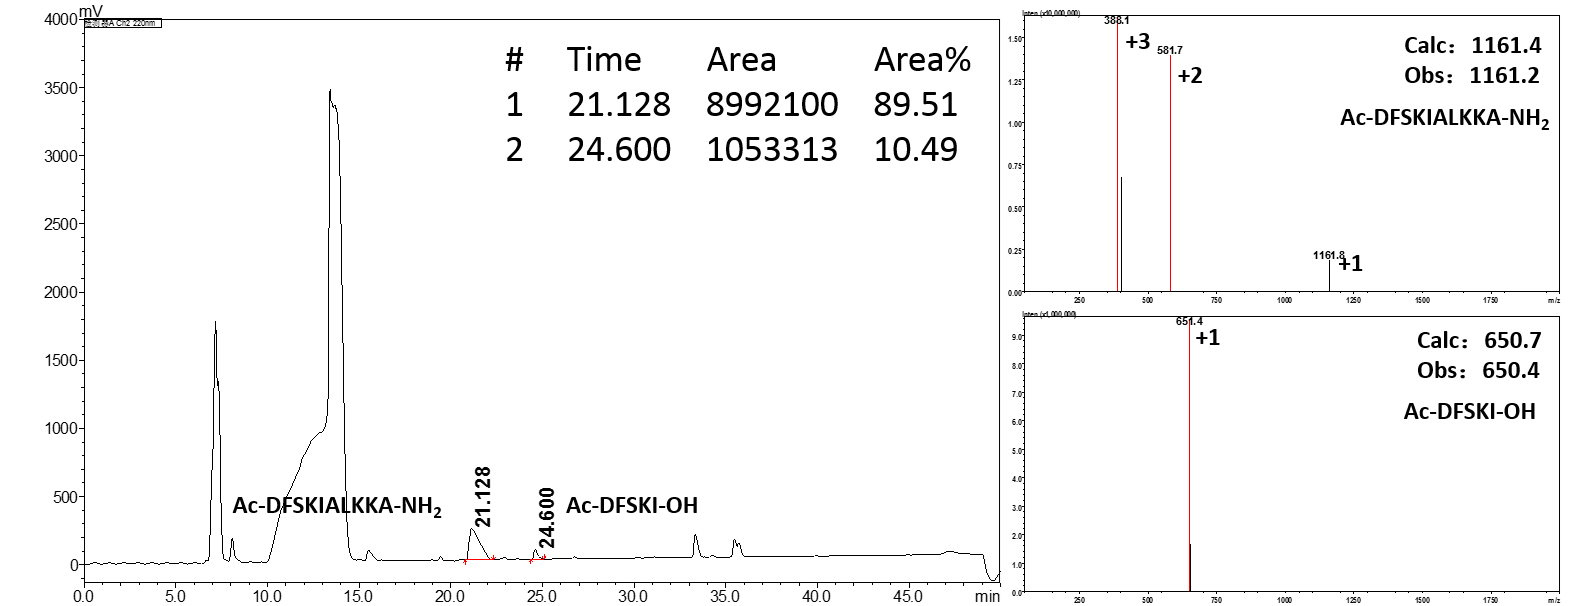

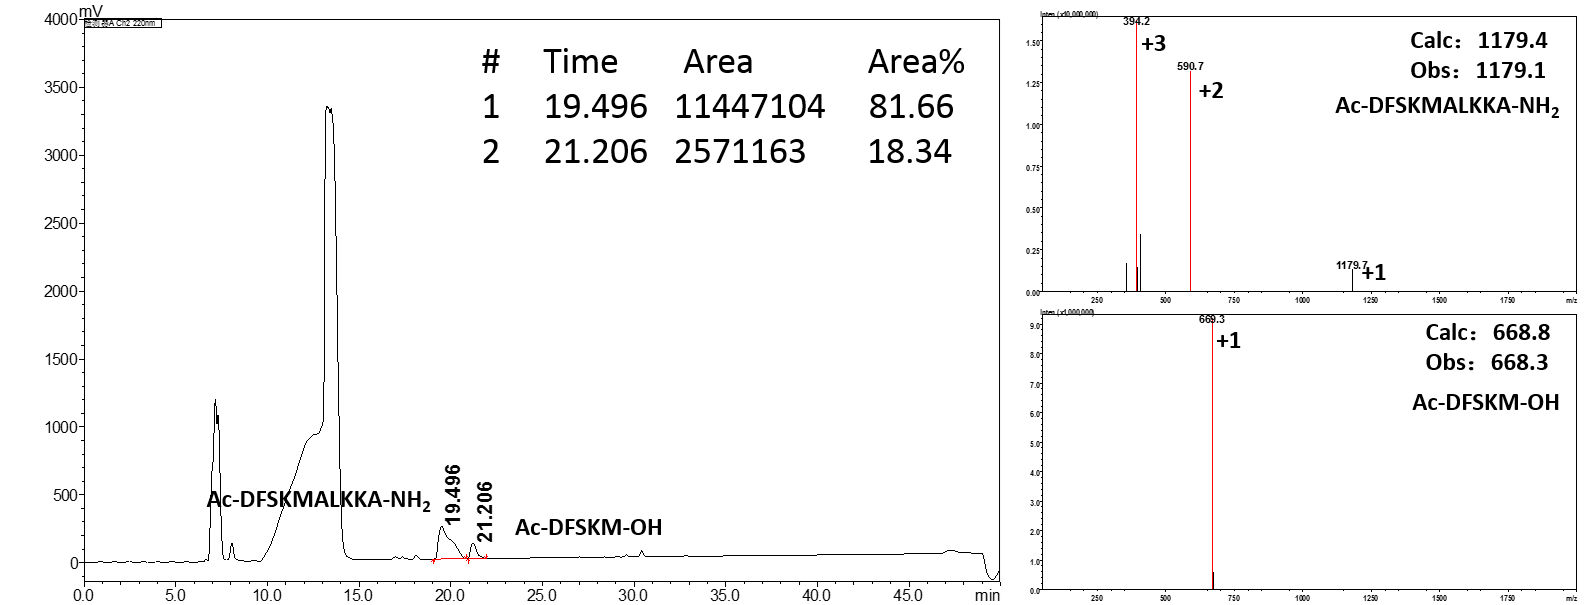


1. **P1 = A, W, Y, S**


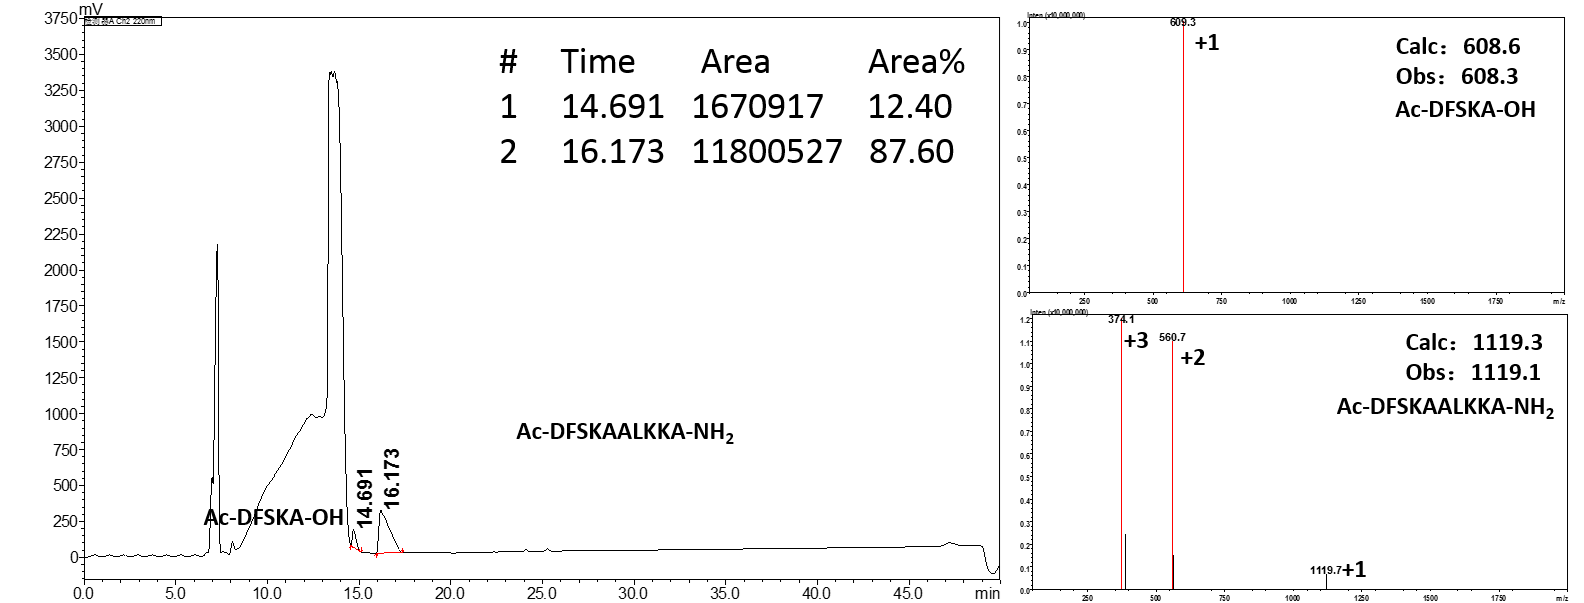

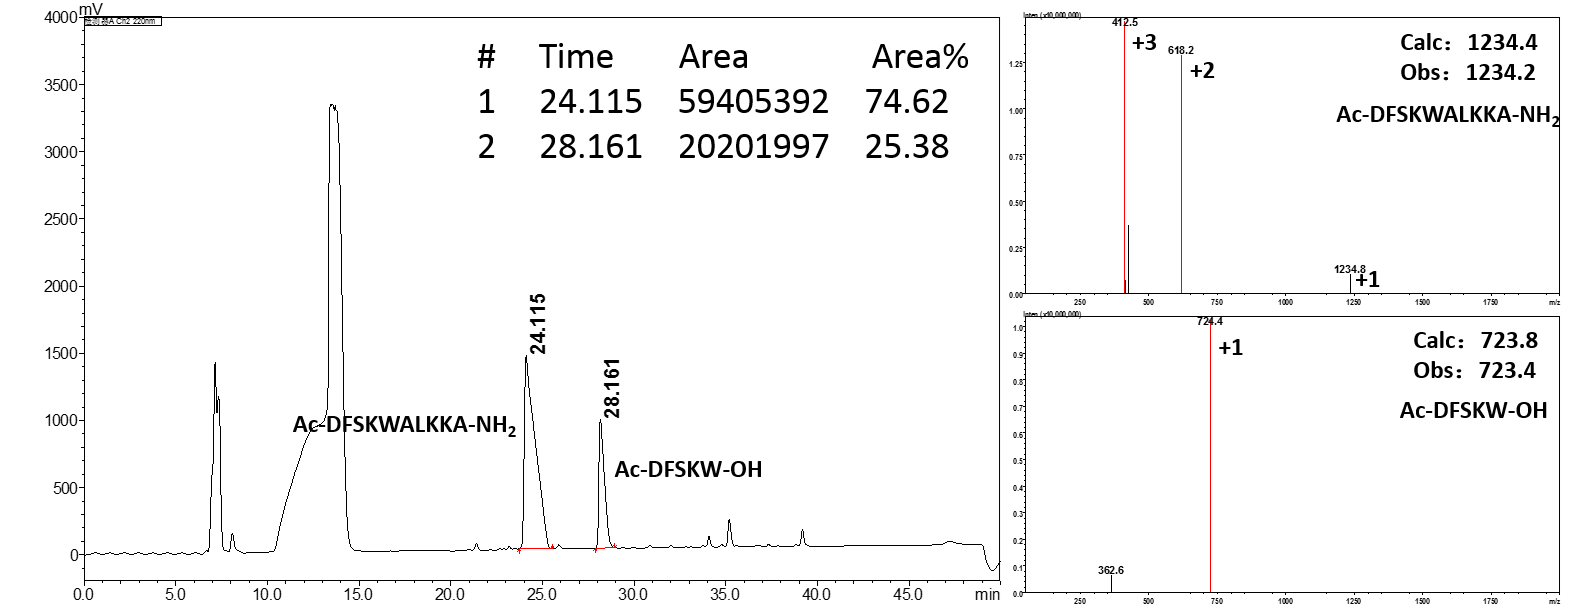

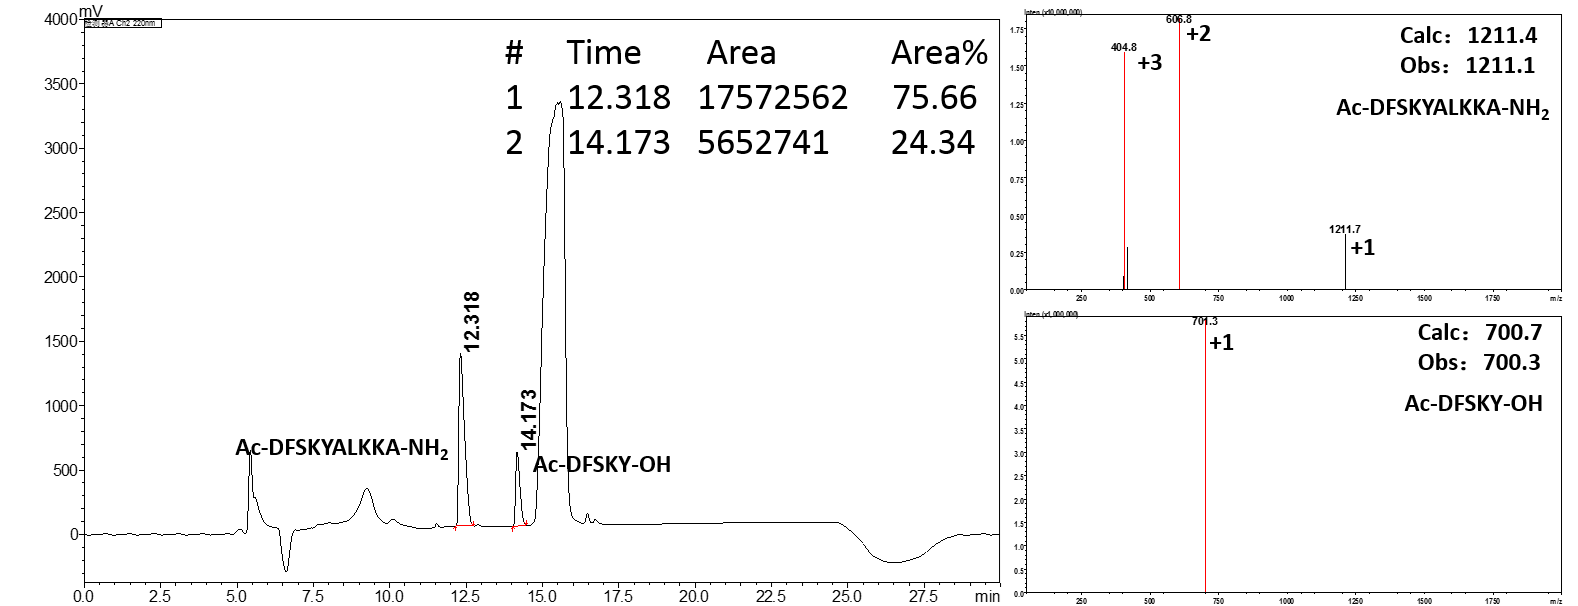

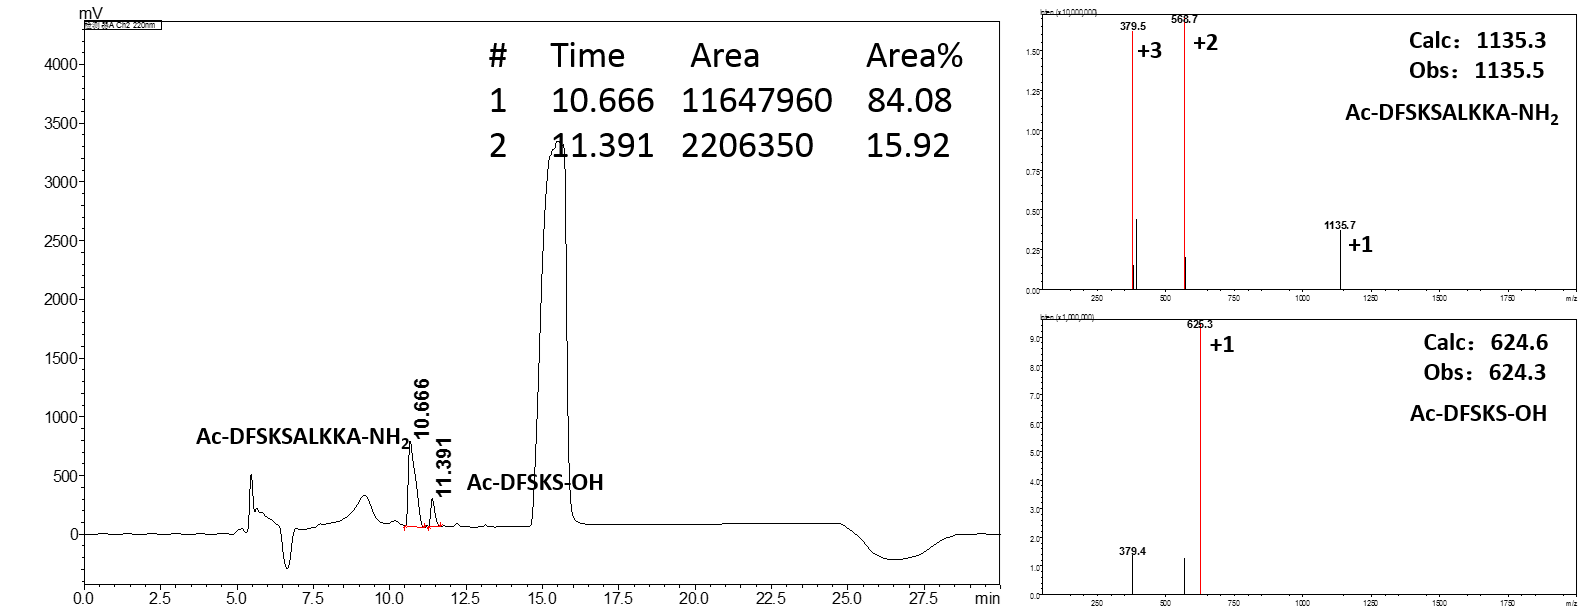


1. **P1 = Q, N, G, H**


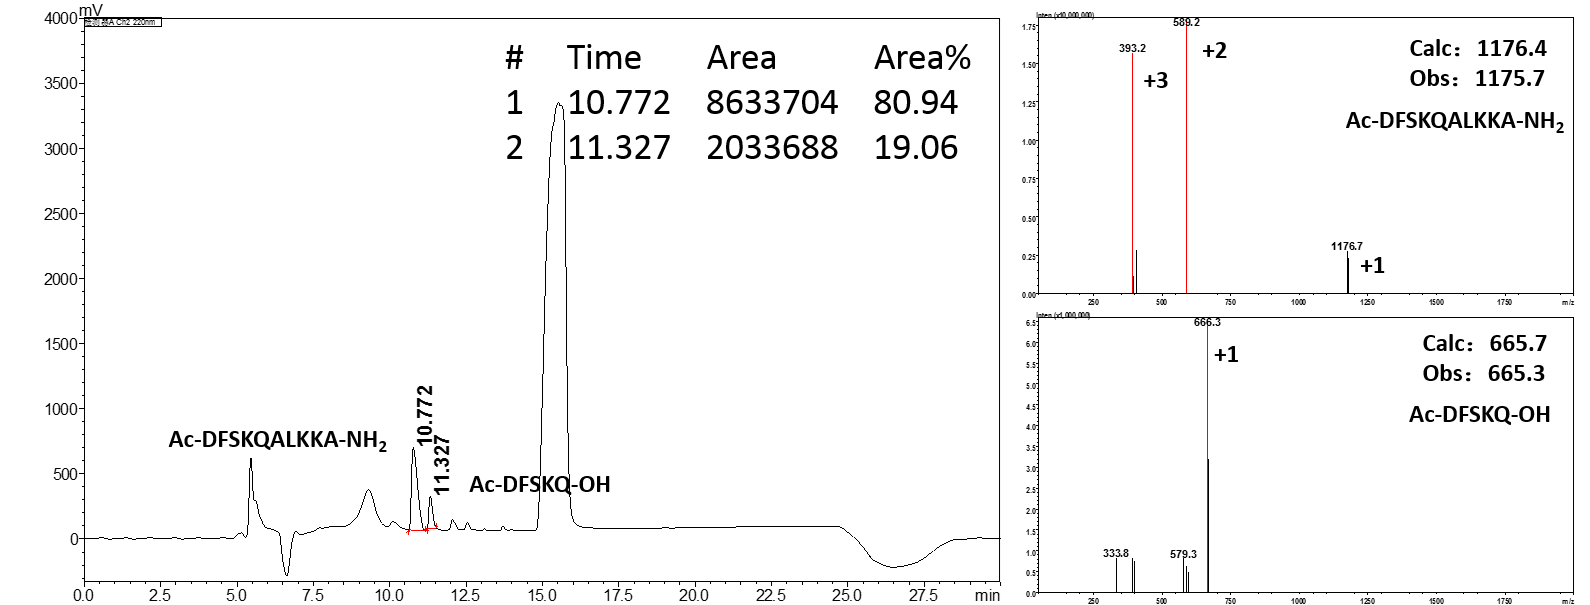

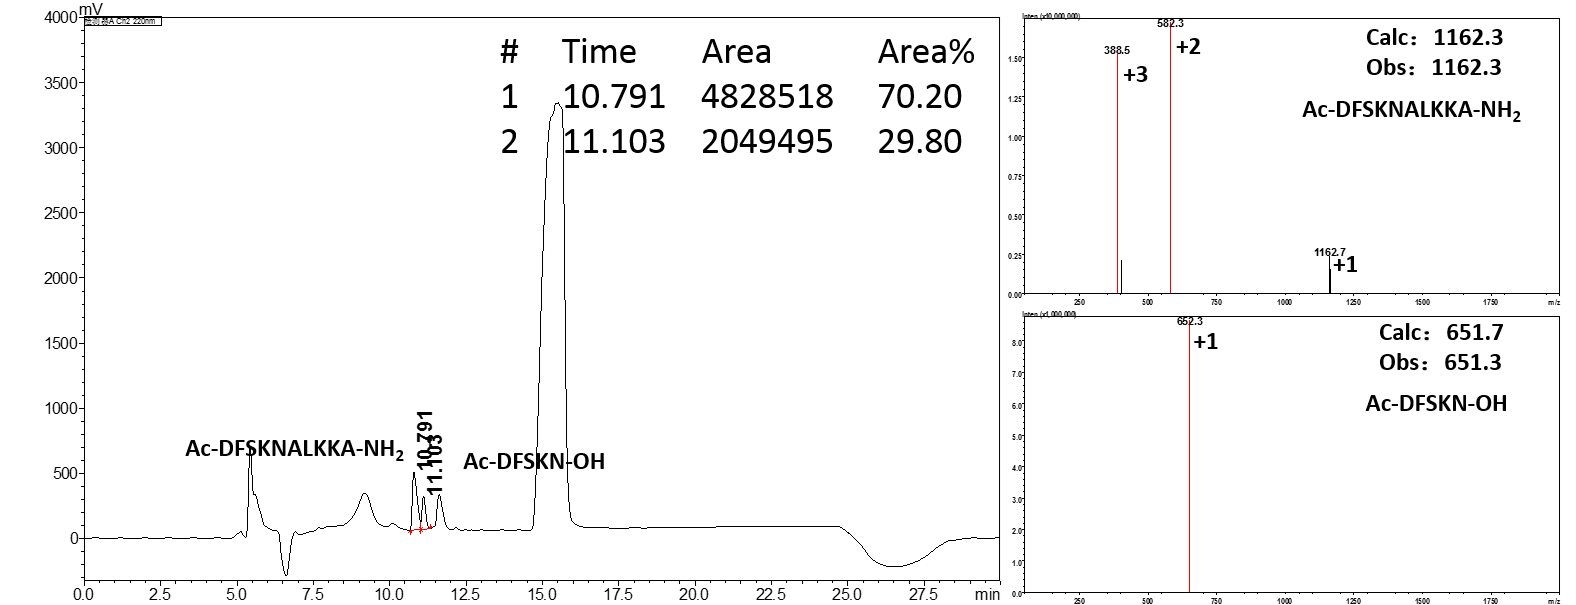

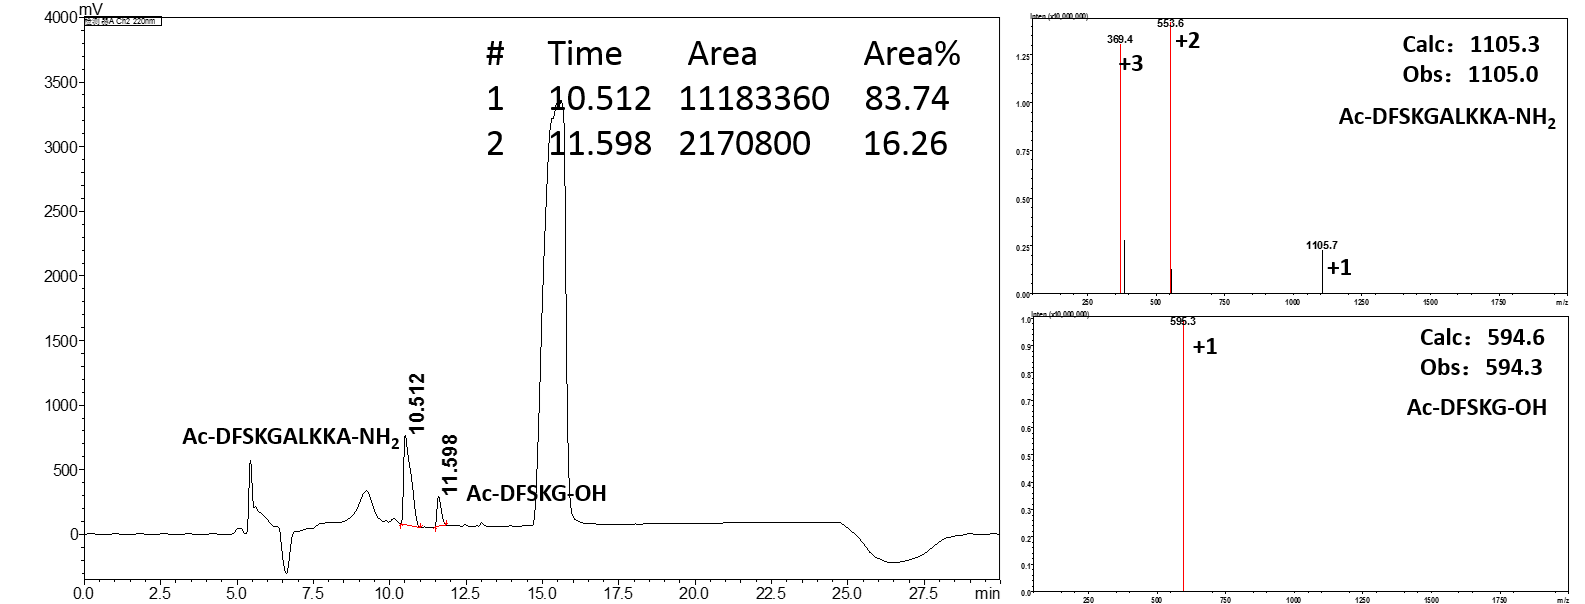

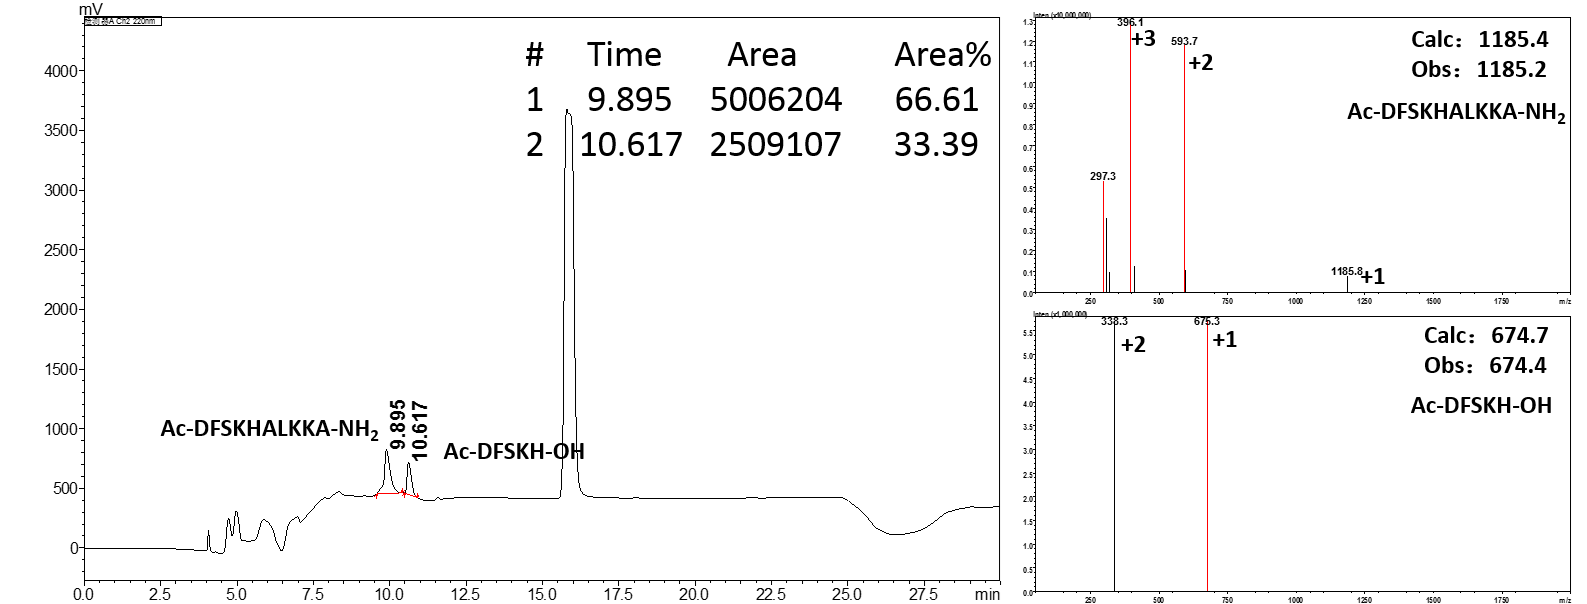


1. **P1 = E, K, T**


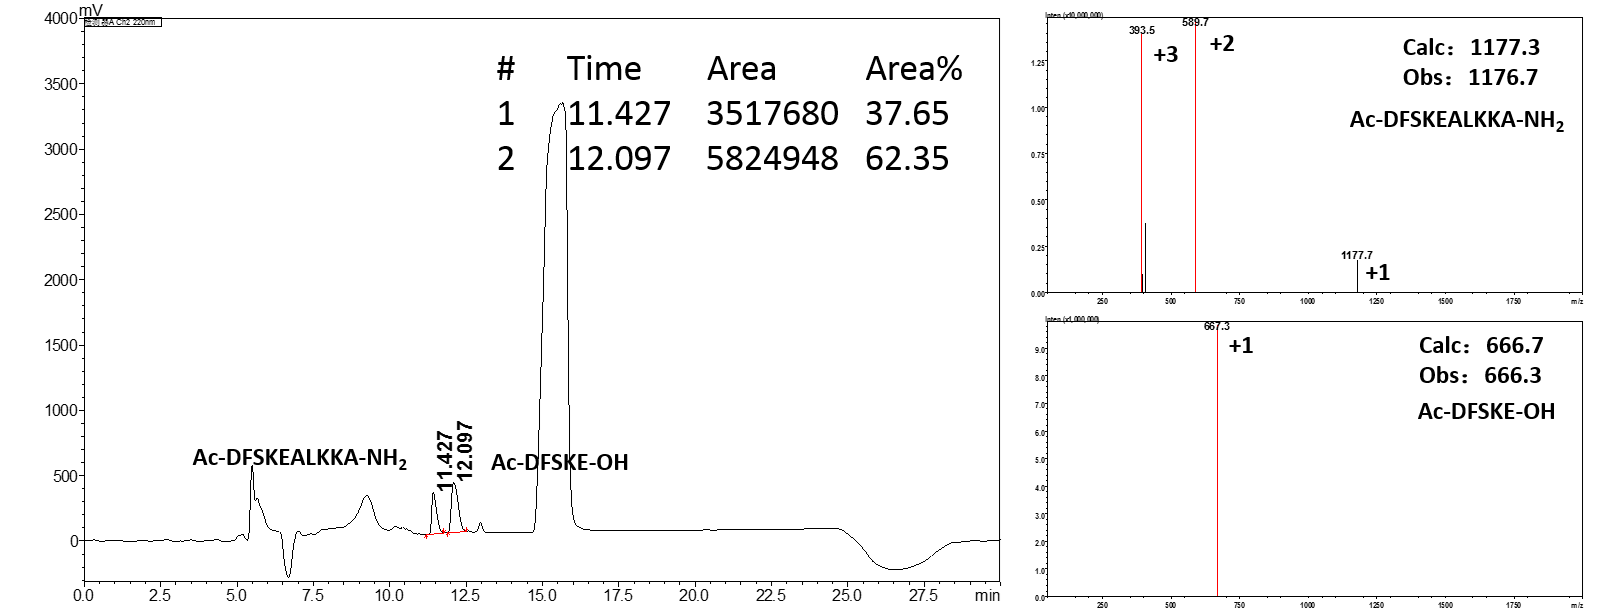

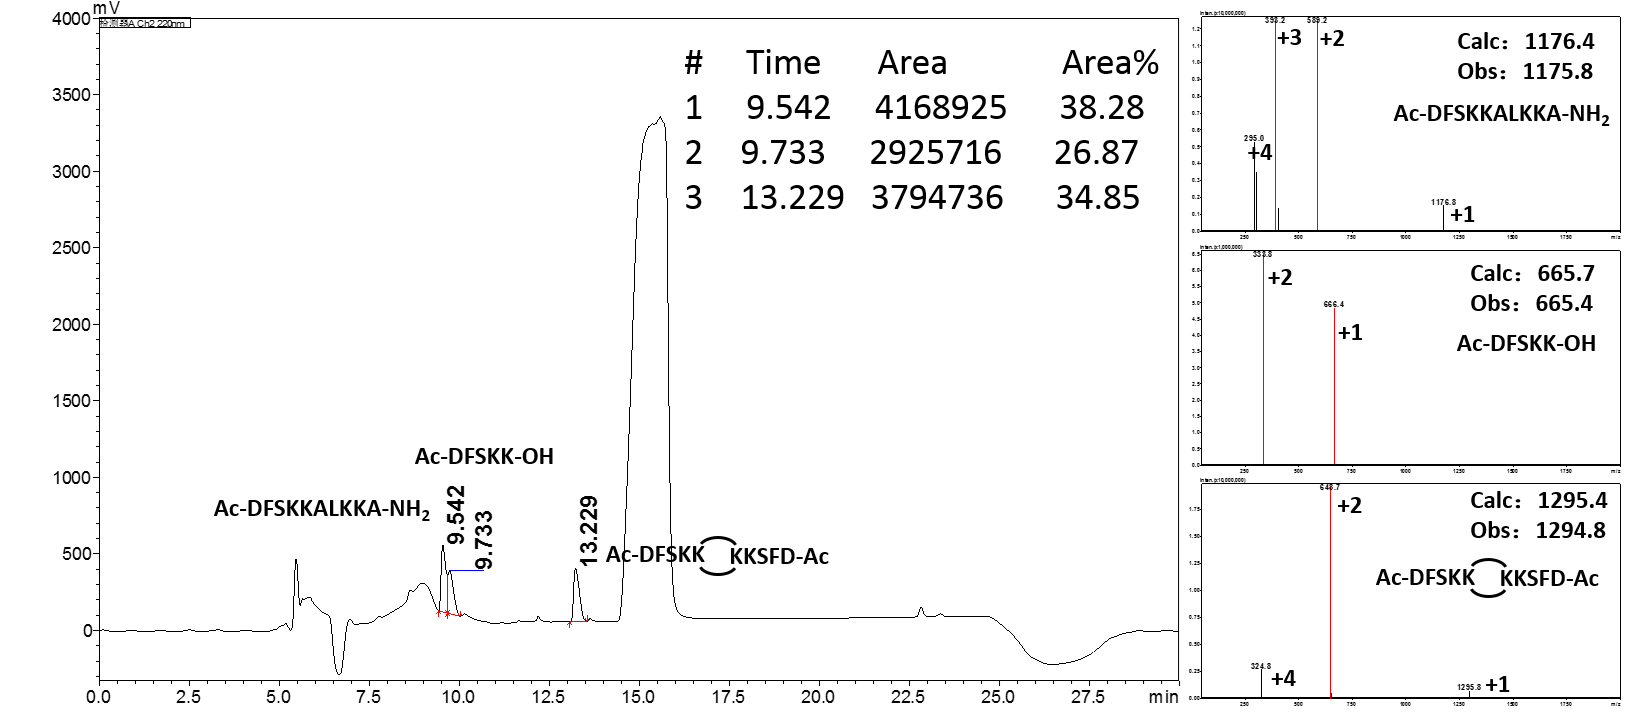

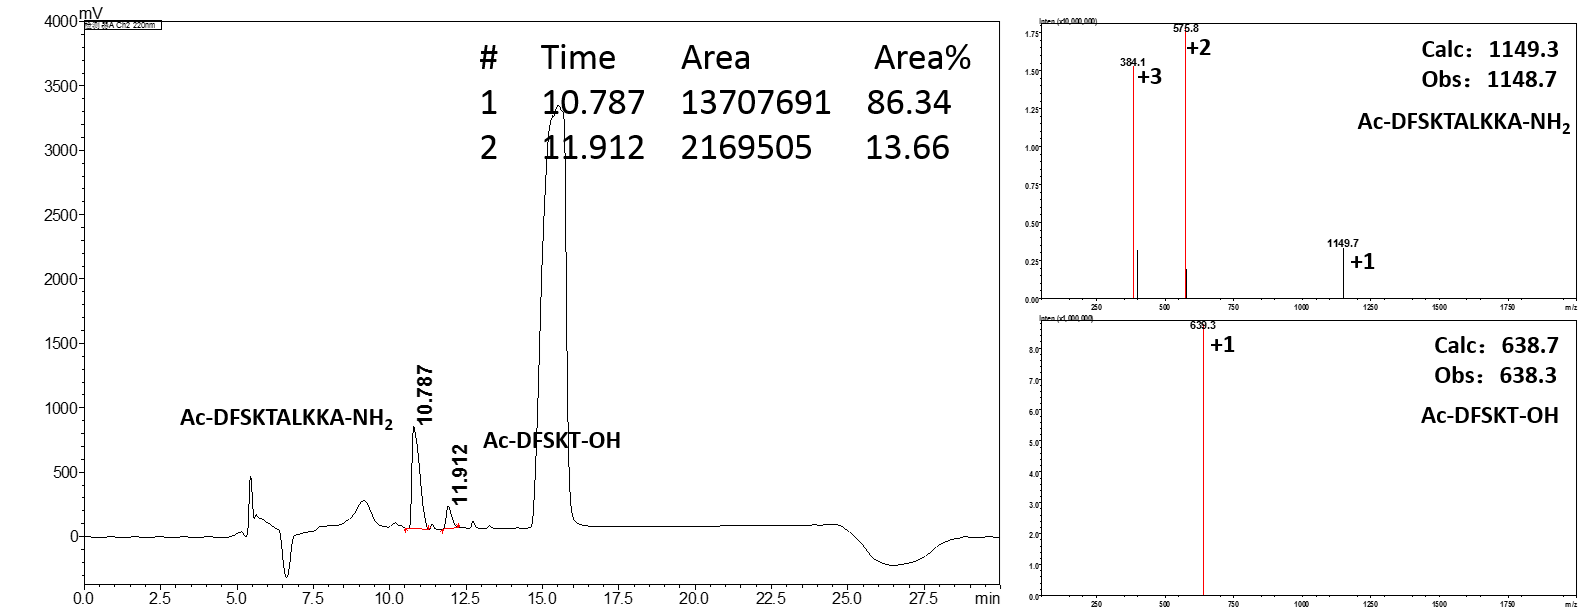


## 2.5 screening of Omniligase-1 P1’ substrates

1. **P1’ = F, I, L, C**


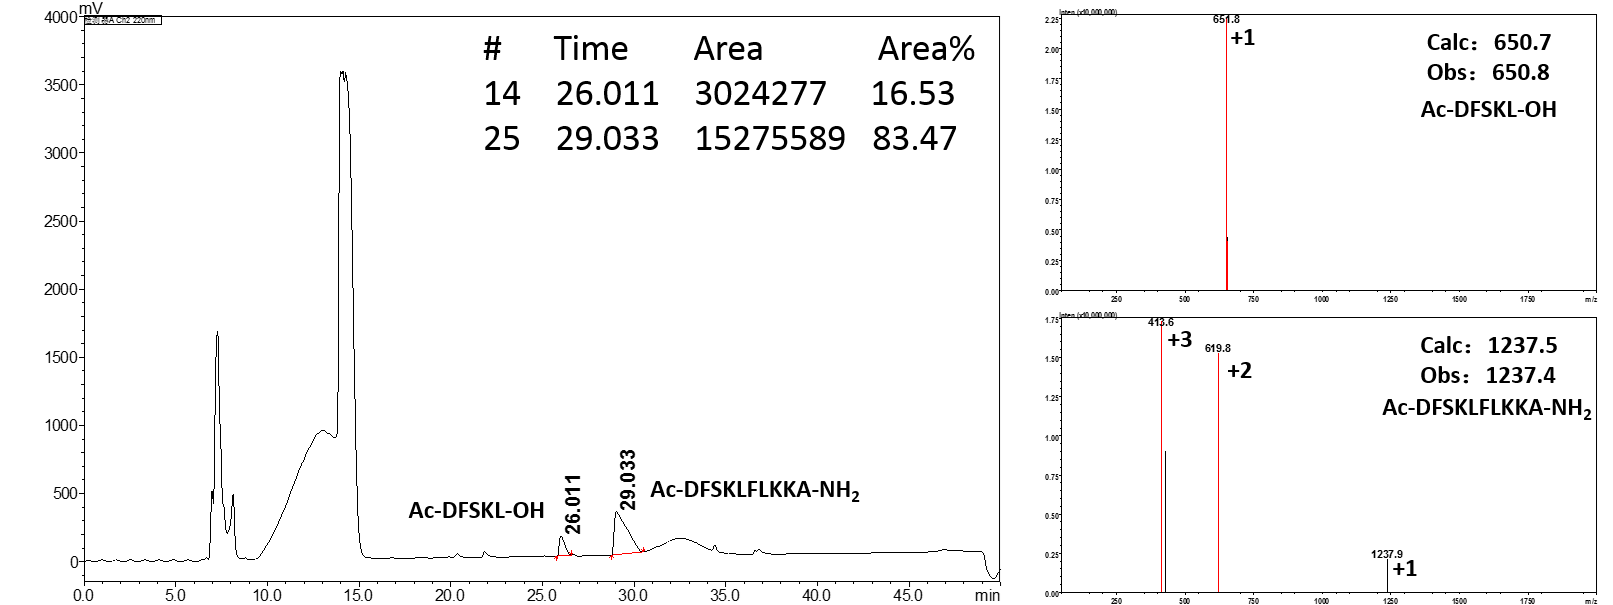

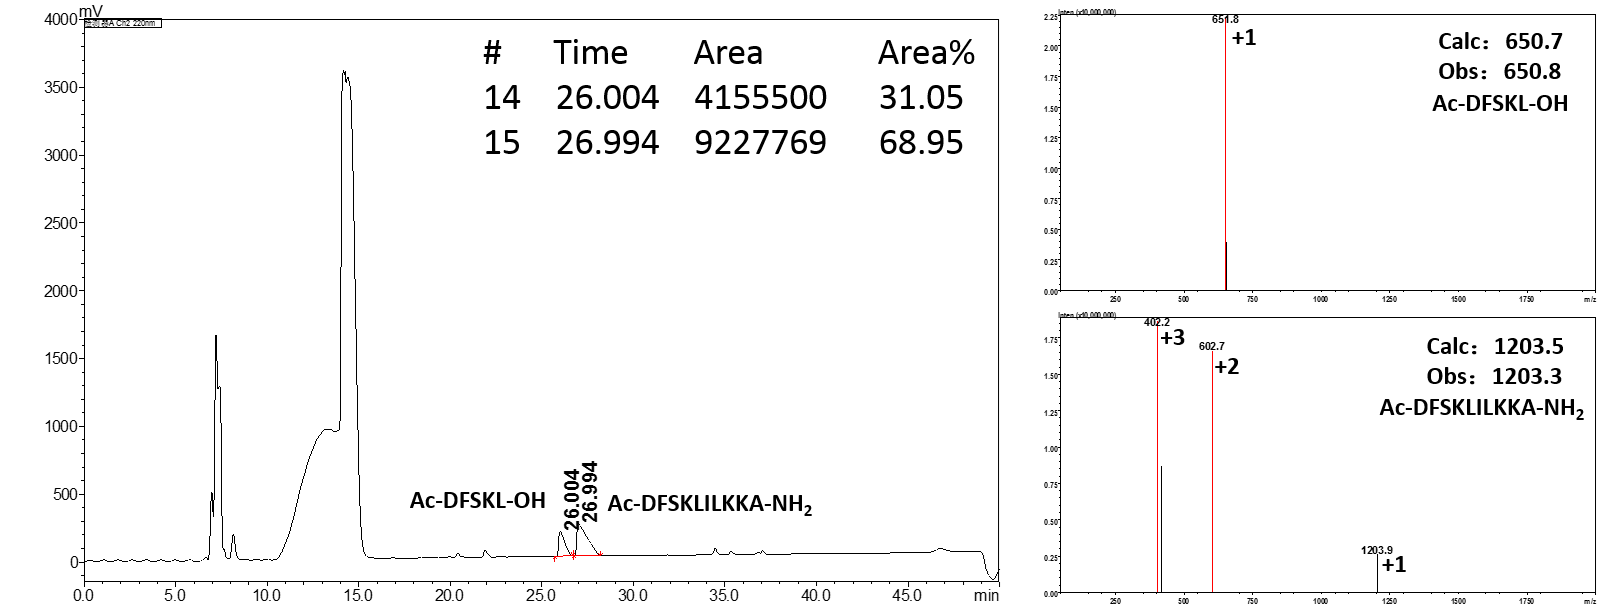

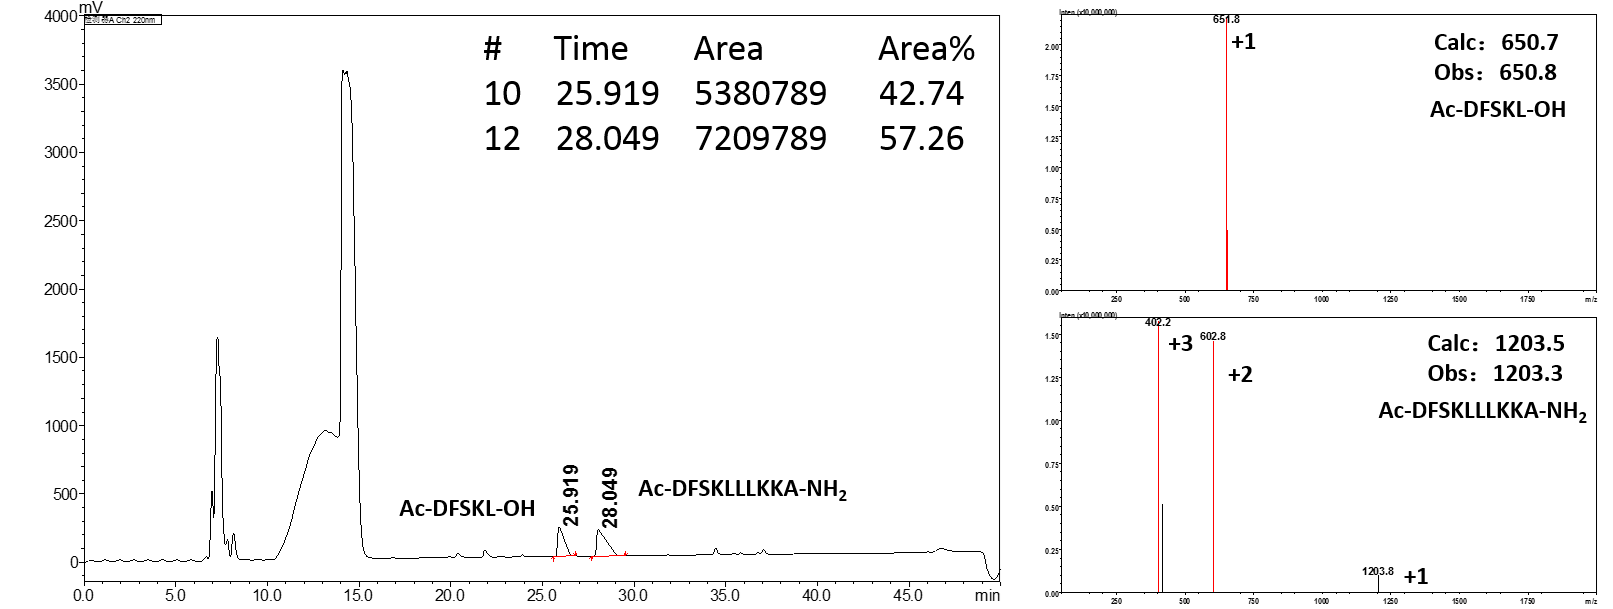

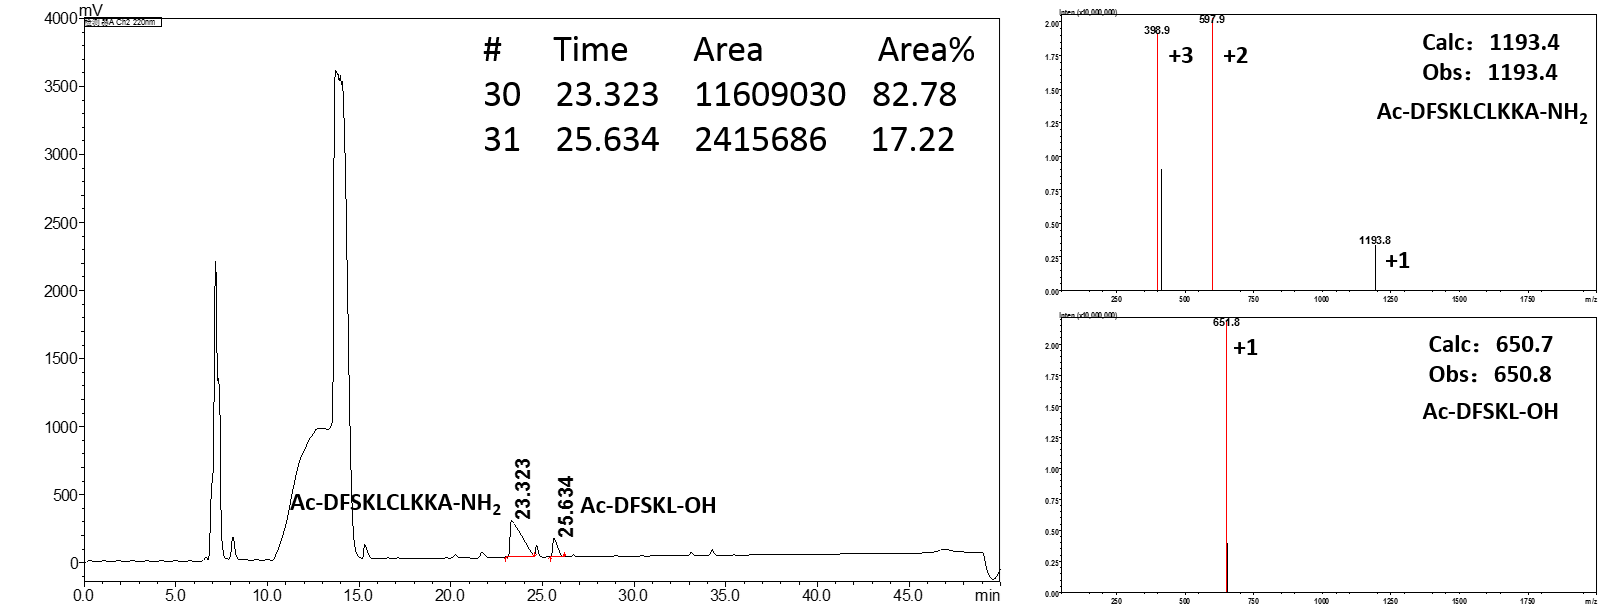


1. **P1’ = W, Y, S, R**


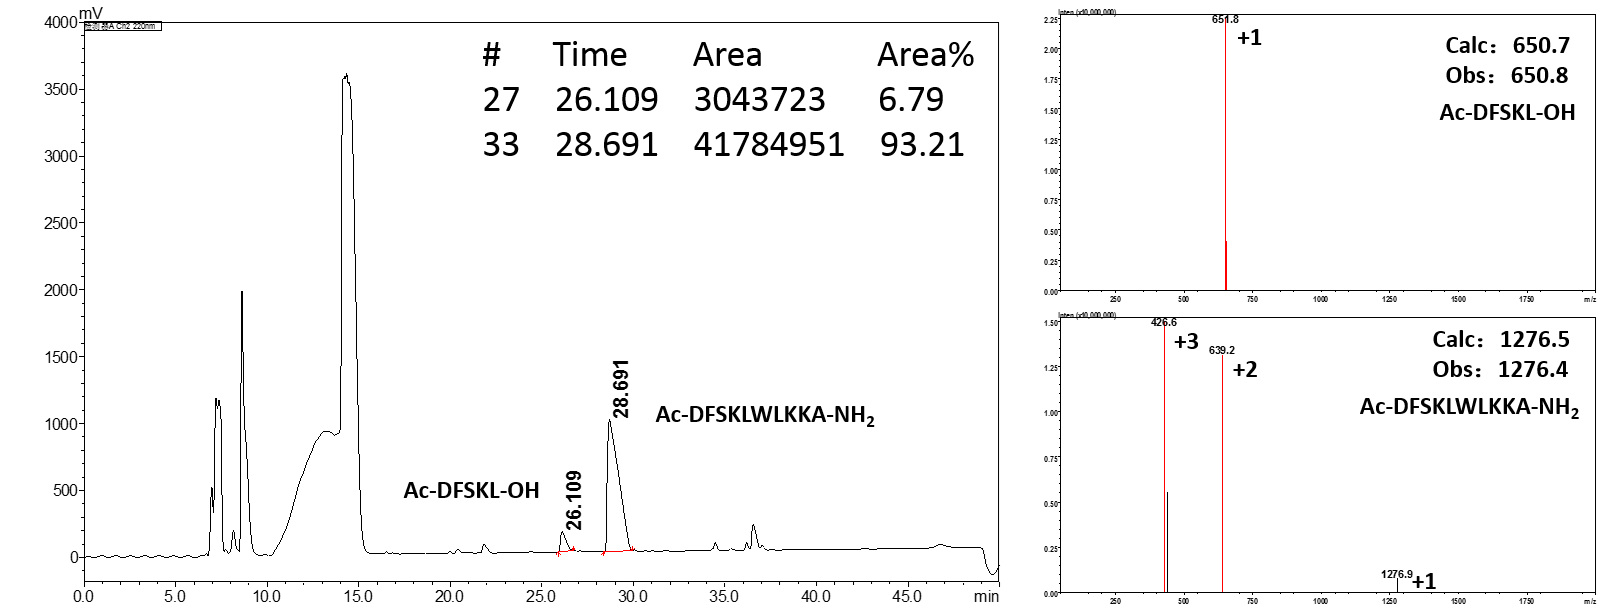

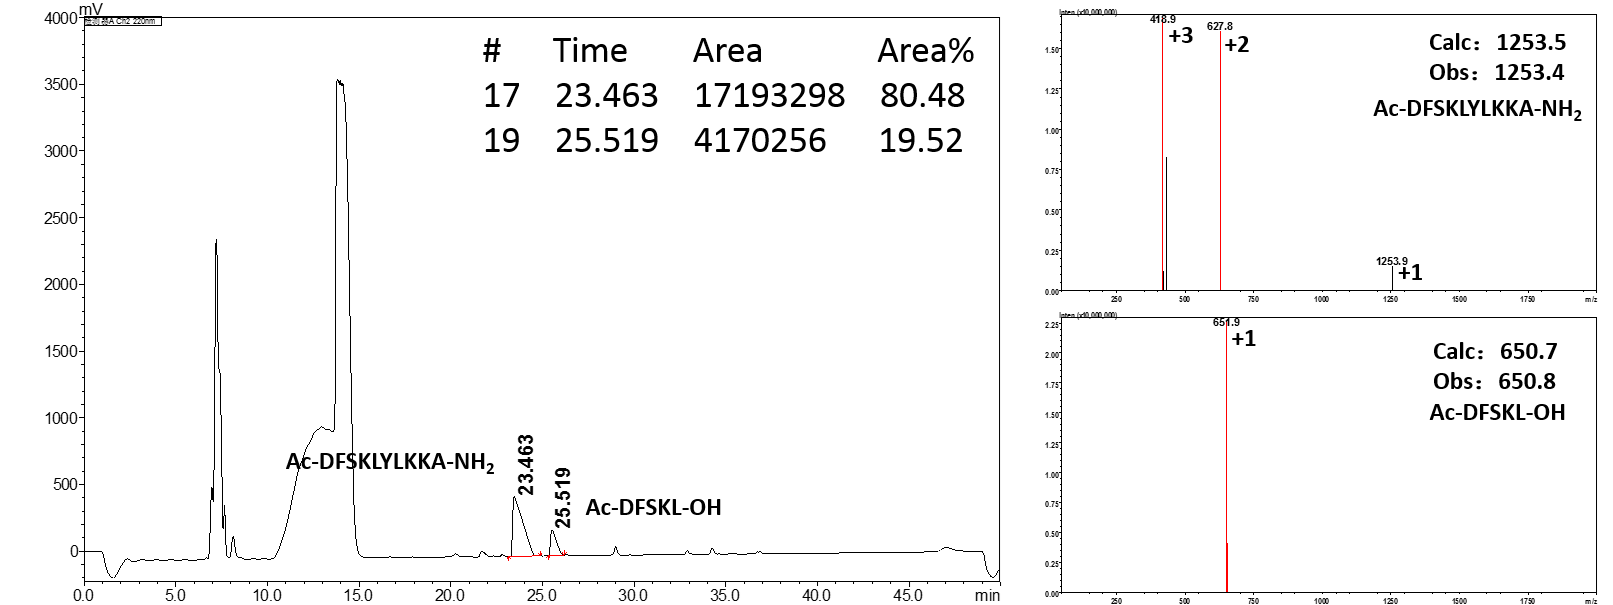

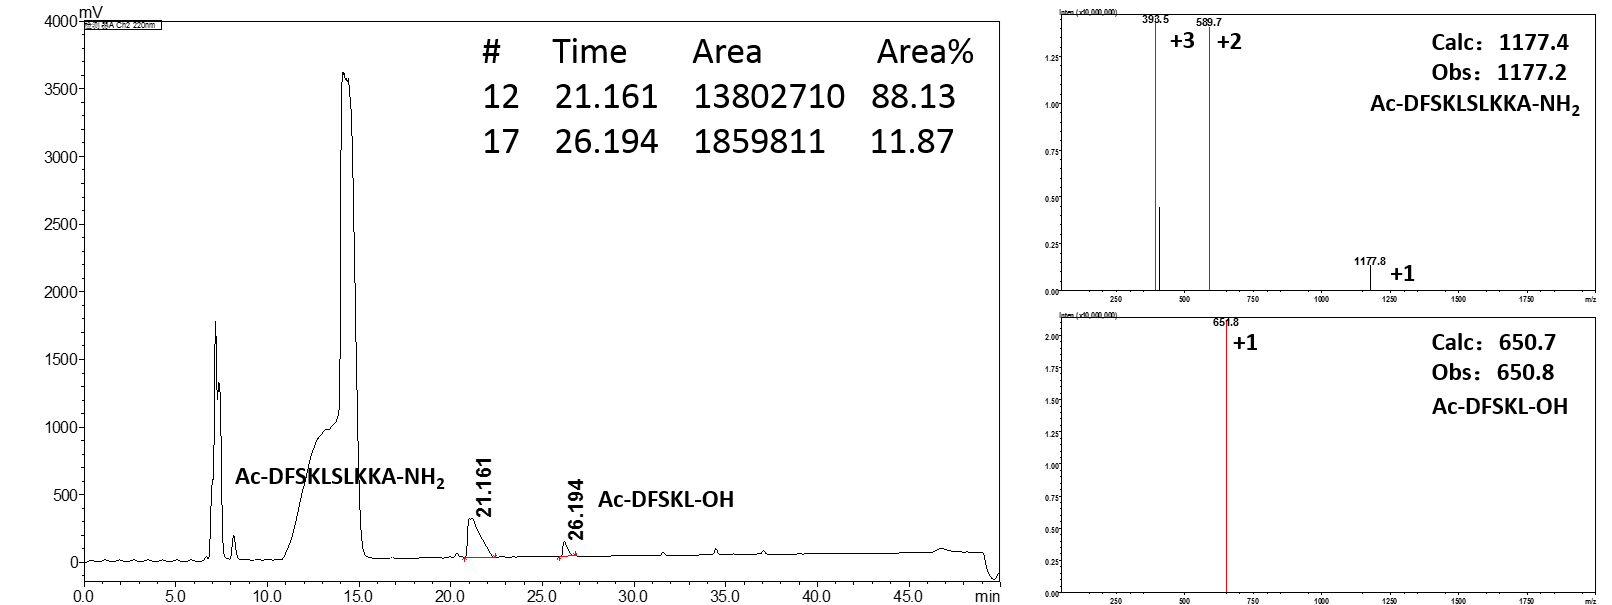

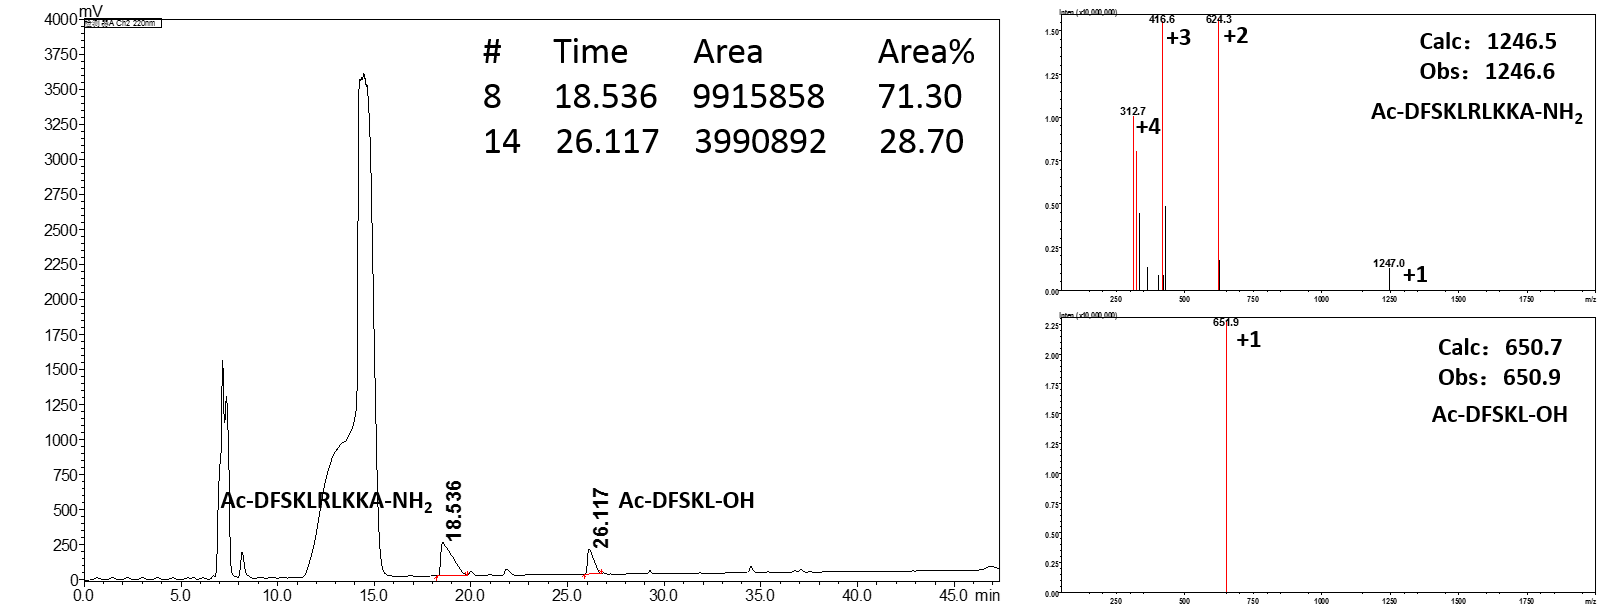


1. **P1’ = Q, D, N, G**


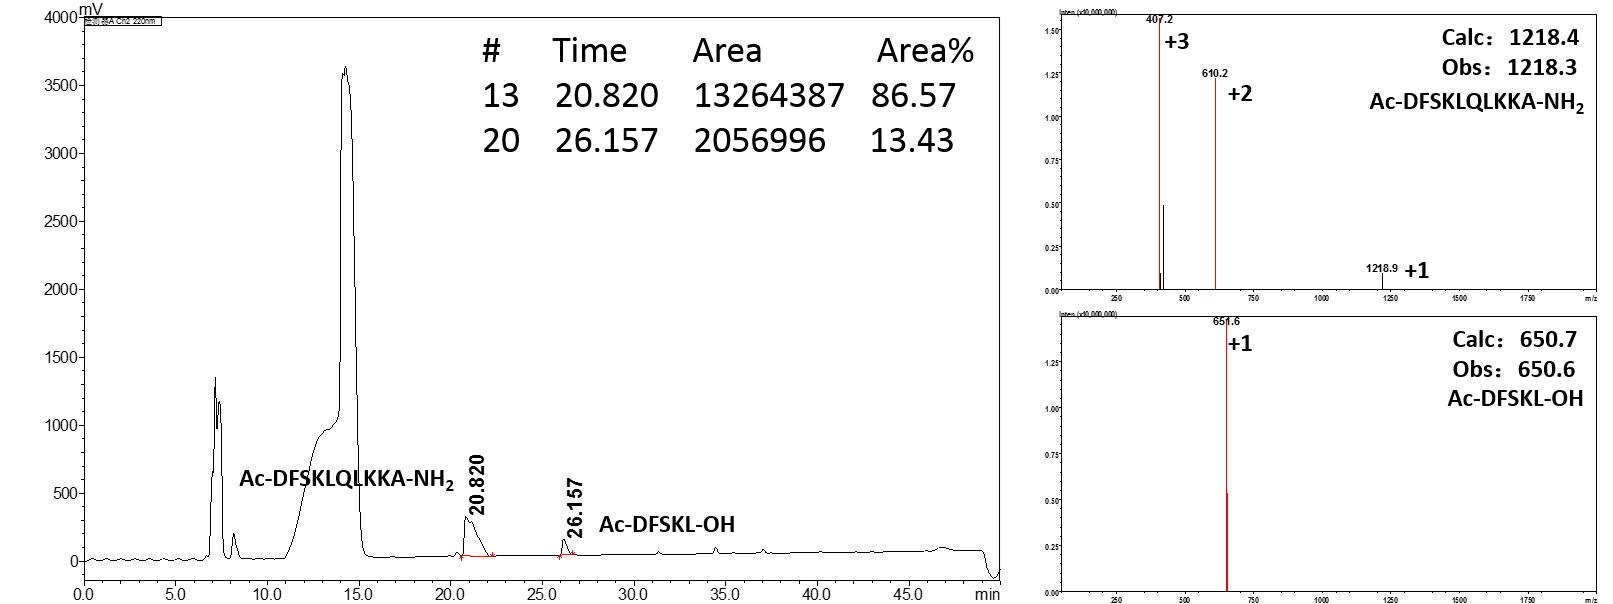

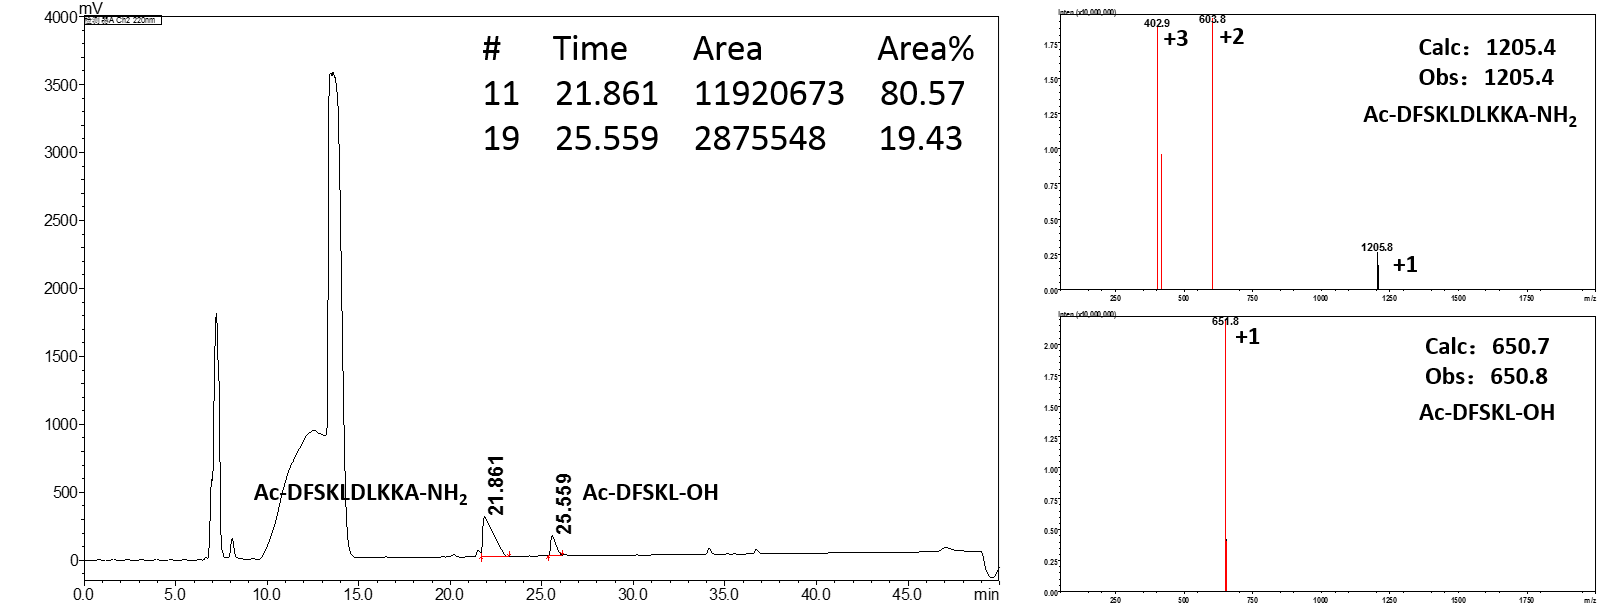

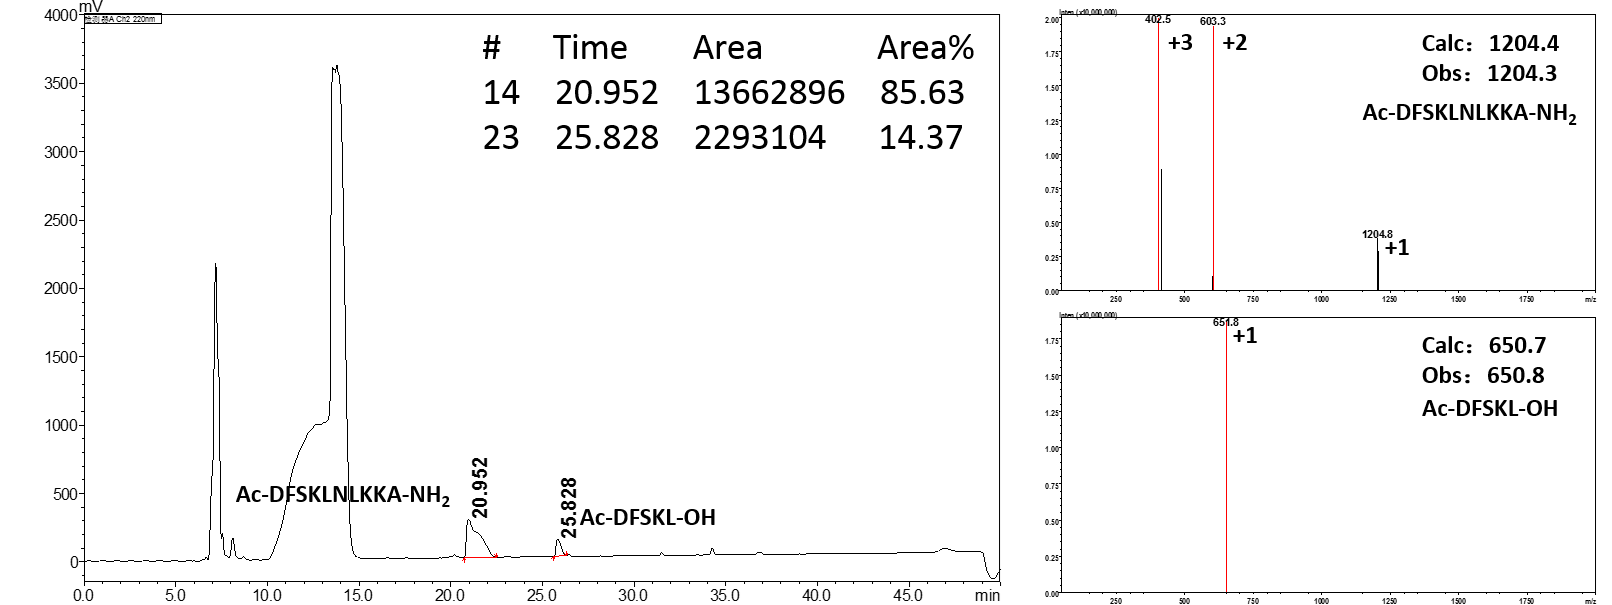


1. **P1’ = H, E, K, P**

1. **P1’ = T, V, M**

## 2.6 screening of Omniligase-1 P2’ substrates

1. **P2’ = F, V, I, M**

1. **P2’ = C, A, W, Y**

1. **P2’ = S, Q, D, N**

1. **P2’ = G, E, P, T**

1. **P2’ = R, H, K**

**DFSKL + ALKKA**

# 3 Substrate screening of PAM12B

## 3.1 screening of PAM12B P2 substrates

1. **P2 = L, Y, V, I, M, F, W, A, R, G**

1. **P2 = E, S, T, H, K, D, C, P, N, Q**

## 3.2 screening of PAM12B P1 substrates

1. **P1 = L, Y, V, I, M, F, W, A, R, G**

1. **P1 = E, S, T, H, K, D, C, Q**

# 4 Screening of PHM, PAL & PAM12B P1 substrates

1. **P1 = A, R**

1. **P1 = D, C**

1. **P1 = E, Q**

1. **P1 = G, H**

1. **P1 = I, L**

1. **P1 = K, M**

1. **P1 = F, S**

1. **P1 = T, W**

1. **P1 = Y, V**

1. **P1 = P, N**
